# Supplementary material for: Reconstruction of a Global Gene Regulatory Network for Streptomyces Coelicolor: Curation, Inference, and Assessment
Source: Research Square preprint supplement (doi:10.21203/rs.3.rs-869179/v1), 2021-09-20
Supplement: Supplementary file 1 [file 4b1b811f8f8bae631861fecd.xlsx]

## Sheet: Inferred_BS
TF	TG
SCO3361	SCO3362
SCO3361	SCO3361
SCO2987	SCO2987
SCO2987	SCO2986
SCO2935	SCO2928
SCO2935	SCO2927
SCO2928	SCO2928
SCO2928	SCO2927
SCO5033	SCO5033
SCO5033	SCO5032
SCO7168	SCO7167
SCO7168	SCO7168
SCO5085	SCO5087
SCO5085	SCO5086
SCO5085	SCO5071
SCO5085	SCO5072
SCO1678	SCO1679
SCO1678	SCO1678
SCO3226	SCO3217
SCO4596	SCO4596
SCO7427	SCO7094
SCO1697	SCO7008
SCO6974	SCO6979
SCO6974	SCO6978
SCO2120	SCO4225
SCO4596	SCO0736
SCO5231	SCO7224
SCO5231	SCO7225
SCO5206	SCO5206
SCO4118	SCO3925
SCO5206	SCO0379
SCO5206	SCO0378
SCO5231	SCO1390
SCO4118	SCO2907
SCO0204	SCO6041
SCO0204	SCO6040
SCO0204	SCO3751
SCO0204	SCO3750
SCO2120	SCO7613
SCO1697	SCO2479
SCO1697	SCO2478
SCO6294	SCO7176
SCO6294	SCO7177
SCO5231	SCO5841
SCO5231	SCO5842
SCO5231	SCO2907
SCO5216	SCO5216
SCO5216	SCO4160
SCO5216	SCO4159
SCO5216	SCO4204
SCO5231	SCO5232
SCO5405	SCO7682
SCO5231	SCO2905
SCO5231	SCO2906
SCO5405	SCO7681
SCO6294	SCO7273
SCO3356	SCO4471
SCO5231	SCO4286
SCO5231	SCO4285
SCO0204	SCO5321
SCO0204	SCO5320
SCO2120	SCO1700
SCO0204	SCO0207
SCO0204	SCO0208
SCO0608	SCO3925
SCO2120	SCO4011
SCO6294	SCO5911
SCO6294	SCO5912
SCO4426	SCO4142
SCO5820	SCO3471
SCO5231	SCO6344
SCO5231	SCO6345
SCO2792	SCO2699
SCO6294	SCO6289
SCO5231	SCO1444
SCO2792	SCO5876
SCO2792	SCO5877
SCO6256	SCO6257
SCO6256	SCO6255
SCO6256	SCO2727
SCO6256	SCO6256
SCO6256	SCO2728
SCO7427	SCO7426
SCO7427	SCO7427
SCO2120	SCO4924
SCO3356	SCO2056
SCO2508	SCO3429
SCO2508	SCO3428
SCO5231	SCO6012
SCO5231	SCO6013
SCO5231	SCO1429
SCO2120	SCO2101
SCO6974	SCO2727
SCO6974	SCO2728
SCO4230	SCO0033
SCO4230	SCO0034
SCO0204	SCO4186
SCO0204	SCO2967
SCO2120	SCO7460
SCO2120	SCO7459
SCO1576	SCO2231
SCO1576	SCO2232
SCO6256	SCO4237
SCO2120	SCO6727
SCO2120	SCO6728
SCO6256	SCO6986
SCO6256	SCO6985
SCO4230	SCO2210
SCO4159	SCO1863
SCO4159	SCO1864
SCO5231	SCO6033
SCO5231	SCO6032
SCO0204	SCO5979
SCO0204	SCO5978
SCO4596	SCO6992
SCO4230	SCO3791
SCO4230	SCO3790
SCO3361	SCO4184
SCO3361	SCO4183
SCO5216	SCO3202
SCO4230	SCO4878
SCO4230	SCO4879
SCO3226	SCO5881
SCO4596	SCO6547
SCO3356	SCO2334
SCO6685	SCO6681
SCO5085	SCO5083
SCO0608	SCO2924
SCO1135	SCO0699
SCO1135	SCO1066
SCO5231	SCO5231
SCO4230	SCO1394
SCO4230	SCO1393
SCO1489	SCO1489
SCO1697	SCO1178
SCO1135	SCO0719
SCO1135	SCO5455
SCO1135	SCO1065
SCO1135	SCO5847
SCO1135	SCO5044
SCO1135	SCO0579
SCO1135	SCO6520
SCO1135	SCO1132
SCO1135	SCO5874
SCO1135	SCO5045
SCO1135	SCO4438
SCO3201	SCO3201
SCO4230	SCO4159
SCO4230	SCO4160
SCO4230	SCO4142
SCO0204	SCO0123
SCO3361	SCO3605
SCO1135	SCO6114
SCO1135	SCO6820
SCO4907	SCO0811
SCO0204	SCO3377
SCO4907	SCO0812
SCO0204	SCO5583
SCO1480	SCO5877
SCO1480	SCO5876
SCO5231	SCO0481
SCO3356	SCO3194
SCO0204	SCO5155
SCO5231	SCO3563
SCO0204	SCO5154
SCO1135	SCO5436
SCO1135	SCO5435
SCO5243	SCO5086
SCO1135	SCO1536
SCO1135	SCO0634
SCO1135	SCO3686
SCO1135	SCO0635
SCO1135	SCO3834
SCO1135	SCO7138
SCO1135	SCO2196
SCO1135	SCO7137
SCO1135	SCO3323
SCO1135	SCO1020
SCO4118	SCO5529
SCO2792	SCO5085
SCO2508	SCO2505
SCO0204	SCO2264
SCO3063	SCO7336
SCO3063	SCO7337
SCO0204	SCO7444
SCO0204	SCO7445
SCO0204	SCO0200
SCO6265	SCO1403
SCO6265	SCO1402
SCO0204	SCO1770
SCO0204	SCO2619
SCO0204	SCO0204
SCO5231	SCO5236
SCO1135	SCO2198
SCO1135	SCO6171
SCO1135	SCO1133
SCO6256	SCO6978
SCO6265	SCO6324
SCO6256	SCO6979
SCO5085	SCO3311
SCO1135	SCO2679
SCO1135	SCO2680
SCO1135	SCO0952
SCO2120	SCO6993
SCO3356	SCO1559
SCO5231	SCO6300
SCO3668	SCO2703
SCO3226	SCO5085
SCO2508	SCO7681
SCO2508	SCO7682
SCO5552	SCO6266
SCO5552	SCO6265
SCO4596	SCO2381
SCO6294	SCO5315
SCO1135	SCO7629
SCO3356	SCO3602
SCO1135	SCO0163
SCO1135	SCO0086
SCO1135	SCO0543
SCO1135	SCO1090
SCO1135	SCO4986
SCO1135	SCO4747
SCO1135	SCO1089
SCO1135	SCO0612
SCO1135	SCO5956
SCO1135	SCO5955
SCO0204	SCO1362
SCO3063	SCO6706
SCO3063	SCO6705
SCO5231	SCO4315
SCO3202	SCO3034
SCO4230	SCO3781
SCO4426	SCO4425
SCO3668	SCO3292
SCO1489	SCO1488
SCO0204	SCO6449
SCO4230	SCO2282
SCO1135	SCO2897
SCO1135	SCO2242
SCO1135	SCO6291
SCO1135	SCO7039
SCO1135	SCO0192
SCO1135	SCO0124
SCO0204	SCO3179
SCO5778	SCO5776
SCO1135	SCO5616
SCO0204	SCO4763
SCO3356	SCO6242
SCO4230	SCO1294
SCO5820	SCO5877
SCO5820	SCO5876
SCO3668	SCO3670
SCO0204	SCO5796
SCO1135	SCO4933
SCO1135	SCO4972
SCO1135	SCO5201
SCO1135	SCO6080
SCO1135	SCO5885
SCO1135	SCO0628
SCO1135	SCO3709
SCO1135	SCO6485
SCO1135	SCO3395
SCO1135	SCO4072
SCO1135	SCO1170
SCO1135	SCO4584
SCO1135	SCO7712
SCO1135	SCO3226
SCO1135	SCO1708
SCO1135	SCO3710
SCO0204	SCO7138
SCO0204	SCO7137
SCO4118	SCO1443
SCO1576	SCO0800
SCO1576	SCO0801
SCO1135	SCO0600
SCO3668	SCO3669
SCO4230	SCO5583
SCO3129	SCO3129
SCO0204	SCO0215
SCO0204	SCO4288
SCO5085	SCO5066
SCO5231	SCO4240
SCO5231	SCOt47
SCO1135	SCO7349
SCO1135	SCO5448
SCO1135	SCO1134
SCO1135	SCO4559
SCO1135	SCO7348
SCO1135	SCO5278
SCO1135	SCO0944
SCO1135	SCO0953
SCO1135	SCO5353
SCO1135	SCO3742
SCO1135	SCO4810
SCO1135	SCO4811
SCO1135	SCO1421
SCO1135	SCO2985
SCO1135	SCO3741
SCO1135	SCO6857
SCO1135	SCO3149
SCO1135	SCO0510
SCO1135	SCO5625
SCO1135	SCO2825
SCO3356	SCO2101
SCO3356	SCO5137
SCO3356	SCO4254
SCO3129	SCO3128
SCO3129	SCO3127
SCO4596	SCO7660
SCO4596	SCO7659
SCO0204	SCO3644
SCO1135	SCO7215
SCO6685	SCO4075
SCO0204	SCO2315
SCO1135	SCO0421
SCO1135	SCO5126
SCO1135	SCO3713
SCO1135	SCO7637
SCO1135	SCO5050
SCO1135	SCO5785
SCO1135	SCO3245
SCO1135	SCO6667
SCO1135	SCO1278
SCO1135	SCO7112
SCO1135	SCO7267
SCO1135	SCO6877
SCO1135	SCO2088
SCO1135	SCO3271
SCO1135	SCO1370
SCO1135	SCO0137
SCO1135	SCO7113
SCO1135	SCO6076
SCO1135	SCO3264
SCO1135	SCO1776
SCO1135	SCO4203
SCO1135	SCO3640
SCO1135	SCO4204
SCO1135	SCO1070
SCO1135	SCO3204
SCO1135	SCO3065
SCO1135	SCO2165
SCO1135	SCO4123
SCO1135	SCO5049
SCO1135	SCO1373
SCO1135	SCO5626
SCO1135	SCO5801
SCO1135	SCO5271
SCO1135	SCO3638
SCO1135	SCO7266
SCO1135	SCO6885
SCO1135	SCO4537
SCO1135	SCO0856
SCO1135	SCO0954
SCO1135	SCO5125
SCO1135	SCO6151
SCO4426	SCO4229
SCO4426	SCO4228
SCO0204	SCO2970
SCO0204	SCO2969
SCO1135	SCO1075
SCO1135	SCO2785
SCO1135	SCO0489
SCO4230	SCO5447
SCO4596	SCO1049
SCO0204	SCO0167
SCO2508	SCO0476
SCO5085	SCO3323
SCO1135	SCO0225
SCO1135	SCO3719
SCO4596	SCO6408
SCO1135	SCO7650
SCO1135	SCO1376
SCO1135	SCO5149
SCO1135	SCO0114
SCO1135	SCO5179
SCO1135	SCO6776
SCO1135	SCO4599
SCO1135	SCO0922
SCO1135	SCO5514
SCO1135	SCO5889
SCO1135	SCO3808
SCO1135	SCO1652
SCO1135	SCO7342
SCO1135	SCO5717
SCO1135	SCO1827
SCO1135	SCO6227
SCO1135	SCO7131
SCO1135	SCO7314
SCO1135	SCO7649
SCO1135	SCO5552
SCO1135	SCO2711
SCO1135	SCO5496
SCO1135	SCO6683
SCO1135	SCO6606
SCO1135	SCO7360
SCO1135	SCO6607
SCO1135	SCO2326
SCO1135	SCO2104
SCO1135	SCO7433
SCO1135	SCO5305
SCO1135	SCO0153
SCO1135	SCO2655
SCO1135	SCO2656
SCO1135	SCO3949
SCO1135	SCO6137
SCO1135	SCO1391
SCO1135	SCO4671
SCO1135	SCO3407
SCO1135	SCO7154
SCO1135	SCO7341
SCO1135	SCO5146
SCO1135	SCO1144
SCO1135	SCO5823
SCO1135	SCO2017
SCO1135	SCO6775
SCO1135	SCO5208
SCO1135	SCO7361
SCO1135	SCO7723
SCO1135	SCO7590
SCO1135	SCO3398
SCO1135	SCO5416
SCO1135	SCO5867
SCO1135	SCO4692
SCO3356	SCO2161
SCO0204	SCO7347
SCO4596	SCO3031
SCO1135	SCO6395
SCO3361	SCO1496
SCO5231	SCO6486
SCO0204	SCO1720
SCO1135	SCO7515
SCO0204	SCO0643
SCO0608	SCO1541
SCO6294	SCO3511
SCO0204	SCO0713
SCO5216	SCO7120
SCO1135	SCO0884
SCO3356	SCO1551
SCO0204	SCO2123
SCO4230	SCO0324
SCO4230	SCO0325
SCO0204	SCO0517
SCO0204	SCO1351
SCO1135	SCO0322
SCO1135	SCO0637
SCO1135	SCO6988
SCO1135	SCO0999
SCO0204	SCO2017
SCO4596	SCO5397
SCO0204	SCO4746
SCO4596	SCO5112
SCO4230	SCO0526
SCO0204	SCO3901
SCO1135	SCO7173
SCO3356	SCO1018
SCO5085	SCO2201
SCO0204	SCO7346
SCO4596	SCO7364
SCO6256	SCO7197
SCO0204	SCO3146
SCO0204	SCO3828
SCO3356	SCO7155
SCO3356	SCO7154
SCO6265	SCO6323
SCO0204	SCO7431
SCO0204	SCO7659
SCO1480	SCO5085
SCO5085	SCO5178
SCO0204	SCO0854
SCO1135	SCO0540
SCO1135	SCO1028
SCO1135	SCO0125
SCO1135	SCO2355
SCO1135	SCO4816
SCO1135	SCO6708
SCO5216	SCO3415
SCO1135	SCO3729
SCO1135	SCO2708
SCO1135	SCO3563
SCO1135	SCO3345
SCO1135	SCO1181
SCO1135	SCO1080
SCO1135	SCO6881
SCO1135	SCO3326
SCO1135	SCO3967
SCO1135	SCO1750
SCO1135	SCO5934
SCO1135	SCO5971
SCO1135	SCO7711
SCO5216	SCO7221
SCO1135	SCO1948
SCO4596	SCO2588
SCO1135	SCO3877
SCO1135	SCO2056
SCO1135	SCO1253
SCO1135	SCO6707
SCO2508	SCO0436
SCO0204	SCO3128
SCO0204	SCO3127
SCO3668	SCO7576
SCO3668	SCO7577
SCO5085	SCO3874
SCO3356	SCO0329
SCO0600	SCO0600
SCO5231	SCO2503
SCO1135	SCO1487
SCO1135	SCO6796
SCO1135	SCO2160
SCO1135	SCO1542
SCO0204	SCO1300
SCO1135	SCO6716
SCO5216	SCO0618
SCO5216	SCO0617
SCO5243	SCO1276
SCO0204	SCO0842
SCO4596	SCO2680
SCO1135	SCO6380
SCO1135	SCO7497
SCO1135	SCO6718
SCO0204	SCO6098
SCO5085	SCO5861
SCO0204	SCO6713
SCO0204	SCO2882
SCO4596	SCO4734
SCO1135	SCO1969
SCO1135	SCO6588
SCO1135	SCO3100
SCO1135	SCO6271
SCO1135	SCO5172
SCO1135	SCO7797
SCO1135	SCO5171
SCO1135	SCO3789
SCO1135	SCO4676
SCO1135	SCO0987
SCO1135	SCO6865
SCO1135	SCO2343
SCO1135	SCO6095
SCO1135	SCO2257
SCO1135	SCO4023
SCO1135	SCO7179
SCO1135	SCO5752
SCO1135	SCO6272
SCO1135	SCO3234
SCO1135	SCO2751
SCO1135	SCO0326
SCO1135	SCO7196
SCO1135	SCO3969
SCO1135	SCO3194
SCO1135	SCO2496
SCO1135	SCO5145
SCO1135	SCO2342
SCO1135	SCO4478
SCO1135	SCO2808
SCO1135	SCO3171
SCO1135	SCO7786
SCO1135	SCO3079
SCO1135	SCO3507
SCO1135	SCO0061
SCO1135	SCO3166
SCO1135	SCO5251
SCO1135	SCO7050
SCO1135	SCO6057
SCO1135	SCO2051
SCO3356	SCO6635
SCO4596	SCO3014
SCO5621	SCO5819
SCO3129	SCO3130
SCO4118	SCO1444
SCO3013	SCO6029
SCO0204	SCO5965
SCO0204	SCO5964
SCO0204	SCO0768
SCO0204	SCO0201
SCO0204	SCO0202
SCO5085	SCO7291
SCO5216	SCO4212
SCO5216	SCO4211
SCO4596	SCO1334
SCO4596	SCO2455
SCO0194	SCO0186
SCO3356	SCO4863
SCO3202	SCO5876
SCO3202	SCO5877
SCO6286	SCO2106
SCO6286	SCO2107
SCO0204	SCO4829
SCO4230	SCO3085
SCO4230	SCO3086
SCO5216	SCO1770
SCO0204	SCO2135
SCO5231	SCO2833
SCO0204	SCO1680
SCO0204	SCO2917
SCO0204	SCO4650
SCO5778	SCO3635
SCO0204	SCO7106
SCO0204	SCO7105
SCO0204	SCO0805
SCO5778	SCO5775
SCO4596	SCO1314
SCO4596	SCO3116
SCO2508	SCO6644
SCO6256	SCO6377
SCO6256	SCO3397
SCO6256	SCO3396
SCO1135	SCO3086
SCO1135	SCO3076
SCO1135	SCO6544
SCO1135	SCO3085
SCO1135	SCO7163
SCO1135	SCO6053
SCO1135	SCO6805
SCO1135	SCO6543
SCO0204	SCO4145
SCO3668	SCO7112
SCO1135	SCO6714
SCO3356	SCO4185
SCO4596	SCO4581
SCO4596	SCO3276
SCO1489	SCO2818
SCO1489	SCO2817
SCO5085	SCO5848
SCO0204	SCO5611
SCO1135	SCO0724
SCO5216	SCO1513
SCO3202	SCO5085
SCO4596	SCO3623
SCO0204	SCO4854
SCO2935	SCO5836
SCO5085	SCO7010
SCO3356	SCO1949
SCO3356	SCO1307
SCO0204	SCO4296
SCO3356	SCO3186
SCO3356	SCO1308
SCO0204	SCO2368
SCO0204	SCO1635
SCO0204	SCO2255
SCO0204	SCO2256
SCO0204	SCO6690
SCO0204	SCO3676
SCO0204	SCO7256
SCO3356	SCO2923
SCO0204	SCO7257
SCO4118	SCO6690
SCO4596	SCO5161
SCO0204	SCO0762
SCO0204	SCO6154
SCO2508	SCO2504
SCO0204	SCO5433
SCO3356	SCO2849
SCO1135	SCO0955
SCO5621	SCO6029
SCO0204	SCO4907
SCO3356	SCO0739
SCO5085	SCO2628
SCO5085	SCO2627
SCO0204	SCO0168
SCO3356	SCO6418
SCO0204	SCO0210
SCO0204	SCO0381
SCO1135	SCO7304
SCO1135	SCO2979
SCO0204	SCO1254
SCO0204	SCO0242
SCO3356	SCO6994
SCO3356	SCO6995
SCO0204	SCO3627
SCO0204	SCO2179
SCO0204	SCO2178
SCO2792	SCO7511
SCO5085	SCO3484
SCO5216	SCO7369
SCO5216	SCO7370
SCO3356	SCO4466
SCO0204	SCO0257
SCO0204	SCO4053
SCO5085	SCO0254
SCO4230	SCO4229
SCO1135	SCO5406
SCO6256	SCO4034
SCO0204	SCO1041
SCO0204	SCO0193
SCO1135	SCO2534
SCO1135	SCO3046
SCO0204	SCO0047
SCO0204	SCO0714
SCO0204	SCO1897
SCO4596	SCO5770
SCO1135	SCO3757
SCO0204	SCO1977
SCO0204	SCO7731
SCO0204	SCO0444
SCO4596	SCO7391
SCO0204	SCO5870
SCO0204	SCO7281
SCO0204	SCO6589
SCO0204	SCO1355
SCO3356	SCO2879
SCO0204	SCO1356
SCO4596	SCO2264
SCO0204	SCO5251
SCO0204	SCO0174
SCO4596	SCO6589
SCO4596	SCO7732
SCO2508	SCO7676
SCO4596	SCO6058
SCO3356	SCO6752
SCO1135	SCO2399
SCO0204	SCO7343
SCO0204	SCO4773
SCO3356	SCO3675
SCO4596	SCO1146
SCO3356	SCO1445
SCO6256	SCO5221
SCO3361	SCO4077
SCO1135	SCO6322
SCO1135	SCO7740
SCO3361	SCO4076
SCO1135	SCO5166
SCO0204	SCO6332
SCO1135	SCO5165
SCO1135	SCO5523
SCO1135	SCO2050
SCO1135	SCO2996
SCO4230	SCO1196
SCO3356	SCO5472
SCO1135	SCO1340
SCO1135	SCO7805
SCO0204	SCO0433
SCO1135	SCO6015
SCO1135	SCO0725
SCO6256	SCO7283
SCO6256	SCO1000
SCO6256	SCO7284
SCO0204	SCO1541
SCO6256	SCO1001
SCO0204	SCO1540
SCO4596	SCO0332
SCO4596	SCO3999
SCO5231	SCO5003
SCO5231	SCO5004
SCO4596	SCO3015
SCO4596	SCO7541
SCO3356	SCO2002
SCO0204	SCO0346
SCO4118	SCO2657
SCO5085	SCO3291
SCO1135	SCO0034
SCO1135	SCO0033
SCO3356	SCO0168
SCO3356	SCO4249
SCO3356	SCO4248
SCO5243	SCO3471
SCO1135	SCO7830
SCO1135	SCO6734
SCO1135	SCO7224
SCO1135	SCO7052
SCO1135	SCO6027
SCO1135	SCO0017
SCO1135	SCO7225
SCO0204	SCO6451
SCO4596	SCO2210
SCO4596	SCO1566
SCO3356	SCO7499
SCO4596	SCO4650
SCO1135	SCO2290
SCO0204	SCO1608
SCO1135	SCO6319
SCO0204	SCO1201
SCO1135	SCO6318
SCO0204	SCO5937
SCO4230	SCO1215
SCO0204	SCO2092
SCO5216	SCO1444
SCO0204	SCO5658
SCO5085	SCO3216
SCO6256	SCO6055
SCO0204	SCO7004
SCO4118	SCO1839
SCO1135	SCO5116
SCO0204	SCO2744
SCO3356	SCO4868
SCO3356	SCO4869
SCO0204	SCO2745
SCO1135	SCO5928
SCO4230	SCO0720
SCO0204	SCO6408
SCO0204	SCO6750
SCO0600	SCO3828
SCO1135	SCO0156
SCO1135	SCO0157
SCO3361	SCO5444
SCO3361	SCO5443
SCO1135	SCO3919
SCO3356	SCO6255
SCO4596	SCO3738
SCO1135	SCO0989
SCO0204	SCO7274
SCO4230	SCO4228
SCO4596	SCO5837
SCO4596	SCO5836
SCO5231	SCO1226
SCO1135	SCO2662
SCO4596	SCO1459
SCO0600	SCO2292
SCO3356	SCO2019
SCO0204	SCO2817
SCO0204	SCO2818
SCO0204	SCO3392
SCO0204	SCO3393
SCO1135	SCO0256
SCO1135	SCO6154
SCO0204	SCO6164
SCO0204	SCO5997
SCO0204	SCO6564
SCO3356	SCO2653
SCO3356	SCO4985
SCO3356	SCO4984
SCO5085	SCO1653
SCO5085	SCO4437
SCO5085	SCO2821
SCO4596	SCO0568
SCO0204	SCO7370
SCO0204	SCO7369
SCO0204	SCO4204
SCO0204	SCO6020
SCO0204	SCO0752
SCO4596	SCO3165
SCO1135	SCO7697
SCO4596	SCO4984
SCO4596	SCO4985
SCO1135	SCO4117
SCO0204	SCO0615
SCO1135	SCO2614
SCO0204	SCO0614
SCO3356	SCO5928
SCO0194	SCO1090
SCO1135	SCO1524
SCO1135	SCO1045
SCO1135	SCO7816
SCO1135	SCO5852
SCO1135	SCO6824
SCO1135	SCO5421
SCO1135	SCO3674
SCO1135	SCO0195
SCO1135	SCO5947
SCO4596	SCO0561
SCO3356	SCO3511
SCO0204	SCO1739
SCO0204	SCO1740
SCO0204	SCO5538
SCO0204	SCO0928
SCO4596	SCO2890
SCO4596	SCO4001
SCO5085	SCO0557
SCO1135	SCO5325
SCO0204	SCO6033
SCO4596	SCO0936
SCO3356	SCO3033
SCO0204	SCO5861
SCO0204	SCO2493
SCO4596	SCO0739
SCO1135	SCO5318
SCO1135	SCO3828
SCO1135	SCO2978
SCO1135	SCO1706
SCO1135	SCO1876
SCO1135	SCO7253
SCO1135	SCO4907
SCO1135	SCO4336
SCO1135	SCO0010
SCO1135	SCO0244
SCO1135	SCO6852
SCO1135	SCO7837
SCO1135	SCO7483
SCO1135	SCO2893
SCO1135	SCO7440
SCO1135	SCO3165
SCO5231	SCO5673
SCO0204	SCOt56
SCO3356	SCO3936
SCO1135	SCO4105
SCO1135	SCO6924
SCO3356	SCO6716
SCO4596	SCO2656
SCO1135	SCO5815
SCO3356	SCO1659
SCO4230	SCO1944
SCO0204	SCO2055
SCO3356	SCO4788
SCO4596	SCO7250
SCO6294	SCO1051
SCO4596	SCO4455
SCO0204	SCO4228
SCO0204	SCO3401
SCO0204	SCO4229
SCO0204	SCO4609
SCO1135	SCO5802
SCO1135	SCO0899
SCO1135	SCO0898
SCO3356	SCO5175
SCO0204	SCO4930
SCO5216	SCO5201
SCO3356	SCO7521
SCO4596	SCO7272
SCO5085	SCO5482
SCO3361	SCO6005
SCO1135	SCO0534
SCO1135	SCO5162
SCO1135	SCO0693
SCO1135	SCO0692
SCO3356	SCO3766
SCO0204	SCO1496
SCO4596	SCO4249
SCO4596	SCO4248
SCO0204	SCO1227
SCO5231	SCO4393
SCO5231	SCO4394
SCO0204	SCO1228
SCO5778	SCO4090
SCO5778	SCO4089
SCO0204	SCO2705
SCO0204	SCO2706
SCO2120	SCO1402
SCO5216	SCO2879
SCO0204	SCO5276
SCO3356	SCO1914
SCO0204	SCO1778
SCO5231	SCO5376
SCO0204	SCO4224
SCO4907	SCO1839
SCO0204	SCO6520
SCO5085	SCO2413
SCO1135	SCO3711
SCO1135	SCO5357
SCO1135	SCO6391
SCO1135	SCO7782
SCO1135	SCO7006
SCO1135	SCO1430
SCO1135	SCO0553
SCO1135	SCO6927
SCO1135	SCO1010
SCO1135	SCO2759
SCO1135	SCO1005
SCO1135	SCO6246
SCO1135	SCO3404
SCO1135	SCO6589
SCO1135	SCO7219
SCO1135	SCO3249
SCO1135	SCOt27
SCO4230	SCO1741
SCO4230	SCO1742
SCO3356	SCO3347
SCO3356	SCO0138
SCO4596	SCO3117
SCO3356	SCO3086
SCO3356	SCO3085
SCO1135	SCO0812
SCO1135	SCO0009
SCO1135	SCO7838
SCO1135	SCO0811
SCO1135	SCO6642
SCO0561	SCO0560
SCO0204	SCO0657
SCO5082	SCO5083
SCO5082	SCO5082
SCO6256	SCO7677
SCO0204	SCO1052
SCO1135	SCO0979
SCO4596	SCO1026
SCO0204	SCO0542
SCO1135	SCO0980
SCO4596	SCO1025
SCO3201	SCO6266
SCO3201	SCO6265
SCO4596	SCO7382
SCO4596	SCO6475
SCO4596	SCO6476
SCO4596	SCO7205
SCO1135	SCO5112
SCO5231	SCO7056
SCO1135	SCO1433
SCO0204	SCO7368
SCO1135	SCO7736
SCO5085	SCO6386
SCO0204	SCO4584
SCO3356	SCO0769
SCO5085	SCO5292
SCO0204	SCO3841
SCO1135	SCO2103
SCO1135	SCO5163
SCO1135	SCO5864
SCO0204	SCO5949
SCO4230	SCO1101
SCO1135	SCO0638
SCO4596	SCO5066
SCO4596	SCO6793
SCO6256	SCO3685
SCO6256	SCO3684
SCO5085	SCO0867
SCO0204	SCO0588
SCO0204	SCO5250
SCO0204	SCO0777
SCO0204	SCO0776
SCO1135	SCO6991
SCO1135	SCO5850
SCO1135	SCO3093
SCO1135	SCO7733
SCO1135	SCO4293
SCO5231	SCO6232
SCO1135	SCO5103
SCO1135	SCO2153
SCO6294	SCO5658
SCO1135	SCO3907
SCO1135	SCO1595
SCO5231	SCO6231
SCO1135	SCO0239
SCO0204	SCO3271
SCO0204	SCO5623
SCO5082	SCO7267
SCO0204	SCO5624
SCO0204	SCO2002
SCO1135	SCO7147
SCO1135	SCO6262
SCO1135	SCO2723
SCO1135	SCO0743
SCO1135	SCO1991
SCO1135	SCO0193
SCO1135	SCO5463
SCO1135	SCO2703
SCO1135	SCO2984
SCO1135	SCO0622
SCO1135	SCO0384
SCO1135	SCO4850
SCO1135	SCO2931
SCO1135	SCO6288
SCO1135	SCO5218
SCO1135	SCO2946
SCO1135	SCO1990
SCO1135	SCO7517
SCO1135	SCO1602
SCO1135	SCO1051
SCO1135	SCO2402
SCO1135	SCO7391
SCO4596	SCO2995
SCO0204	SCO0179
SCO0204	SCO3770
SCO0204	SCO3769
SCO0204	SCO3045
SCO6256	SCO2652
SCO5085	SCO1852
SCO6256	SCO2651
SCO4596	SCO2422
SCO4596	SCO1056
SCO5216	SCO2111
SCO1135	SCO0889
SCO0204	SCO2426
SCO0204	SCO4663
SCO0204	SCO1414
SCO0204	SCO6482
SCO0204	SCO6481
SCO4596	SCO7174
SCO3356	SCO1167
SCO4596	SCO5157
SCO1135	SCO4491
SCO1135	SCO5855
SCO1135	SCO0948
SCO1135	SCO7148
SCO1135	SCO6144
SCO4596	SCO1608
SCO5216	SCO6828
SCO4230	SCO6280
SCO0204	SCO2859
SCO4596	SCO0542
SCO5082	SCO5084
SCO1135	SCO4403
SCO3356	SCO3906
SCO3356	SCO3905
SCO4596	SCO3594
SCO5085	SCO3075
SCO3356	SCO3213
SCO4596	SCO0713
SCO5085	SCO3732
SCO3361	SCO2604
SCO4596	SCO7215
SCO3356	SCO6083
SCO5216	SCO6913
SCO3013	SCO1488
SCO5216	SCO0221
SCO3013	SCO1489
SCO6294	SCO5452
SCO0204	SCO3695
SCO0204	SCO1247
SCO3356	SCO0863
SCO1135	SCO5723
SCO4596	SCO7620
SCO5085	SCO6021
SCO0204	SCO3723
SCO0204	SCO5419
SCO0204	SCO5418
SCO0204	SCO3722
SCO1135	SCO6161
SCO1135	SCO5048
SCO1135	SCO1013
SCO1135	SCO7791Weak
SCO1135	SCO2510
SCO1135	SCO5047
SCO1135	SCO3122
SCO1135	SCO3074
SCO0204	SCO7087
SCO0204	SCO6723
SCO5085	SCO1468
SCO3356	SCO2566
SCO3356	SCO7631
SCO4596	SCO3657
SCO0204	SCO3858
SCO5085	SCO7487
SCO0204	SCO3334
SCO0204	SCO6485
SCO5216	SCO4105
SCO1135	SCO3045
SCO1135	SCO1289
SCO1135	SCO4520
SCO1135	SCO6299
SCO1135	SCO3355
SCO1135	SCO2191
SCO0204	SCO2066
SCO0204	SCO3557
SCO3202	SCO5556
SCO0204	SCO6085
SCO0204	SCO6086
SCO6294	SCO1156
SCO4596	SCO3042
SCO0204	SCO2234
SCO0204	SCO2235
SCO3356	SCO3042
SCO5085	SCO4482
SCO3202	SCO1107
SCO0204	SCO5171
SCO4596	SCO0452
SCO4596	SCO0451
SCO0204	SCO4689
SCO0204	SCO1724
SCO5216	SCO0725
SCO5231	SCO5954
SCO0204	SCO1723
SCO0204	SCO7051
SCO0204	SCO0177
SCO1135	SCO1451
SCO5820	SCO1321
SCO1135	SCO2609
SCO1135	SCO4691
SCO0204	SCO6820
SCO1135	SCO0420
SCO3356	SCO5473
SCO4596	SCO0286
SCO4596	SCO0287
SCO5085	SCO6164
SCO5216	SCO2368
SCO3356	SCO2422
SCO1135	SCO3145
SCO0194	SCO5455
SCO1135	SCO5310
SCO1135	SCO0131
SCO1135	SCO2188
SCO3361	SCO0431
SCO0204	SCO6272
SCO0204	SCO6271
SCO4596	SCO4105
SCO6294	SCO1373
SCO2792	SCO1423
SCO1135	SCO2330
SCO5085	SCO3215
SCO0204	SCO2183
SCO3356	SCO5687
SCO6286	SCO6890
SCO4596	SCO2616
SCO4596	SCO2615
SCO3356	SCO3858
SCO2935	SCO4178
SCO4596	SCO3968
SCO3668	SCO7138
SCO6294	SCO5808
SCO1135	SCO1255
SCO0204	SCO1820
SCO6974	SCO7677
SCO4596	SCO4580
SCO3356	SCO5310
SCO4596	SCO4083
SCO0204	SCO0367
SCO0204	SCO0131
SCO1135	SCO6990
SCO1135	SCO0522
SCO4596	SCO1565
SCO0204	SCO3491
SCO0204	SCO2182
SCO4596	SCO4688
SCO0204	SCO6686
SCO4596	SCO4254
SCO4118	SCO5445
SCO5085	SCO4584
SCO5085	SCO3246
SCO1135	SCO6033
SCO0204	SCO1432
SCO4596	SCO0367
SCO0204	SCO5854
SCO5085	SCO0917
SCO5085	SCO0916
SCO0204	SCO2951
SCO0204	SCO7216
SCO0561	SCO0562
SCO0194	SCO0191
SCO4596	SCO5005
SCO0204	SCO2146
SCO5231	SCO1117
SCO0204	SCO3894
SCO4118	SCO5028
SCO4596	SCO3030
SCO0204	SCO5005
SCO1135	SCO7605
SCO1135	SCO7378
SCO1135	SCO4002
SCO1135	SCO7606
SCO1135	SCO2314
SCO1135	SCO5716
SCO1135	SCO7379
SCO6256	SCO0246
SCO0600	SCO7129
SCO3356	SCO0137
SCO4596	SCO5208
SCO0600	SCO7130
SCO0204	SCO2282
SCO0204	SCOt27
SCO0204	SCO3249
SCO0204	SCO6976
SCO0194	SCO3719
SCO1135	SCO0385
SCO0194	SCO4963
SCO1135	SCO3004
SCO0204	SCO1628
SCO0204	SCO6333
SCO0204	SCO5325
SCO1576	SCO3629
SCO3356	SCO7629
SCO4596	SCO0203
SCO5216	SCO7503
SCO0204	SCO4151
SCO4596	SCO1069
SCO6294	SCO2101
SCO0204	SCO0194
SCO1135	SCO2348
SCO3356	SCO1633
SCO5778	SCO6198
SCO0204	SCO4297
SCO5085	SCO7605
SCO0204	SCO1973
SCO0204	SCO1974
SCO5231	SCO7263
SCO0600	SCO4981
SCO0204	SCO0990
SCO1135	SCO1653
SCO0204	SCO0142
SCO0204	SCO4503
SCO4230	SCO3078
SCO4230	SCO3077
SCO4596	SCO4288
SCO4596	SCO1395
SCO1135	SCO4918
SCO1135	SCO4919
SCO0204	SCO2195
SCO5085	SCO4562
SCO1135	SCO1963
SCO1135	SCO6894
SCO1135	SCO0197
SCO0204	SCO5770
SCO3356	SCO4821
SCO3356	SCO3749
SCO4230	SCO4761
SCO3356	SCO4866
SCO0204	SCO0156
SCO4596	SCO0210
SCO3356	SCO1954
SCO0204	SCO7003
SCO0204	SCO2682
SCO1135	SCO4220
SCO1135	SCO7037
SCO1135	SCO7479
SCO1135	SCO2270
SCO1135	SCO3813
SCO0204	SCO1445
SCO0204	SCO5814
SCO5778	SCO5774
SCO6294	SCO2380
SCO0204	SCO3431
SCO1135	SCO3260
SCO1135	SCO5297
SCO1135	SCO5296
SCO1135	SCO5595
SCO1135	SCO0350
SCO0204	SCO4812
SCO3356	SCO5950
SCO0204	SCO4813
SCO0204	SCO0157
SCO3356	SCO4343
SCO3356	SCO5286
SCO4596	SCO2679
SCO5216	SCO5157
SCO5778	SCO5580
SCO0204	SCO3831
SCO0204	SCO3832
SCO6294	SCO6053
SCO6294	SCO6598
SCO3356	SCO4827
SCO4118	SCO4020
SCO4118	SCO5376
SCO1135	SCO0503
SCO1135	SCO5333
SCO4596	SCO2046
SCO1135	SCO3312
SCO4596	SCO6057
SCO5085	SCO4151
SCO0204	SCO1415
SCO4596	SCO2451
SCO0204	SCO4929
SCO3356	SCO4144
SCO4596	SCO2282
SCO1135	SCO6290
SCO1135	SCO0427
SCO1135	SCO1432
SCO1135	SCO1365
SCO1135	SCO3003
SCO3356	SCO1837
SCO1135	SCO6044
SCO4596	SCO5065
SCO0204	SCO5621
SCO0204	SCO7332
SCO0204	SCO4599
SCO4596	SCO1657
SCO6256	SCO4646
SCO0204	SCO6670
SCO0204	SCO7390
SCO4596	SCO2790
SCO1135	SCO5988
SCO1135	SCO3822
SCO1135	SCO2495
SCO6256	SCO3415
SCO1135	SCO4693
SCO6256	SCO3414
SCO0204	SCO1459
SCO3063	SCO5769
SCO4230	SCO3324
SCO1135	SCO4455
SCO1135	SCO5917
SCO1135	SCO3056
SCO1135	SCO2889
SCO4596	SCO2316
SCO1135	SCO7413
SCO1135	SCO7327
SCO1135	SCO3886
SCO1135	SCO3768
SCO1135	SCO4688
SCO4230	SCO7188
SCO1135	SCO3749
SCO1135	SCO7111
SCO1135	SCO0990
SCO0204	SCO3171
SCO4596	SCO0974
SCO1135	SCO1119
SCO1135	SCO6725
SCO1135	SCO3893
SCO1135	SCO4763
SCO0204	SCO5967
SCO1135	SCO4159
SCO1135	SCO6519
SCO4596	SCO7345
SCO1135	SCO4421
SCO1135	SCO0461
SCO0204	SCO5966
SCO4596	SCO5823
SCO3356	SCO2709
SCO0204	SCO3529
SCO3356	SCO5802
SCO3356	SCO7310
SCO1135	SCO1302
SCO1135	SCO3311
SCO1135	SCO6446
SCO1135	SCO4947
SCO1135	SCO3659
SCO1135	SCO0714
SCO1135	SCO0110
SCO1135	SCO3913
SCO1135	SCO0111
SCO1135	SCO4457
SCO1135	SCO0583
SCO1135	SCO5028
SCO1135	SCO2005
SCO1135	SCO6435
SCO1135	SCO4092
SCO1135	SCO1368
SCO1135	SCO7604
SCO1135	SCO6965
SCO1135	SCO0588
SCO1135	SCO1369
SCO1135	SCO6635
SCO1135	SCO7603
SCO1135	SCO1001
SCO0194	SCO0194
SCO6286	SCO4774
SCO4596	SCO4270
SCO5216	SCO5626
SCO3356	SCO7345
SCO4596	SCO5202
SCO1135	SCO6254
SCO1135	SCO1037
SCO1135	SCO2013
SCO1135	SCO7204
SCO1135	SCO6289
SCO1135	SCO5210
SCO1135	SCO2438
SCO1135	SCO3013
SCO1135	SCO4553
SCO1135	SCO1648
SCO1135	SCO6025
SCO1135	SCO6396
SCO1135	SCO3325
SCO1135	SCO7238
SCO1135	SCO5583
SCO1135	SCO4552
SCO3356	SCO0213
SCO3356	SCO0214
SCO0204	SCO1402
SCO4596	SCO5802
SCO3356	SCO1166
SCO1135	SCO6191
SCO5085	SCO0900
SCO1135	SCO3939
SCO0204	SCO2920
SCO1135	SCO5549
SCO0204	SCO2921
SCO1135	SCO0142
SCO1135	SCOt08
SCO1135	SCO1676
SCO1135	SCO0143
SCO4596	SCO3779
SCO5085	SCO3910
SCO5085	SCO3911
SCO5085	SCO3918
SCO5216	SCO4785
SCO4230	SCO6062
SCO4596	SCO0525
SCO4596	SCO1353
SCO0204	SCO2099
SCO0204	SCO4820
SCO1135	SCO2594
SCO5231	SCO2672
SCO4596	SCO4186
SCO3356	SCO5056
SCO5778	SCO2804
SCO3356	SCO7426
SCO3356	SCO7427
SCO0204	SCO2369
SCO3356	SCO0897
SCO4596	SCO3598
SCO3356	SCO5105
SCO1135	SCO4479
SCO1135	SCO2776
SCO1135	SCO1954
SCO1135	SCO7329
SCO1135	SCO7330
SCO3356	SCO5358
SCO0204	SCO3820
SCO0204	SCO4883
SCO3356	SCO1836
SCO4596	SCO1147
SCO3356	SCO5952
SCO4596	SCO6933
SCO0204	SCO1865
SCO0204	SCO0345
SCO0561	SCO0561
SCO4596	SCO1827
SCO3356	SCO7515
SCO0204	SCO2089
SCO0204	SCO5841
SCO0204	SCO7648
SCO4596	SCO3356
SCO0204	SCO1099
SCO0204	SCO1100
SCO1135	SCO0415
SCO5216	SCO2620
SCO3356	SCO3165
SCO4596	SCO0153
SCO4596	SCO1559
SCO1135	SCO0805
SCO1135	SCO3542
SCO1135	SCO2118
SCO1135	SCO2617
SCO5216	SCO6481
SCO4596	SCO0419
SCO3356	SCO5289
SCO1135	SCO6338
SCO1135	SCO6339
SCO1135	SCO6643
SCO1135	SCO1026
SCO1135	SCO1025
SCO3356	SCO2907
SCO5085	SCO7058
SCO1135	SCO7631
SCO4596	SCO6572
SCO3356	SCO5773
SCO3361	SCO2003
SCO3361	SCO2004
SCO1135	SCO0138
SCO1135	SCO5541
SCO1135	SCO3493
SCO1135	SCO2162
SCO5216	SCO3323
SCO1135	SCO2882
SCO1135	SCO5459
SCO1135	SCO6797
SCO1135	SCO2583
SCO1135	SCO3529
SCO1135	SCO2156
SCO1135	SCO7563
SCO1135	SCO0992
SCO1135	SCO2157
SCO1135	SCO6066
SCO0204	SCO4579
SCO3361	SCO0432
SCO0204	SCO4818
SCO3356	SCO0869
SCO4596	SCO2540
SCO4596	SCO1240
SCO3356	SCO0864
SCO4596	SCO5056
SCO3356	SCO3323
SCO4596	SCO7369
SCO4596	SCO3079
SCO0204	SCO0676
SCO1135	SCO6806
SCO1135	SCO5754
SCO1135	SCO4614
SCO1135	SCO6478
SCO1135	SCOt48
SCO0204	SCO5474
SCO0204	SCO5292
SCO4230	SCO5039
SCO1135	SCO6005
SCO1135	SCO0667
SCO1135	SCO6756
SCO1135	SCO6685
SCO1135	SCO1459
SCO1135	SCO0930
SCO1135	SCO1901
SCO1135	SCO1864
SCO1135	SCO3476
SCO1135	SCO4443
SCO1135	SCO0694
SCO1135	SCO3464
SCO1135	SCO5591
SCO1135	SCO0931
SCO1135	SCO1863
SCO1135	SCO6181
SCO1135	SCO5584
SCO1135	SCO3170
SCO4596	SCO2631
SCO4596	SCO2630
SCO0204	SCO6937
SCO1135	SCO7130
SCO4596	SCO4037
SCO1135	SCO7129
SCO0204	SCO3342
SCO0204	SCO7391
SCO5216	SCO6973
SCO0204	SCO2614
SCO0204	SCO1595
SCO3356	SCO4027
SCO3356	SCO4028
SCO1135	SCO4591
SCO1135	SCO4590
SCO3356	SCO7204
SCO3356	SCO7205
SCO0204	SCO4589
SCO0204	SCO4275
SCO0204	SCO2688
SCO1135	SCO7053
SCO0204	SCO7740
SCO0204	SCO1072
SCO0204	SCO0758
SCO5085	SCO7818
SCO3356	SCO4634
SCO3356	SCOt49
SCO0204	SCO7599
SCO1135	SCO0808
SCO0204	SCO4027
SCO0204	SCO5105
SCO4596	SCO6344
SCO4596	SCO6345
SCO1135	SCO6281
SCO1135	SCO6778
SCO0194	SCO0178
SCO1135	SCO0060
SCO4596	SCO4666
SCO4596	SCO4667
SCO0204	SCO5146
SCO3356	SCO7260
SCO4230	SCO7638
SCO1135	SCO6349
SCO0204	SCO5555
SCO4230	SCO7639
SCO4596	SCO6713
SCO1135	SCO4670
SCO1135	SCO4575
SCO4596	SCO6601
SCO1135	SCO2394
SCO0204	SCO7203
SCO4596	SCO7772
SCO4596	SCO4785
SCO0204	SCO2942
SCO3356	SCO4859
SCO3361	SCO5660
SCO3356	SCO2677
SCO1135	SCO0895
SCO5085	SCO0238
SCO3356	SCO3246
SCO5085	SCO0908
SCO4596	SCO0986
SCO5085	SCO0907
SCO3356	SCO0191
SCO0204	SCO7736
SCO1135	SCO1301
SCO5243	SCO1541
SCO3668	SCO7586
SCO0204	SCO1047
SCO4596	SCO0374
SCO0204	SCO7102
SCO6974	SCO4289
SCO3356	SCO3863
SCO4596	SCO5433
SCO1135	SCO7632
SCO1135	SCO3732
SCO0204	SCO0515
SCO4596	SCO2130
SCO1135	SCO2392
SCO4596	SCO2192
SCO0204	SCO2923
SCO0204	SCO3874
SCO4596	SCO5364
SCO0204	SCO2263
SCO5085	SCO2104
SCO0204	SCO1013
SCO3013	SCO0549
SCO0204	SCO2562
SCO3356	SCO3529
SCO3356	SCO1536
SCO0204	SCO4633
SCO4596	SCOt30
SCO4230	SCO5410
SCO4596	SCO4790
SCO4596	SCO4791
SCO0204	SCO2174
SCO1135	SCO2838
SCO1135	SCO2389
SCO1135	SCO2407
SCO1135	SCO2128
SCO3356	SCO3834
SCO1135	SCO7026
SCO1135	SCO4731
SCO1135	SCO7025
SCO1135	SCO1738
SCO0204	SCO2570
SCO0204	SCO1983
SCO0204	SCO3593
SCO6294	SCO3697
SCO0204	SCO4580
SCO0194	SCO5583
SCO3356	SCO1529
SCO0204	SCO2153
SCO0204	SCO1932
SCO0194	SCO2625
SCO6256	SCO4645
SCO6256	SCOt51
SCO6256	SCO7215
SCO6256	SCO7216
SCO6256	SCO4394
SCO0204	SCO7632
SCO3356	SCO7081
SCO4596	SCO3167
SCO4596	SCO3168
SCO3356	SCO6013
SCO0204	SCO1500
SCO0204	SCO5043
SCO3356	SCOt31
SCO4596	SCO5589
SCO3356	SCO1544
SCO0204	SCO1847
SCO4596	SCO1013
SCO5085	SCO2425
SCO0204	SCO3083
SCO0204	SCO0051
SCO3356	SCO3828
SCO5085	SCO6716
SCO4596	SCO5997
SCO3356	SCO7170
SCO3356	SCO1608
SCO6256	SCO2841
SCO3356	SCO0861
SCO0204	SCO5311
SCO0204	SCO7081
SCO0204	SCO1908
SCO4596	SCO3287
SCO0204	SCO3768
SCO3361	SCO1999
SCO0204	SCO4447
SCO0204	SCO6990
SCO4596	SCO7201
SCO1135	SCO3346
SCO5085	SCO0028
SCO5085	SCO5056
SCO5085	SCO6485
SCO4230	SCO1225
SCO4230	SCO1224
SCO0204	SCO5414
SCO4596	SCO0515
SCO0194	SCO4553
SCO0194	SCO4552
SCO4596	SCO0844
SCO4596	SCO2089
SCO6294	SCO7404
SCO0204	SCO6787
SCO0204	SCO0213
SCO5085	SCO2653
SCO0204	SCO0214
SCO6294	SCO5202
SCO1135	SCO2556
SCO1135	SCO3402
SCO1135	SCO2555
SCO1135	SCO3523
SCO1135	SCO5770
SCO1135	SCO1582
SCO3356	SCO5949
SCO4230	SCO7515
SCO4596	SCO5724
SCO5216	SCO0863
SCO0204	SCO4771
SCO3356	SCO6428
SCO5085	SCO1382
SCO4596	SCO1263
SCO5085	SCO5599
SCO1135	SCO2624
SCO1135	SCO2625
SCO1135	SCO0423
SCO0204	SCO1836
SCO1135	SCO5356
SCO0204	SCO1837
SCO4230	SCO1346
SCO4230	SCO1347
SCO4596	SCO0676
SCO3356	SCO7378
SCO3356	SCO7379
SCO5082	SCO0156
SCO3356	SCO6130
SCO5216	SCO0303
SCO3356	SCO4399
SCO3356	SCO4398
SCO1135	SCO4041
SCO0204	SCO2231
SCO3356	SCO4145
SCO4230	SCO6564
SCO0204	SCO0525
SCO4596	SCO7384
SCO3668	SCO1893
SCO4118	SCO4893
SCO1135	SCO7663
SCO1135	SCO4729
SCO4118	SCO4398
SCO4596	SCO5979
SCO4118	SCO4399
SCO0204	SCO6963
SCO6294	SCO2018
SCO5085	SCO4614
SCO1135	SCO0240
SCO1135	SCO0241
SCO5085	SCO3201
SCO0204	SCO7714
SCO0204	SCO2602
SCO5085	SCO5873
SCO1135	SCO0592
SCO1576	SCO4293
SCO3201	SCO1875
SCO1135	SCO0290
SCO1135	SCO0289
SCO5778	SCO5451
SCO3356	SCO2678
SCO4596	SCO7631
SCO4596	SCO6750
SCO4230	SCO3796
SCO4596	SCO7370
SCO5085	SCO4144
SCO0600	SCO1028
SCO0204	SCO2607
SCO1135	SCO3375
SCO5085	SCO2923
SCO5085	SCO5768
SCO5085	SCO5769
SCO4596	SCO3858
SCO0204	SCO2094
SCO4230	SCO4959
SCO1135	SCO7459
SCO4596	SCO0921
SCO5243	SCO3395
SCO3356	SCO6475
SCO0600	SCO3188
SCO3356	SCO3628
SCO0204	SCO1593
SCO4596	SCO7383
SCO0204	SCO0811
SCO4596	SCO2709
SCO1135	SCO1052
SCO5216	SCO1052
SCO4596	SCO1631
SCO0204	SCO7358
SCO4596	SCO2156
SCO4596	SCO2157
SCO5243	SCO6510
SCO0194	SCO4133
SCO5085	SCO0216
SCO0204	SCO4900
SCO0204	SCO6162
SCO0204	SCO2974
SCO5216	SCO6562
SCO6294	SCO2247
SCO6294	SCO2248
SCO0204	SCO2961
SCO4230	SCO2656
SCO0194	SCO2824
SCO4230	SCO2655
SCO1135	SCO4684
SCO3356	SCO7104
SCO0204	SCO2753
SCO0204	SCO2752
SCO5231	SCO3975
SCO0204	SCO3693
SCO3356	SCO4590
SCO0204	SCO1243
SCO0204	SCO1244
SCO3356	SCO4591
SCO1135	SCO4579
SCO0204	SCO5573
SCO0561	SCO0779
SCO0204	SCO4652
SCO0204	SCO1707
SCO5216	SCO5167
SCO0204	SCO4863
SCO3356	SCO5262
SCO3361	SCO7600
SCO3668	SCO2599
SCO1135	SCO7710
SCO0204	SCO3729
SCO0204	SCO3730
SCO1135	SCO6309
SCO1135	SCO5378
SCO1135	SCO3609
SCO1135	SCO5379
SCO1135	SCO1957
SCO1135	SCO3297
SCO1135	SCOt21
SCO1135	SCO4161
SCO1135	SCO0777
SCO0204	SCO3310
SCO0204	SCO3309
SCO3356	SCO7382
SCO3129	SCO4590
SCO4118	SCO3176
SCO3356	SCO2965
SCO0204	SCO7679
SCO0204	SCO5378
SCO4596	SCO0895
SCO1135	SCO6694
SCO1135	SCO3649
SCO1135	SCO6834
SCO3356	SCO5070
SCO1135	SCO7191
SCO1135	SCO5412
SCO1135	SCO7192
SCO0204	SCO1444
SCO4159	SCO4292
SCO1135	SCO7460
SCO3361	SCO4212
SCO4596	SCO2059
SCO5085	SCO7421
SCO5085	SCO4202
SCO0204	SCO6685
SCO4596	SCO0978
SCO4230	SCO5794
SCO0204	SCO2162
SCO0204	SCO3574
SCO0204	SCO2161
SCO0204	SCO4393
SCO5085	SCO1503
SCO4596	SCO3216
SCO0204	SCO4394
SCO5085	SCO1504
SCO1135	SCO0636
SCO3361	SCO1609
SCO1135	SCO5402
SCO3356	SCO3931
SCO3356	SCO6909
SCO4596	SCO5624
SCO4596	SCO5004
SCO3356	SCO1473
SCO1135	SCO3101
SCO1135	SCO2914
SCO4596	SCO7548
SCO4596	SCO3063
SCO1135	SCO7287
SCO1135	SCO3222
SCO2935	SCO6271
SCO1135	SCO4163
SCO1135	SCO6770
SCO2935	SCO6272
SCO1135	SCO2187
SCO1135	SCO7376
SCO1135	SCO5551
SCO1135	SCO4341
SCO4118	SCO2197
SCO5085	SCO4146
SCO4118	SCO2198
SCO6286	SCO7740
SCO5778	SCO2999
SCO3356	SCO0999
SCO5082	SCO6631
SCO0204	SCO1428
SCO3356	SCO7051
SCO0204	SCO1371
SCO1135	SCO0722
SCO1135	SCO6242
SCO1135	SCO7299
SCO1135	SCO0908
SCO1135	SCO4042
SCO1135	SCO1158
SCO1135	SCO2885
SCO1135	SCO7298
SCO1135	SCO1707
SCO1135	SCO3628
SCO1135	SCO6666
SCO2958	SCO5847
SCO2958	SCO5846
SCO4596	SCO0345
SCO4596	SCO4764
SCO0204	SCO1800
SCO5085	SCO3495
SCO0204	SCO3530
SCO1135	SCO7444
SCO3356	SCO0216
SCO0194	SCO5728
SCO4596	SCO4784
SCO5216	SCO1443
SCO5085	SCO7467
SCO3356	SCO7718
SCO5216	SCO4330
SCO5085	SCO5149
SCO5216	SCO3324
SCO5216	SCO6040
SCO0204	SCO2223
SCO1135	SCO6705
SCO3356	SCO5581
SCO3356	SCO2288
SCO3356	SCO2289
SCO0204	SCO0841
SCO2935	SCO3867
SCO0204	SCO1796
SCO0204	SCO3355
SCO6294	SCO6706
SCO3356	SCO0700
SCO0204	SCO6456
SCO0204	SCO6457
SCO0204	SCO7424
SCO1135	SCO0515
SCO1135	SCO4601
SCO1135	SCO3042
SCO1135	SCO7445
SCO0204	SCO7220
SCO1135	SCO0905
SCO0204	SCO6374
SCO3356	SCO7556
SCO5085	SCO3084
SCO0204	SCO3375
SCO0204	SCO2213
SCO5085	SCO7120
SCO0204	SCO3311
SCO3356	SCO4135
SCO0204	SCO2226
SCO0204	SCO0039
SCO0204	SCO0038
SCO4596	SCO0982
SCO0204	SCO0675
SCO0204	SCO4198
SCO3356	SCO7716
[truncated: 21,909 more rows]

## Sheet: Inferred_Exp
TF	TG
SCO5071	SCO5075
SCO5877	SCO5878
SCO5071	SCO5090
SCO5071	SCO5089
SCO5071	SCO5073
SCO0204	SCO0213
SCO5877	SCO5887
SCO0204	SCO0174
SCO5877	SCO5890
SCO0204	SCO0212
SCO0204	SCO0210
SCO0204	SCO0216
SCO0608	SCO0607
SCO0204	SCO0217
SCO5570	SCO5592
SCO0204	SCO0200
SCO0204	SCO0215
SCO5877	SCO5879
SCO5570	SCO5571
SCO0204	SCO6041
SCO5804	SCO5805
SCO0204	SCO0219
SCO5570	SCO5572
SCO3323	SCO1627
SCO5071	SCO5081
SCO0204	SCO0201
SCO5570	SCO1998
SCO5877	SCO5895
SCO5217	SCO5216
SCO5570	SCO4735
SCO6008	SCO6009
SCO3323	SCO1474
SCO0204	SCO0197
SCO5570	SCO1600
SCO5877	SCO5889
SCO5216	SCO5217
SCO5570	SCO1491
SCO5570	SCO4734
SCO5570	SCO4647
SCO5085	SCO6992
SCO3320	SCO4079
SCO3323	SCO1626
SCO0204	SCO0198
SCO0204	SCO0199
SCO0204	SCO0218
SCO3323	SCO6797
SCO2792	SCO3904
SCO5570	SCO4727
SCO5071	SCO5077
SCO5071	SCO5074
SCO5082	SCO1909
SCO0204	SCO4689
SCO6008	SCO6010
SCO5570	SCO4723
SCO4180	SCO2615
SCO3323	SCO1860
SCO4159	SCO2593
SCO5570	SCO4728
SCO1480	SCO4441
SCO3320	SCO3318
SCO5877	SCO5886
SCO4180	SCO5744
SCO5570	SCO3881
SCO5582	SCO4920
SCO0204	SCO0208
SCO5071	SCO5078
SCO3323	SCO5177
SCO5085	SCO1773
SCO3859	SCO2969
SCO3202	SCO2167
SCO0608	SCO4225
SCO1576	SCO1580
SCO5570	SCO5591
SCO3323	SCO5390
SCO5570	SCO3907
SCO5570	SCO3880
SCO6008	SCO6011
SCO5570	SCO4729
SCO0204	SCO7511
SCO5260	SCO5259
SCO3323	SCO1674
SCO4180	SCO3792
SCO5570	SCO2597
SCO3668	SCO3670
SCO5071	SCO5087
SCO3063	SCO3062
SCO3356	SCO6722
SCO2792	SCO5837
SCO5570	SCO4636
SCO0194	SCO0186
SCO5820	SCO5357
SCO5071	SCO5085
SCO5877	SCO5888
SCO1576	SCO1570
SCO5085	SCO5071
SCO5877	SCO5898
SCO5552	SCO5554
SCO5570	SCO4646
SCO4180	SCO2051
SCO5819	SCO5827
SCO4180	SCO3961
SCO0204	SCO6042
SCO3571	SCO5627
SCO5570	SCO4561
SCO3859	SCO5547
SCO0204	SCO3945
SCO3323	SCO6796
SCO5570	SCO2596
SCO0204	SCO0220
SCO3323	SCO4768
SCO4180	SCO1509
SCO5071	SCO5079
SCO5570	SCO4648
SCO3320	SCO4814
SCO0608	SCO1699
SCO5071	SCO5080
SCO4180	SCO4179
SCO5570	SCO4725
SCO5582	SCO7252
SCO1489	SCO1479
SCO3571	SCO5292
SCO3320	SCO4068
SCO1489	SCO5545
SCO3320	SCO3319
SCO2950	SCO4328
SCO2140	SCO5809
SCO0204	SCO0177
SCO5570	SCO5029
SCO2950	SCO3409
SCO1576	SCO1578
SCO5085	SCO2519
SCO2792	SCO0525
SCO5570	SCO4718
SCO5071	SCO5084
SCO3375	SCO2843
SCO4180	SCO3629
SCO2792	SCO3571
SCO4180	SCO3795
SCO5570	SCO5370
SCO5570	SCO1598
SCO4180	SCO4333
SCO3202	SCO2168
SCO2140	SCO5843
SCO4180	SCO1651
SCO3571	SCO2792
SCO1489	SCO3405
SCO0204	SCO3182
SCO3320	SCO4475
SCO5085	SCO4187
SCO4159	SCO2594
SCO3571	SCO5626
SCO3323	SCO1630
SCO0204	SCO0214
SCO4180	SCO1502
SCO5570	SCO5544
SCO5570	SCO5373
SCO5071	SCO5088
SCO3320	SCO5281
SCO5570	SCO5372
SCO5820	SCO6001
SCO3549	SCO5724
SCO3668	SCO3669
SCO3320	SCO3092
SCO3320	SCO4472
SCO5570	SCO1517
SCO4180	SCO3347
SCO3571	SCO5293
SCO3320	SCO4470
SCO5570	SCO5371
SCO3571	SCO5514
SCO4180	SCO3303
SCO5570	SCO2620
SCO5082	SCO4266
SCO0204	SCO0168
SCO0204	SCO4690
SCO5570	SCO5368
SCO5877	SCO5897
SCO3323	SCO6795
SCO3571	SCO5499
SCO0194	SCO0185
SCO3320	SCO5409
SCO5570	SCO1594
SCO2792	SCO1489
SCO2792	SCO3569
SCO5582	SCO1943
SCO2140	SCO6312
SCO5570	SCO5736
SCO4180	SCO1601
SCO3571	SCO4068
SCO3320	SCO4077
SCO4180	SCO2614
SCO4180	SCO5813
SCO5570	SCO5293
SCO5570	SCO1516
SCO2792	SCO2884
SCO4180	SCO2951
SCO1480	SCO6128
SCO0608	SCO1700
SCO4180	SCO6060
SCO4180	SCO1508
SCO5570	SCO5593
SCO5570	SCO5705
SCO3375	SCO4955
SCO5570	SCO2563
SCO5570	SCO5595
SCO5570	SCO3124
SCO5570	SCO4701
SCO2140	SCO4180
SCO5570	SCO4282
SCO5570	SCO4722
SCO1576	SCO1577
SCO5877	SCO5894
SCO3549	SCO4411
SCO5819	SCO5826
SCO3320	SCO4723
SCO2950	SCO5409
SCO3859	SCO3678
SCO3571	SCO4687
SCO4907	SCO1509
SCO3320	SCO4078
SCO4180	SCO6031
SCO4180	SCO5059
SCO5085	SCO7460
SCO3320	SCO7000
SCO5819	SCO3350
SCO4180	SCO2301
SCO2792	SCO7404
SCO5243	SCO5244
SCO5570	SCO4716
SCO5570	SCO4654
SCO0204	SCO0171
SCO5877	SCO5891
SCO5570	SCO4858
SCO2140	SCO4178
SCO4180	SCO1818
SCO5820	SCO3404
SCO4180	SCO2972
SCO3571	SCO5501
SCO5570	SCO7510
SCO5085	SCO5877
SCO5582	SCO3618
SCO2792	SCO4859
SCO3323	SCO6394
SCO4180	SCO4161
SCO5085	SCO1089
SCO0204	SCO0207
SCO4180	SCO3820
SCO3323	SCO1629
SCO5085	SCO4189
SCO3320	SCO4770
SCO3668	SCO3671
SCO5260	SCO4240
SCO4228	SCO1906
SCO5570	SCO4702
SCO2792	SCO2357
SCO5405	SCO5728
SCO0194	SCO0190
SCO5071	SCO5083
SCO5552	SCO5553
SCO0204	SCO0203
SCO0204	SCO3946
SCO3571	SCO3901
SCO3571	SCO1798
SCO3859	SCO5512
SCO5570	SCO4653
SCO4159	SCO5515
SCO0204	SCO0173
SCO3571	SCO5291
SCO4180	SCO1439
SCO3859	SCO2504
SCO5570	SCO5624
SCO5570	SCO4719
SCO3571	SCO1945
SCO4907	SCO1818
SCO5071	SCO5072
SCO3571	SCO5498
SCO4180	SCO1808
SCO1489	SCO2792
SCO4180	SCO3067
SCO5260	SCO2920
SCO5570	SCO4649
SCO0194	SCO0187
SCO5570	SCO5625
SCO5085	SCO5415
SCO5570	SCO1599
SCO4180	SCO5812
SCO1576	SCO6755
SCO5085	SCO3051
SCO2140	SCO3822
SCO3859	SCO2968
SCO2140	SCO2916
SCO3323	SCO1628
SCO5570	SCO4726
SCO4180	SCO1501
SCO4180	SCO4797
SCO4180	SCO3576
SCO4180	SCO4559
SCO3571	SCO0513
SCO5570	SCO4730
SCO1480	SCO2368
SCO3323	SCO5176
SCO4180	SCO3858
SCO5877	SCO5896
SCO3358	SCO3356
SCO5877	SCO5880
SCO4180	SCO1018
SCO4180	SCO1438
SCO2140	SCO3856
SCO5723	SCO3852
SCO4180	SCO4958
SCO3859	SCO6758
SCO3549	SCO5725
SCO5570	SCO2136
SCO5570	SCO1595
SCO3571	SCO3877
SCO5570	SCO4705
SCO5260	SCO5229
SCO2950	SCO0204
SCO5570	SCO4707
SCO1489	SCO4854
SCO0204	SCO0211
SCO5582	SCO4442
SCO4180	SCO2140
SCO5570	SCO5281
SCO5216	SCO4956
SCO5570	SCO5513
SCO3859	SCO4352
SCO3202	SCO2723
SCO4180	SCO4041
SCO0204	SCO0167
SCO4180	SCO5488
SCO2140	SCO5698
SCO3320	SCO3317
SCO3571	SCO4645
SCO4180	SCO1947
SCO5570	SCO4720
SCO4180	SCO2061
SCO5570	SCO1515
SCO4159	SCO2592
SCO2792	SCO3808
SCO5260	SCO5115
SCO4180	SCO4966
SCO3571	SCO5628
SCO3320	SCO3184
SCO3320	SCO5867
SCO5570	SCO5543
SCO5082	SCO5084
SCO3859	SCO4469
SCO5570	SCO4713
SCO0194	SCO0189
SCO5582	SCO5460
SCO3571	SCO4366
SCO5082	SCO5083
SCO1576	SCO5552
SCO4180	SCO5699
SCO4425	SCO0393
SCO1576	SCO7036
SCO1839	SCO1646
SCO2792	SCO6310
SCO0608	SCO7613
SCO6265	SCO5588
SCO0204	SCO0169
SCO2950	SCO1638
SCO4180	SCO1760
SCO4907	SCO2073
SCO3320	SCO5628
SCO2792	SCO3843
SCO3320	SCO1930
SCO4180	SCO2039
SCO5570	SCO5706
SCO5260	SCO6010
SCO3202	SCO3958
SCO0194	SCO0195
SCO5260	SCO2010
SCO3571	SCO4041
SCO5085	SCO6422
SCO1489	SCO1772
SCO2140	SCO4550
SCO5570	SCO5360
SCO4159	SCO5541
SCO4180	SCO2115
SCO3549	SCO4131
SCO3579	SCO7246
SCO3859	SCO3854
SCO3198	SCO7460
SCO3356	SCO3358
SCO3320	SCO4687
SCO4180	SCO2054
SCO5570	SCO4635
SCO3323	SCO6794
SCO5570	SCO4661
SCO2950	SCO3576
SCO1489	SCO2303
SCO2950	SCO3877
SCO5570	SCO5868
SCO2950	SCO2088
SCO2792	SCO2904
SCO5570	SCO4652
SCO3202	SCO1543
SCO3571	SCO3649
SCO3571	SCO4179
SCO3571	SCO5500
SCO5877	SCO5085
SCO2950	SCO4614
SCO7341	SCO0488
SCO3320	SCO2879
SCO3571	SCO3565
SCO5405	SCO0222
SCO4394	SCO4577
SCO0204	SCO0179
SCO5723	SCO4281
SCO5085	SCO0401
SCO3063	SCO3974
SCO3320	SCO5546
SCO3571	SCO4296
SCO4180	SCO5711
SCO2950	SCO2087
SCO3571	SCO4328
SCO2140	SCO5426
SCO5405	SCO1936
SCO3549	SCO6128
SCO3859	SCO2018
SCO5820	SCO2001
SCO2792	SCO1676
SCO2140	SCO3619
SCO2792	SCO3543
SCO2950	SCO4013
SCO4180	SCO4824
SCO5570	SCO2971
SCO3571	SCO5405
SCO4907	SCO3060
SCO5570	SCO4704
SCO2935	SCO6065
SCO0204	SCO4827
SCO4180	SCO1934
SCO1576	SCO6109
SCO3571	SCO2912
SCO0608	SCO1753
SCO4180	SCO3678
SCO2792	SCO3420
SCO1480	SCO1943
SCO3571	SCO4824
SCO3320	SCO1254
SCO3320	SCO3345
SCO3320	SCO6225
SCO3323	SCO4675
SCO3579	SCO4409
SCO3356	SCO3357
SCO2950	SCO3301
SCO2950	SCO3124
SCO0204	SCO0209
SCO3571	SCO3068
SCO4180	SCO4556
SCO2792	SCO3903
SCO4180	SCO3794
SCO5570	SCO1922
SCO5570	SCO2504
SCO2140	SCO5873
SCO4091	SCO2097
SCO2140	SCO5580
SCO2950	SCO2612
SCO3320	SCO4637
SCO4180	SCO6260
SCO4180	SCO6124
SCO5085	SCO0387
SCO5570	SCO5501
SCO5570	SCO0247
SCO3063	SCO6493
SCO5820	SCO2102
SCO3323	SCO1800
SCO1489	SCO1771
SCO5570	SCO4721
SCO5216	SCO5042
SCO3549	SCO2514
SCO2792	SCO5650
SCO3859	SCO3345
SCO5570	SCO4637
SCO5260	SCO6011
SCO5570	SCO4706
SCO3320	SCO3068
SCO4907	SCO5707
SCO1678	SCO4497
SCO2792	SCO2093
SCO3859	SCO4403
SCO4180	SCO3068
SCO2792	SCO1116
SCO2792	SCO2126
SCO5405	SCO1638
SCO4180	SCO4839
SCO3859	SCO2158
SCO5085	SCO5074
SCO3375	SCO2591
SCO5820	SCO5393
SCO3571	SCO1531
SCO5570	SCO5500
SCO3859	SCO2093
SCO3320	SCO5775
SCO4180	SCO5645
SCO5570	SCO4655
SCO5405	SCO5729
SCO5570	SCO3845
SCO5570	SCO4714
SCO4159	SCO3127
SCO3571	SCO5178
SCO1480	SCO4277
SCO5819	SCO5177
SCO0204	SCO2950
SCO5570	SCO5367
SCO5570	SCO4703
SCO3571	SCO7036
SCO3571	SCO5221
SCO4180	SCO3766
SCO5804	SCO4770
SCO3571	SCO4762
SCO4180	SCO3543
SCO5570	SCO5369
SCO4180	SCO5737
SCO2792	SCO3859
SCO5881	SCO4226
SCO0204	SCO3819
SCO3571	SCO2913
SCO3063	SCO2266
SCO4908	SCO3048
SCO5570	SCO3882
SCO4180	SCO3851
SCO5570	SCO4710
SCO4180	SCO2053
SCO1480	SCO5855
SCO5085	SCO4585
SCO5405	SCO5730
SCO5260	SCO5113
SCO5570	SCO3649
SCO5570	SCO4662
SCO4180	SCO3398
SCO4180	SCO3059
SCO5085	SCO5077
SCO5804	SCO6659
SCO4180	SCO5843
SCO2950	SCO5414
SCO5085	SCO0390
SCO2792	SCO2018
SCO2950	SCO6482
SCO3571	SCO3059
SCO1480	SCO2303
SCO2127	SCO5147
SCO0608	SCO0736
SCO2792	SCO1665
SCO5877	SCO2727
SCO3202	SCO6776
SCO4180	SCO7249
SCO3320	SCO5774
SCO2792	SCO2882
SCO4180	SCO5397
SCO1489	SCO3662
SCO2792	SCO3619
SCO5216	SCO3890
SCO1576	SCO5389
SCO4180	SCO2468
SCO5877	SCO2519
SCO5283	SCO1401
SCO4908	SCO3714
SCO5570	SCO4659
SCO2950	SCO3564
SCO1489	SCO2301
SCO5085	SCO0382
SCO2950	SCO7000
SCO3320	SCO1934
SCO7278	SCO3420
SCO3198	SCO5415
SCO5085	SCO0409
SCO2792	SCO1476
SCO4034	SCO3134
SCO3571	SCO1296
SCO4180	SCO6148
SCO2950	SCO2375
SCO3859	SCO1521
SCO5877	SCO0393
SCO4159	SCO5537
SCO4159	SCO4837
SCO4180	SCO4542
SCO4394	SCO0705
SCO4180	SCO4323
SCO5723	SCO6624
SCO4180	SCO4751
SCO5260	SCO6009
SCO3859	SCO2549
SCO2792	SCO2879
SCO3320	SCO5371
SCO3859	SCO3844
SCO1489	SCO5396
SCO3202	SCO4585
SCO5260	SCO5230
SCO3859	SCO5546
SCO5570	SCO6468
SCO3198	SCO7613
SCO2140	SCO1390
SCO5785	SCO5784
SCO2792	SCO2973
SCO3549	SCO2082
SCO7341	SCO5612
SCO3320	SCO1663
SCO3323	SCO5826
SCO5570	SCO4660
SCO4180	SCO1758
SCO5570	SCO4712
SCO3202	SCO2722
SCO2792	SCO2314
SCO3571	SCO2880
SCO5582	SCO0701
SCO4180	SCO1652
SCO5071	SCO5076
SCO3320	SCO4614
SCO1480	SCO3323
SCO4180	SCO5058
SCO5582	SCO0684
SCO4180	SCO2073
SCO5570	SCO3404
SCO4907	SCO3036
SCO4425	SCO4903
SCO5582	SCO5218
SCO3320	SCO5743
SCO4394	SCO2680
SCO5877	SCO5893
SCO2140	SCO1476
SCO5552	SCO3033
SCO4908	SCO1749
SCO5260	SCO2011
SCO2950	SCO1521
SCO5819	SCO5174
SCO5552	SCO2579
SCO5405	SCO4209
SCO2950	SCO3571
SCO4180	SCO1503
SCO3859	SCO4078
SCO4180	SCO2052
SCO3579	SCO1749
SCO4180	SCO3823
SCO4908	SCO3194
SCO1839	SCO7246
SCO5820	SCO4129
SCO4180	SCO4645
SCO4180	SCO1213
SCO5570	SCO5135
SCO0204	SCO4252
SCO3571	SCO2147
SCO3320	SCO5553
SCO2140	SCO4281
SCO5570	SCO3908
SCO2950	SCO4855
SCO7341	SCO7290
SCO2792	SCO4238
SCO3549	SCO4509
SCO2950	SCO1930
SCO1480	SCO0705
SCO4180	SCO5062
SCO3859	SCO4785
SCO3320	SCO5999
SCO5820	SCO2164
SCO5570	SCO5594
SCO5552	SCO1576
SCO4159	SCO1945
SCO3859	SCO2085
SCO5570	SCO5292
SCO1678	SCO4205
SCO5570	SCO5627
SCO3320	SCO5570
SCO3320	SCO2913
SCO4425	SCO0409
SCO1480	SCO5723
SCO3320	SCO2180
SCO3571	SCO2950
SCO4180	SCO2112
SCO3323	SCO5174
SCO4180	SCO5353
SCO0194	SCO0191
SCO3571	SCO2793
SCO1576	SCO6756
SCO3859	SCO5355
SCO2127	SCO5590
SCO5231	SCO7692
SCO3859	SCO4328
SCO5820	SCO5497
SCO2140	SCO2196
SCO5570	SCO2580
SCO5570	SCO3906
SCO5570	SCO3320
SCO1480	SCO5244
SCO4180	SCO3060
SCO5570	SCO5499
SCO3571	SCO3859
SCO3859	SCO5740
SCO5570	SCO4785
SCO3571	SCO3794
SCO5216	SCO3373
SCO3859	SCO4494
SCO3320	SCO5543
SCO0204	SCO0617
SCO5820	SCO4232
SCO7278	SCO1864
SCO4180	SCO4968
SCO3320	SCO1213
SCO5570	SCO2314
SCO5085	SCO6163
SCO3320	SCO1924
SCO2792	SCO6013
SCO5570	SCO5522
SCO3549	SCO1796
SCO3571	SCO4238
SCO5570	SCO3909
SCO4180	SCO2279
SCO2140	SCO1960
SCO2140	SCO4209
SCO5405	SCO2155
SCO3320	SCO1907
SCO3323	SCO4793
SCO2950	SCO2013
SCO1489	SCO5569
SCO5085	SCO7613
SCO4180	SCO4043
SCO2792	SCO3878
SCO4180	SCO4177
SCO3571	SCO5464
SCO3859	SCO3337
SCO5552	SCO3122
SCO5085	SCO2927
SCO3859	SCO4282
SCO5570	SCO5564
SCO5570	SCO5626
SCO4180	SCO5809
SCO6265	SCO3190
SCO3571	SCO5355
SCO5405	SCO3615
SCO5570	SCO3731
SCO5877	SCO6196
SCO3320	SCO1501
SCO5405	SCO5135
SCO4180	SCO3856
SCO4907	SCO5708
SCO0608	SCO4584
SCO3579	SCO5351
SCO4180	SCO2151
SCO5570	SCO4856
SCO3356	SCO3119
SCO2792	SCO5696
SCO2950	SCO5876
SCO5819	SCO5175
SCO5085	SCO3975
SCO5071	SCO5092
SCO3063	SCO5048
SCO2140	SCO2080
SCO5216	SCO4967
SCO3320	SCO5366
SCO3320	SCO4827
SCO1576	SCO6108
SCO3323	SCO4677
SCO5085	SCO6728
SCO5723	SCO4489
SCO4907	SCO4556
SCO3320	SCO1531
SCO3320	SCO3381
SCO4907	SCO2972
SCO2792	SCO5396
SCO3571	SCO2881
SCO3063	SCO7358
SCO3859	SCO3421
SCO5570	SCO5804
SCO3571	SCO7510
SCO4180	SCO5705
SCO5570	SCO4709
SCO5803	SCO2192
SCO0204	SCO0180
SCO4180	SCO2624
SCO3320	SCO2884
SCO4907	SCO1123
SCO2950	SCO3058
SCO3202	SCO5796
SCO5570	SCO4715
SCO5820	SCO3005
SCO2127	SCO0705
SCO2792	SCO3615
SCO3063	SCO5703
SCO4159	SCO2095
SCO5405	SCO6482
SCO5570	SCO4711
SCO5570	SCO2458
SCO3571	SCO5522
SCO4180	SCO4087
SCO4180	SCO4067
SCO2950	SCO1505
SCO3320	SCO2881
SCO3571	SCO3096
SCO2140	SCO2073
SCO2792	SCO5628
SCO5570	SCO6467
SCO2140	SCO4200
SCO5552	SCO2936
SCO2792	SCO2883
SCO2950	SCO5704
SCO3571	SCO2148
SCO2792	SCO7057
SCO5570	SCO1387
SCO4159	SCO2126
SCO2950	SCO6756
SCO0194	SCO0188
SCO5570	SCO1916
SCO2792	SCO3766
SCO3859	SCO4614
SCO5260	SCO6219
SCO5820	SCO5998
SCO3571	SCO1496
SCO5260	SCO4295
SCO5570	SCO3053
SCO4159	SCO6028
SCO1480	SCO2514
SCO2950	SCO5625
SCO0204	SCO0181
SCO7278	SCO2830
SCO5723	SCO6750
SCO4180	SCO2380
SCO5570	SCO2084
SCO5570	SCO4717
SCO5405	SCO1439
SCO3320	SCO4473
SCO1839	SCO3113
SCO4180	SCO3355
SCO3579	SCO1375
SCO1489	SCO5198
SCO1480	SCO3549
SCO5820	SCO5523
SCO3859	SCO2547
SCO3375	SCO6108
SCO5570	SCO5515
SCO2792	SCO5365
SCO4180	SCO2387
SCO3571	SCO3024
SCO4180	SCO3378
SCO3859	SCO5360
SCO3571	SCO5365
SCO3859	SCO5221
SCO3859	SCO2136
SCO2792	SCO4128
SCO4180	SCO5738
SCO1576	SCO0805
SCO4908	SCO4904
SCO3859	SCO0805
SCO2792	SCO0247
SCO3549	SCO3548
SCO4394	SCO0767
SCO3320	SCO3098
SCO4180	SCO1631
SCO3063	SCO3840
SCO3320	SCO1651
SCO2950	SCO4824
SCO5085	SCO6164
SCO3549	SCO2382
SCO1489	SCO3843
SCO3859	SCO3095
SCO2140	SCO2627
SCO5582	SCO2525
SCO3320	SCO4855
SCO4159	SCO2497
SCO3571	SCO3182
SCO4034	SCO1163
SCO2950	SCO4645
SCO4180	SCO2966
SCO2792	SCO6468
SCO0561	SCO0560
SCO4180	SCO3846
SCO5085	SCO0397
SCO4180	SCO4403
SCO0608	SCO4884
SCO1576	SCO5361
SCO3375	SCO3941
SCO3320	SCO6757
SCO3323	SCO3943
SCO5804	SCO1663
SCO3549	SCO1480
SCO3571	SCO5122
SCO1480	SCO5396
SCO4543	SCO3123
SCO3356	SCO7657
SCO4907	SCO2054
SCO2792	SCO4161
SCO2792	SCO1907
SCO3320	SCO4469
SCO4180	SCO2548
SCO4180	SCO2549
SCO3320	SCO2155
SCO2792	SCO2855
SCO1576	SCO1086
SCO1576	SCO6663
SCO0204	SCO6717
SCO2792	SCO3768
SCO2140	SCO6493
SCO3571	SCO2314
SCO3320	SCO4474
SCO4180	SCO3149
SCO5405	SCO1946
SCO3358	SCO3357
SCO2140	SCO1991
SCO2950	SCO3155
SCO5570	SCO3615
SCO3859	SCO3304
SCO7278	SCO2828
SCO4180	SCO2003
SCO4908	SCO3086
SCO5820	SCO6000
SCO5552	SCO5498
SCO4907	SCO2562
SCO2140	SCO4177
SCO5405	SCO0928
SCO4180	SCO0902
SCO1576	SCO1857
SCO3320	SCO4809
SCO2140	SCO2045
SCO4907	SCO5711
SCO3320	SCO1296
SCO4180	SCO4231
SCO3571	SCO1214
SCO3571	SCO7730
SCO7278	SCO7210
SCO5819	SCO4441
SCO3571	SCO3903
SCO2950	SCO4771
SCO5216	SCO1304
SCO3320	SCO1595
SCO5877	SCO5415
SCO3549	SCO2611
SCO6008	SCO2935
SCO2792	SCO5833
SCO3323	SCO1480
SCO3320	SCO0923
SCO3571	SCO5833
SCO1489	SCO0641
SCO3571	SCO4775
SCO0608	SCO5036
SCO4180	SCO5743
SCO2792	SCO4233
SCO5570	SCO4708
SCO3571	SCO0506
SCO3859	SCO3409
SCO5881	SCO5444
SCO3323	SCO4237
SCO3063	SCO7286
SCO1480	SCO2078
SCO5085	SCO4425
SCO2792	SCO4770
SCO3549	SCO2102
SCO5570	SCO1771
SCO0204	SCO4251
SCO5405	SCO3619
SCO3320	SCO5554
SCO4180	SCO2132
SCO5217	SCO2161
SCO4180	SCO5220
SCO4907	SCO3059
SCO4180	SCO3582
SCO5570	SCO3883
SCO5283	SCO2988
SCO5877	SCO4254
SCO5877	SCO0392
SCO2950	SCO4294
SCO1568	SCO4942
SCO3571	SCO2879
SCO5085	SCO0391
SCO6265	SCO6483
SCO4425	SCO1773
SCO5085	SCO1810
SCO2950	SCO5145
SCO5085	SCO4265
SCO3320	SCO2154
SCO4180	SCO4235
SCO5085	SCO1088
SCO0204	SCO0922
SCO3063	SCO4752
SCO3859	SCO2266
SCO2950	SCO5355
SCO3358	SCO3194
SCO5085	SCO5265
SCO3571	SCO4732
SCO2792	SCO1114
SCO2140	SCO6261
SCO5405	SCO2151
SCO3571	SCO3345
SCO1489	SCO3663
SCO5260	SCO2637
SCO4180	SCO7366
SCO4159	SCO2081
SCO2792	SCO5627
SCO3571	SCO2052
SCO3571	SCO2548
SCO2950	SCO0222
SCO4180	SCO2149
SCO2140	SCO4497
SCO5085	SCO6162
SCO5723	SCO3008
SCO3859	SCO6623
SCO1576	SCO3877
SCO5570	SCO5290
SCO5877	SCO0401
SCO5405	SCO2129
SCO1480	SCO4411
SCO3320	SCO6199
SCO4180	SCO4646
SCO4180	SCO3962
SCO4180	SCO1946
SCO5582	SCO2868
SCO3571	SCO3823
SCO3323	SCO1675
SCO4180	SCO3337
SCO5570	SCO4855
SCO3202	SCO3956
SCO3571	SCO1254
SCO4180	SCO3311
SCO5570	SCO2879
SCO3202	SCO7536
SCO5082	SCO1356
SCO5820	SCO4130
SCO5260	SCO3821
SCO5085	SCO1541
SCO4180	SCO3970
SCO3202	SCO4005
SCO5570	SCO1505
SCO2792	SCO6622
SCO2792	SCO1937
SCO5071	SCO5086
SCO4907	SCO1508
SCO3320	SCO5354
SCO5877	SCO0382
SCO3320	SCO5367
SCO3320	SCO1921
SCO3198	SCO4011
SCO5260	SCO6591
SCO2140	SCO0730
SCO5877	SCO0384
SCO4180	SCO4825
SCO1480	SCO0703
SCO3198	SCO1541
SCO5570	SCO1947
SCO3549	SCO3618
SCO4159	SCO2094
SCO2950	SCO3678
SCO3375	SCO2505
SCO4180	SCO4236
SCO5570	SCO1213
SCO4180	SCO1488
SCO4425	SCO0391
SCO3320	SCO2181
SCO5570	SCO5366
SCO2950	SCO2086
SCO3375	SCO1691
SCO5216	SCO3889
SCO2792	SCO1771
SCO3356	SCO3870
SCO5570	SCO5289
SCO3320	SCO2084
SCO2950	SCO4472
SCO3668	SCO3136
SCO5723	SCO1672
SCO3859	SCO1517
SCO4180	SCO6013
SCO4180	SCO4919
SCO5804	SCO6662
SCO4907	SCO5699
SCO0608	SCO3958
SCO5582	SCO4114
SCO3571	SCO4662
SCO2792	SCO1935
SCO3202	SCO3390
SCO5820	SCO5598
SCO2950	SCO5547
SCO4180	SCO5365
SCO1489	SCO3846
SCO4228	SCO4144
SCO4180	SCO6312
SCO2792	SCO2369
SCO3320	SCO4825
SCO1576	SCO5355
SCO3063	SCO4777
SCO5085	SCO2322
SCO3320	SCO5869
SCO5216	SCO2161
SCO3571	SCO1663
SCO5405	SCO0527
SCO4180	SCO2093
SCO1576	SCO1597
SCO1576	SCO5366
SCO5570	SCO3098
SCO5085	SCO4791
SCO5405	SCO4259
SCO5881	SCO6950
SCO5570	SCO5900
SCO3320	SCO2089
SCO0608	SCO4572
SCO5570	SCO3411
SCO1576	SCO5976
SCO4180	SCO6071
SCO5820	SCO2607
SCO3571	SCO5289
SCO4180	SCO1829
SCO2792	SCO4179
SCO5216	SCO6551
SCO5582	SCO5150
SCO5804	SCO1924
SCO2950	SCO4966
SCO0204	SCO5777
SCO3320	SCO3878
SCO3571	SCO2904
SCO3202	SCO1375
SCO2140	SCO3036
SCO5804	SCO3882
SCO2792	SCO6493
SCO4907	SCO5812
SCO3549	SCO1633
SCO3571	SCO5388
SCO1576	SCO1490
SCO4907	SCO2052
SCO5071	SCO2519
SCO5877	SCO5892
SCO6265	SCO4036
SCO6520	SCO6685
SCO5582	SCO5243
SCO4180	SCO5491
SCO5071	SCO5082
SCO0204	SCO0616
SCO4180	SCO2154
SCO5570	SCO2389
SCO5570	SCO6097
SCO5217	SCO0788
SCO4180	SCO2038
SCO3375	SCO6197
SCO3859	SCO2086
SCO3375	SCO7404
SCO5820	SCO2836
SCO1489	SCO5495
SCO4180	SCO5859
SCO7341	SCO6833
SCO2386	SCO1477
SCO3549	SCO5170
SCO3859	SCO5111
SCO3571	SCO3650
SCO5570	SCO2116
SCO3571	SCO2620
SCO2935	SCO5599
SCO5552	SCO5512
SCO4180	SCO2150
SCO1489	SCO4812
SCO2792	SCO2610
SCO5819	SCO4545
SCO2792	SCO5838
SCO4091	SCO3008
SCO4180	SCO2034
SCO2950	SCO2620
SCO7278	SCO2829
SCO3320	SCO3421
SCO2140	SCO2105
SCO2792	SCO7516
SCO5552	SCO4813
SCO3320	SCO4366
SCO5582	SCO2079
SCO4180	SCO1798
SCO3320	SCO2148
SCO5552	SCO2788
SCO2140	SCO1123
SCO5552	SCO2088
SCO0204	SCO2904
SCO3320	SCO4231
SCO1489	SCO4722
SCO0608	SCO4924
SCO4180	SCO2974
SCO3549	SCO3420
SCO1480	SCO4920
SCO3356	SCO7342
SCO1576	SCO1514
SCO4180	SCO5267
SCO4180	SCO1960
SCO1576	SCO2287
SCO5570	SCO0622
SCO2935	SCO6008
SCO3571	SCO4233
SCO4180	SCO1311
SCO5085	SCO1426
SCO3129	SCO5143
SCO5405	SCO2053
SCO2792	SCO2881
SCO5570	SCO1655
SCO3859	SCO4647
SCO3859	SCO3878
SCO3571	SCO0246
SCO5570	SCO3854
SCO5570	SCO2571
SCO3356	SCO4263
SCO1480	SCO6157
SCO4180	SCO2640
SCO3202	SCO1421
SCO3859	SCO6948
SCO5552	SCO3098
SCO4091	SCO5507
SCO2140	SCO2034
SCO4180	SCO2125
SCO5351	SCO0673
SCO2792	SCO3873
SCO6265	SCO3881
SCO5085	SCO2287
SCO3571	SCO5624
SCO0561	SCO5004
SCO4180	SCO5721
SCO1950	SCO2600
SCO7278	SCO1867
SCO4180	SCO2156
SCO5552	SCO1495
SCO2127	SCO2368
SCO5351	SCO7253
SCO3571	SCO5743
SCO3859	SCO3184
SCO5351	SCO4408
SCO4180	SCO1496
SCO3571	SCO4403
SCO5820	SCO2064
SCO3579	SCO1241
SCO3356	SCO2999
SCO5085	SCO4584
SCO0608	SCO5660
SCO3859	SCO1765
SCO5820	SCO4722
SCO5582	SCO0685
SCO1480	SCO1489
SCO5552	SCO3895
SCO3571	SCO0623
SCO3320	SCO1923
SCO5723	SCO4394
SCO2950	SCO5440
SCO2950	SCO3659
SCO4159	SCO5397
SCO5552	SCO6754
SCO2950	SCO4137
SCO2935	SCO6062
SCO3375	SCO1766
SCO3320	SCO6753
SCO5260	SCO5114
SCO5085	SCO5502
SCO3375	SCO1563
SCO5405	SCO1945
SCO2792	SCO1296
SCO4180	SCO2155
SCO1489	SCO5998
SCO5877	SCO3236
SCO3859	SCO1798
SCO5570	SCO2969
SCO3323	SCO5148
SCO7341	SCO0602
SCO6280	SCO6279
SCO4180	SCO6125
SCO3320	SCO2149
SCO5820	SCO4654
SCO3320	SCO3945
SCO1576	SCO3024
SCO4907	SCO2941
SCO0608	SCO1749
SCO5820	SCO2838
SCO3571	SCO3615
SCO4180	SCO2600
SCO3198	SCO5683
SCO1489	SCO6762
SCO3323	SCO0931
SCO4180	SCO5731
SCO7278	SCO2831
SCO1489	SCO5537
SCO1480	SCO4232
SCO4180	SCO5500
SCO4907	SCO1438
SCO3320	SCO2136
SCO5570	SCO5745
SCO5570	SCO5111
SCO4180	SCO3968
SCO2792	SCO2549
SCO3063	SCO2129
SCO5552	SCO5529
SCO3198	SCO2516
SCO2950	SCO3187
SCO4180	SCO5736
SCO3859	SCO1510
SCO3358	SCO2836
SCO1489	SCO1480
SCO4180	SCO4233
SCO5804	SCO3421
SCO7341	SCO5438
SCO4907	SCO6312
SCO3571	SCO5625
SCO7341	SCO6386
SCO6265	SCO1767
SCO7341	SCO6232
SCO0599	SCO6759
SCO3063	SCO0804
SCO2950	SCO4732
SCO4180	SCO2126
SCO5570	SCO5359
SCO3579	SCO7253
SCO1576	SCO1762
SCO2950	SCO4474
SCO2140	SCO1439
SCO0204	SCO0170
SCO5552	SCO1214
SCO3202	SCO1088
SCO4180	SCO4858
SCO3859	SCO2019
SCO3202	SCO3957
SCO3202	SCO1648
SCO4425	SCO4187
SCO5085	SCO3343
SCO4180	SCO7022
SCO5820	SCO2608
SCO4180	SCO5352
SCO5260	SCO2831
SCO1489	SCO4128
SCO2950	SCO3190
SCO3320	SCO0246
SCO4180	SCO1409
SCO2792	SCO2440
SCO3320	SCO5545
SCO2950	SCO5464
SCO1678	SCO5503
SCO2950	SCO4720
SCO6265	SCO5777
SCO2792	SCO1479
SCO5552	SCO2043
SCO5570	SCO3859
SCO4180	SCO3882
SCO5405	SCO3095
SCO5570	SCO4857
SCO5260	SCO2830
SCO5570	SCO1473
SCO3323	SCO0685
SCO2792	SCO0846
SCO4907	SCO1768
SCO3859	SCO2458
SCO4180	SCO2577
SCO5216	SCO5769
SCO5820	SCO6637
SCO4180	SCO3852
SCO5216	SCO4181
SCO5405	SCO4180
SCO6265	SCO3375
SCO5570	SCO3187
SCO1678	SCO4387
SCO3320	SCO3795
SCO5552	SCO1514
SCO4180	SCO5708
SCO3320	SCO2151
SCO2950	SCO4809
SCO1489	SCO2617
SCO5881	SCO4872
SCO5231	SCO2074
SCO5804	SCO6661
SCO5552	SCO0222
SCO4091	SCO2078
SCO4180	SCO4808
SCO3320	SCO1922
SCO5723	SCO1480
SCO3571	SCO2612
SCO3571	SCO4165
SCO3323	SCO4772
SCO4159	SCO1937
SCO5085	SCO5957
SCO2792	SCO4282
SCO4180	SCO1775
SCO5723	SCO2947
SCO2792	SCO5178
SCO3202	SCO3940
SCO3549	SCO2235
SCO4180	SCO4490
SCO5552	SCO4470
SCO5552	SCO1490
SCO3571	SCO4078
SCO5216	SCO1997
SCO5405	SCO0929
SCO3571	SCO1212
SCO3375	SCO2395
SCO5570	SCO1934
SCO5820	SCO2525
SCO3063	SCO5560
SCO3063	SCO6341
SCO5405	SCO6627
SCO5570	SCO5546
SCO1839	SCO5466
SCO5405	SCO1935
SCO1480	SCO6637
SCO3859	SCO5289
SCO4180	SCO5730
SCO3063	SCO5212
SCO6265	SCO0277
SCO5804	SCO5356
SCO3571	SCO4472
SCO3549	SCO4091
SCO5405	SCO3062
SCO7278	SCO7325
SCO0204	SCO6531
SCO4159	SCO1907
SCO2792	SCO4559
SCO0608	SCO1543
SCO5819	SCO6323
SCO4394	SCO5590
SCO0204	SCO4253
SCO7341	SCO0333
SCO4394	SCO4017
SCO5804	SCO6551
SCO7341	SCO2834
SCO2120	SCO5475
SCO3063	SCO0506
SCO3549	SCO7820
SCO5582	SCO2523
SCO3571	SCO2150
SCO3859	SCO4724
SCO4180	SCO4750
SCO3202	SCO0973
SCO4034	SCO0685
SCO5085	SCO4165
SCO4184	SCO5390
SCO6008	SCO3563
SCO5405	SCO1591
SCO4180	SCO5971
SCO5820	SCO5386
SCO2950	SCO3792
SCO7341	SCO6329
SCO5819	SCO6157
SCO5820	SCO2435
SCO4180	SCO2148
SCO5570	SCO3543
SCO3217	SCO3236
SCO6265	SCO4732
SCO3859	SCO2037
SCO4180	SCO4178
SCO1576	SCO2013
SCO5570	SCO1521
SCO4180	SCO1937
SCO1576	SCO1569
SCO2792	SCO5293
SCO6265	SCO0231
SCO2792	SCO5694
SCO1576	SCO2612
SCO2140	SCO2103
SCO5820	SCO5196
SCO5820	SCO2667
SCO3859	SCO2562
SCO5403	SCO6910
SCO3571	SCO1116
SCO0204	SCO5775
SCO5260	SCO1198
SCO2792	SCO6627
SCO5260	SCO2591
SCO4908	SCO4613
SCO5085	SCO3110
SCO5243	SCO7251
SCO2140	SCO2038
SCO4180	SCO2225
SCO5085	SCO5380
SCO3571	SCO2125
SCO2140	SCO5549
SCO2950	SCO2579
SCO4180	SCO3346
SCO2950	SCO3344
SCO1576	SCO5498
SCO4180	SCO5740
SCO2792	SCO1502
SCO5877	SCO5484
SCO3859	SCO2643
SCO4180	SCO3649
SCO3571	SCO4721
SCO3571	SCO4761
SCO3571	SCO7220
SCO3571	SCO4180
SCO3571	SCO3820
SCO5804	SCO1921
SCO1576	SCO5513
SCO4180	SCO2388
SCO3549	SCO2368
SCO3579	SCO3134
SCO4091	SCO1633
SCO5570	SCO2149
SCO3571	SCO3184
SCO6265	SCO4037
SCO5085	SCO6993
SCO1839	SCO3288
SCO2935	SCO5857
SCO3202	SCO3111
SCO7341	SCO7077
SCO1480	SCO5582
SCO3375	SCO6606
SCO5570	SCO1490
SCO5405	SCO1921
SCO2120	SCO1676
SCO7278	SCO1866
SCO4180	SCO3768
SCO5570	SCO5545
SCO2792	SCO5999
SCO3579	SCO1550
SCO1489	SCO2580
SCO4180	SCO5707
SCO5405	SCO3961
SCO1576	SCO1814
SCO3571	SCO2037
SCO1480	SCO4854
SCO5405	SCO1495
SCO5085	SCO0220
SCO5085	SCO6424
SCO1576	SCO6754
SCO2127	SCO4610
SCO7341	SCO6924
SCO4180	SCO1424
SCO1568	SCO7047
SCO5351	SCO4442
SCO2140	SCO6960
SCO5570	SCO3409
SCO3320	SCO1840
SCO1576	SCO5290
SCO4180	SCO4245
SCO3571	SCO6753
SCO5552	SCO2682
SCO3571	SCO6622
SCO3375	SCO0741
SCO2792	SCO6098
SCO5217	SCO4205
SCO4180	SCO2576
SCO4180	SCO5501
SCO7341	SCO2422
SCO4180	SCO1476
SCO5552	SCO6756
SCO4180	SCO5787
SCO4907	SCO7286
SCO5405	SCO4233
SCO3571	SCO3767
SCO5552	SCO5542
SCO4180	SCO4494
SCO3549	SCO4300
SCO3571	SCO5425
SCO2792	SCO2225
SCO3571	SCO4814
SCO4908	SCO4226
SCO4180	SCO2147
SCO3549	SCO2236
SCO3323	SCO5218
SCO3579	SCO1645
SCO4180	SCO4540
SCO3375	SCO4043
SCO3571	SCO3190
SCO1480	SCO1772
SCO3859	SCO2879
SCO2140	SCO4750
SCO5351	SCO3579
SCO3375	SCO2548
SCO0599	SCO2095
SCO5570	SCO5542
SCO3202	SCO0797
SCO4180	SCO2180
SCO2792	SCO0929
SCO2950	SCO2904
SCO5804	SCO1923
SCO3063	SCO3582
SCO5405	SCO2915
SCO5570	SCO5512
SCO3202	SCO6091
SCO5260	SCO4431
SCO3571	SCO6468
SCO3549	SCO2619
SCO3571	SCO1540
SCO3859	SCO2792
SCO0608	SCO1375
SCO1576	SCO1655
SCO2950	SCO4721
SCO2792	SCO3767
SCO5085	SCO0321
SCO6685	SCO6520
SCO6520	SCO3806
SCO5570	SCO1116
SCO2792	SCO6097
SCO3571	SCO3909
SCO5085	SCO5683
SCO4180	SCO5739
SCO7278	SCO1865
SCO3571	SCO5290
SCO2127	SCO1643
SCO3063	SCO3398
SCO5082	SCO5071
SCO3063	SCO5699
SCO3571	SCO3792
SCO3375	SCO3632
SCO5405	SCO3155
SCO5405	SCO6948
SCO3320	SCO5776
SCO5085	SCO3328
SCO1489	SCO4282
SCO1576	SCO3564
SCO5723	SCO5123
SCO5570	SCO2154
SCO3571	SCO4855
SCO4180	SCO6042
SCO4034	SCO0682
SCO3859	SCO5544
SCO0204	SCO6569
SCO2950	SCO7576
SCO5085	SCO0392
SCO4180	SCO4492
SCO3859	SCO3420
SCO3571	SCO3962
SCO3320	SCO2951
SCO5552	SCO3383
SCO4907	SCO4178
SCO1489	SCO1384
SCO2792	SCO6101
SCO5570	SCO0681
SCO3571	SCO2129
SCO3571	SCO6531
SCO3571	SCO5546
SCO2140	SCO1205
SCO5820	SCO2611
SCO5552	SCO4928
SCO3571	SCO5838
SCO5804	SCO1926
SCO0204	SCO4242
SCO3549	SCO1965
SCO2140	SCO4260
SCO5820	SCO5480
SCO5723	SCO2079
SCO2792	SCO3375
SCO2386	SCO1780
SCO5819	SCO4239
SCO2140	SCO2942
SCO4180	SCO3542
SCO3571	SCO2087
SCO3202	SCO1753
SCO5877	SCO0387
SCO3859	SCO1776
SCO2950	SCO1546
SCO4159	SCO2300
SCO5552	SCO1255
SCO3356	SCO0162
SCO3323	SCO5396
SCO7278	SCO3928
SCO7341	SCO5620
SCO5820	SCO5204
SCO4180	SCO6960
SCO4180	SCO5704
SCO5570	SCO5354
SCO2792	SCO3096
SCO3571	SCO5135
SCO3320	SCO2116
SCO3859	SCO5513
SCO4180	SCO7286
SCO3202	SCO1529
SCO3571	SCO4239
SCO4907	SCO2539
SCO3571	SCO4162
SCO2792	SCO6099
SCO3198	SCO1725
SCO2140	SCO3191
SCO2950	SCO4041
SCO5552	SCO0245
SCO3571	SCO3576
SCO2950	SCO6975
SCO5820	SCO1384
SCO5216	SCO2194
SCO3320	SCO2910
SCO5570	SCO4687
SCO5085	SCO0394
SCO6265	SCO0922
SCO2140	SCO2671
SCO5819	SCO5176
SCO3859	SCO5388
SCO3320	SCO5111
SCO2120	SCO7443
SCO5085	SCO0384
SCO4180	SCO1495
SCO3320	SCO4794
SCO2140	SCO2600
SCO2792	SCO1936
SCO5877	SCO2518
SCO2950	SCO3123
SCO3571	SCO0622
SCO4159	SCO2878
SCO2792	SCO4126
SCO4180	SCO3030
SCO2386	SCO4173
SCO5552	SCO4785
SCO5570	SCO2087
SCO7278	SCO6638
SCO4907	SCO2179
SCO5570	SCO2390
SCO3320	SCO2592
SCO7314	SCO6502
SCO3571	SCO1494
SCO5552	SCO3877
SCO3063	SCO5721
SCO5085	SCO2321
SCO5582	SCO1571
SCO3571	SCO3678
SCO4184	SCO6962
SCO5243	SCO4678
SCO3859	SCO2911
SCO2792	SCO3846
SCO4091	SCO1943
SCO3320	SCO6755
SCO1576	SCO5282
SCO1489	SCO1721
SCO4091	SCO1821
SCO3320	SCO4490
SCO5216	SCO2634
SCO3375	SCO6265
SCO2792	SCO3027
SCO3571	SCO1479
SCO0608	SCO0381
SCO2140	SCO7249
SCO3571	SCO1510
SCO5570	SCO3345
SCO3668	SCO1919
SCO5570	SCO2148
SCO5570	SCO1510
SCO3859	SCO5703
SCO5570	SCO3844
SCO3375	SCO4468
SCO5351	SCO6630
SCO4228	SCO4979
SCO5283	SCO1490
SCO5403	SCO0098
SCO2140	SCO2054
SCO5820	SCO1965
SCO4394	SCO2077
SCO3217	SCO4145
SCO0608	SCO3956
SCO7341	SCO6546
SCO3549	SCO3257
SCO5570	SCO5741
SCO5085	SCO4011
SCO5243	SCO1262
SCO5804	SCO5178
SCO3571	SCO4293
SCO3320	SCO2087
SCO4180	SCO1406
SCO2792	SCO2974
SCO4180	SCO0525
SCO3859	SCO5822
SCO3320	SCO3096
SCO2950	SCO5443
SCO4159	SCO2613
SCO2792	SCO4164
SCO2140	SCO4436
SCO1576	SCO5291
SCO2792	SCO4277
SCO3320	SCO1655
SCO3859	SCO0622
SCO4394	SCO6448
SCO2792	SCO2439
SCO3320	SCO3615
SCO4394	SCO2127
SCO4180	SCO5991
SCO2792	SCO2094
SCO5820	SCO4826
SCO0608	SCO6728
SCO1839	SCO1640
SCO1658	SCO1661
SCO5582	SCO3406
SCO3320	SCO2076
SCO3320	SCO5777
SCO3320	SCO5370
SCO1480	SCO0943
SCO5552	SCO3345
SCO3859	SCO2147
SCO2140	SCO2539
SCO3202	SCO3959
SCO5820	SCO1639
SCO5877	SCO0395
SCO3202	SCO2668
SCO5582	SCO4676
SCO5405	SCO1438
SCO3320	SCO4813
SCO0608	SCO3328
SCO5819	SCO4080
SCO5570	SCO1907
SCO1576	SCO1494
SCO4180	SCO4387
SCO1480	SCO0701
SCO4180	SCO4086
SCO2140	SCO3400
SCO4907	SCO2533
SCO4180	SCO3565
SCO2792	SCO5198
SCO2508	SCO2419
SCO5570	SCO3421
SCO3202	SCO4584
SCO5217	SCO1960
SCO4908	SCO4005
SCO1489	SCO2103
SCO4180	SCO2212
SCO2792	SCO6359
SCO1678	SCO4087
SCO3571	SCO2089
SCO3323	SCO1241
SCO5570	SCO4366
SCO5405	SCO5646
SCO3571	SCO3854
SCO3356	SCO3194
SCO3571	SCO6755
SCO5877	SCO0922
SCO5877	SCO5442
SCO5723	SCO2172
SCO3571	SCO2019
SCO4180	SCO2613
SCO2792	SCO3320
SCO3202	SCO1089
SCO5405	SCO1947
SCO3320	SCO2156
SCO1576	SCO2138
SCO3571	SCO1501
SCO5085	SCO0924
SCO2127	SCO4609
SCO2950	SCO1921
SCO5405	SCO2951
SCO2950	SCO3922
SCO1576	SCO4111
SCO5085	SCO5880
SCO4180	SCO4745
SCO5778	SCO5260
SCO2950	SCO1254
SCO3571	SCO3873
SCO2140	SCO1210
SCO2950	SCO5048
SCO4180	SCO2648
SCO1489	SCO5538
SCO3063	SCO0108
SCO4180	SCO2045
SCO5231	SCO6924
SCO4180	SCO6341
SCO3063	SCO5350
SCO7341	SCO0007
SCO1480	SCO3768
SCO5570	SCO5650
SCO1489	SCO2064
SCO2792	SCO5275
SCO3549	SCO1021
SCO3549	SCO0785
SCO3571	SCO5876
SCO2792	SCO5569
SCO2950	SCO3098
SCO3063	SCO3651
SCO5552	SCO2037
SCO3358	SCO2671
SCO3320	SCO3823
SCO4425	SCO0381
SCO4180	SCO2103
SCO4907	SCO1530
SCO3320	SCO4857
SCO3859	SCO5696
SCO1576	SCO1608
SCO2792	SCO7655
SCO2964	SCO6611
SCO3549	SCO5855
SCO4180	SCO3651
SCO1576	SCO3876
SCO1576	SCO1254
SCO2950	SCO0482
SCO4543	SCO1374
SCO5085	SCO6196
SCO5820	SCO5717
SCO2950	SCO5564
SCO4907	SCO4235
SCO2950	SCO0623
SCO2127	SCO1644
SCO2950	SCO1531
SCO4180	SCO5569
SCO2950	SCO4352
SCO1839	SCO1749
SCO2950	SCO3909
SCO4425	SCO0392
SCO3320	SCO2051
SCO3323	SCO4349
SCO5820	SCO5607
SCO2792	SCO3856
SCO1576	SCO2037
SCO3063	SCO3575
SCO4180	SCO2547
SCO5243	SCO4408
SCO5552	SCO3380
SCO2792	SCO2103
SCO3859	SCO7286
SCO4180	SCO6339
SCO6265	SCO6758
SCO4180	SCO5709
SCO4908	SCO2663
SCO2140	SCO2963
SCO5582	SCO2097
SCO3320	SCO5373
SCO2950	SCO3300
SCO0561	SCO5275
SCO5570	SCO5514
SCO1489	SCO0247
SCO3859	SCO4294
SCO5260	SCO6198
SCO3859	SCO3901
SCO2950	SCO6225
SCO4425	SCO3924
SCO5723	SCO4177
SCO5582	SCO1507
SCO2964	SCO6232
SCO5820	SCO0990
SCO5085	SCO0055
SCO5820	SCO5476
SCO2792	SCO5058
SCO5804	SCO5696
SCO3571	SCO0805
SCO4180	SCO5048
SCO1576	SCO5061
SCO4394	SCO4411
SCO3549	SCO4277
SCO3375	SCO4509
SCO1480	SCO6323
SCO0204	SCO4244
SCO1480	SCO1478
SCO2950	SCO5388
SCO1489	SCO1478
SCO3571	SCO6339
SCO3571	SCO2076
SCO5570	SCO1776
SCO4180	SCO2084
SCO1839	SCO0682
SCO0600	SCO6501
SCO6265	SCO5776
SCO4180	SCO4397
SCO4180	SCO5628
SCO5552	SCO3300
SCO5405	SCO1503
SCO5552	SCO1761
SCO6520	SCO1247
SCO3198	SCO4225
SCO5570	SCO6757
SCO5552	SCO5212
SCO2792	SCO1759
SCO6265	SCO5261
SCO3320	SCO5290
SCO4180	SCO3619
SCO5570	SCO1760
SCO7341	SCO7650
SCO5405	SCO5558
SCO2950	SCO4296
SCO3320	SCO6339
SCO5085	SCO4293
SCO3859	SCO2971
SCO5260	SCO5116
SCO3859	SCO1762
SCO3320	SCO5136
SCO5804	SCO4990
SCO5283	SCO1591
SCO5552	SCO5361
SCO4180	SCO4907
SCO3571	SCO2618
SCO1576	SCO3901
SCO5570	SCO3795
SCO4184	SCO5789
SCO3859	SCO2138
SCO3320	SCO4785
SCO3859	SCO4524
SCO3571	SCO6109
SCO3202	SCO3286
SCO3859	SCO1473
SCO3571	SCO2357
SCO6008	SCO5229
SCO5582	SCO2621
SCO3202	SCO5759
SCO5405	SCO3096
SCO1576	SCO3058
SCO3375	SCO3024
SCO6265	SCO2682
SCO2140	SCO5723
SCO3859	SCO2555
SCO3320	SCO5730
SCO5570	SCO5740
SCO0608	SCO0382
SCO5351	SCO5511
SCO5570	SCO5573
SCO5582	SCO2302
SCO6280	SCO6277
SCO7341	SCO6845
SCO2950	SCO4827
SCO2140	SCO5189
SCO5260	SCO2012
SCO4180	SCO5289
SCO4180	SCO3546
SCO5804	SCO4837
SCO5405	SCO5718
SCO5217	SCO1721
SCO2140	SCO4839
SCO2792	SCO3614
SCO5085	SCO0381
SCO3571	SCO1570
SCO5570	SCO1531
SCO5804	SCO2883
SCO2950	SCO2677
SCO4180	SCO4550
SCO3571	SCO1921
SCO5405	SCO2180
SCO5085	SCO0388
[truncated: 21,909 more rows]

## Sheet: Inferred_BS-Exp
TF	TG
SCO0204	SCO6041
SCO0204	SCO0208
SCO5085	SCO5071
SCO0204	SCO0200
SCO0204	SCO0215
SCO3668	SCO3670
SCO0204	SCO0201
SCO0204	SCO0207
SCO3668	SCO3669
SCO0204	SCO0210
SCO0204	SCO0174
SCO0194	SCO0186
SCO0204	SCO0168
SCO0204	SCO0167
SCO0204	SCO4689
SCO0204	SCO0177
SCO5082	SCO5083
SCO0204	SCO0213
SCO5082	SCO5084
SCO0204	SCO0179
SCO0204	SCO0214
SCO0194	SCO0191
SCO0561	SCO0560
SCO5085	SCO6164
SCO0204	SCO0216
SCO0204	SCO4827
SCO3356	SCO6722
SCO1489	SCO2792
SCO5085	SCO4584
SCO3356	SCO3194
SCO0204	SCO0209
SCO0204	SCO0197
SCO0204	SCO3819
SCO2792	SCO2093
SCO2792	SCO5876
SCO3356	SCO3119
SCO2792	SCO3096
SCO5216	SCO5042
SCO2792	SCO3615
SCO0204	SCO2162
SCO5216	SCO5769
SCO1489	SCO2082
SCO2792	SCO6622
SCO5085	SCO4791
SCO0204	SCO2904
SCO5085	SCO5877
SCO5085	SCO1426
SCO0204	SCO4296
SCO4230	SCO4229
SCO3063	SCO4238
SCO5085	SCO0216
SCO3356	SCO1659
SCO0204	SCO6482
SCO5217	SCO5216
SCO0204	SCO6717
SCO3323	SCO4768
SCO2935	SCO2914
SCO5085	SCO5885
SCO3320	SCO5281
SCO0204	SCO2882
SCO4180	SCO1601
SCO3356	SCO3358
SCO3323	SCO5390
SCO0204	SCO0181
SCO0204	SCO3858
SCO4180	SCO2951
SCO4180	SCO1808
SCO3320	SCO5366
SCO4596	SCO1551
SCO0204	SCO3576
SCO3356	SCO5036
SCO3320	SCO1531
SCO5260	SCO3821
SCO1480	SCO0703
SCO2792	SCO2917
SCO4180	SCO2974
SCO4180	SCO1496
SCO5085	SCO5461
SCO0204	SCO5047
SCO3356	SCO4904
SCO0204	SCO6164
SCO5085	SCO3152
SCO1489	SCO5855
SCO3320	SCO2116
SCO3356	SCO7658
SCO3320	SCO4813
SCO5216	SCO3324
SCO2792	SCO5275
SCO2792	SCO2624
SCO0600	SCO7325
SCO2792	SCO3968
SCO3320	SCO5626
SCO3356	SCO5605
SCO3063	SCO3799
SCO0204	SCO0924
SCO3320	SCO3564
SCO2792	SCO5726
SCO3320	SCO2115
SCO4180	SCO1665
SCO5243	SCO4114
SCO2792	SCO3026
SCO3356	SCO0165
SCO4230	SCO4142
SCO3320	SCO2788
SCO6265	SCO3320
SCO0204	SCO5743
SCO2792	SCO4776
SCO0194	SCO5356
SCO3356	SCO4184
SCO4907	SCO2640
SCO0204	SCO2180
SCO3323	SCO6798
SCO5085	SCO4903
SCO5820	SCO4131
SCO0599	SCO0990
SCO1480	SCO3568
SCO5085	SCO3050
SCO3320	SCO5514
SCO5085	SCO0720
SCO5216	SCO4633
SCO4180	SCO4260
SCO2792	SCO7164
SCO2792	SCO1657
SCO5085	SCO5072
SCO5085	SCO5087
SCO5085	SCO6752
SCO0204	SCO4761
SCO0204	SCO4614
SCO3320	SCO1937
SCO3063	SCO2212
SCO4180	SCO2042
SCO3291	SCO5768
SCO5260	SCO6044
SCO5216	SCO3765
SCO3356	SCO0168
SCO2964	SCO1734
SCO5085	SCO6339
SCO3063	SCO3650
SCO2792	SCO5699
SCO2792	SCO4883
SCO5085	SCO5086
SCO2958	SCO5583
SCO5216	SCO2172
SCO2792	SCO5735
SCO3320	SCO5359
SCO5216	SCO4387
SCO0599	SCO2153
SCO1480	SCO0527
SCO6265	SCO4614
SCO2792	SCO2641
SCO2792	SCO6750
SCO5085	SCO0644
SCO6265	SCO5774
SCO5216	SCO4468
SCO4180	SCO2594
SCO5085	SCO4790
SCO0204	SCO2917
SCO5085	SCO1699
SCO2958	SCO2275
SCO5085	SCO0996
SCO2792	SCO4253
SCO6265	SCO6280
SCO5216	SCO3322
SCO3063	SCO2370
SCO3320	SCO1516
SCO2792	SCO5930
SCO5085	SCO2478
SCO2792	SCO6635
SCO3063	SCO5126
SCO5231	SCO6232
SCO2792	SCO4864
SCO1480	SCO5749
SCO2964	SCO7740
SCO1480	SCO5794
SCO0204	SCO1173
SCO2792	SCO4509
SCO5085	SCO5083
SCO0204	SCO4858
SCO1480	SCO5005
SCO1480	SCO4509
SCO0204	SCO2426
SCO0204	SCO1674
SCO4230	SCO4228
SCO5216	SCO2975
SCO5216	SCO1820
SCO0204	SCO3312
SCO3063	SCO4235
SCO2792	SCO2001
SCO0204	SCO0277
SCO3356	SCO3046
SCO3356	SCO7747
SCO5085	SCO6932
SCO5085	SCO5718
SCO2958	SCO0898
SCO2792	SCO7324
SCO1489	SCO6759
SCO2792	SCO4387
SCO0204	SCO2262
SCO3356	SCO1660
SCO0204	SCO4883
SCO2792	SCO5208
SCO5085	SCO4586
SCO5085	SCO2601
SCO3291	SCO2560
SCO5216	SCO7632
SCO3063	SCO1672
SCO5216	SCO2193
SCO0204	SCO5510
SCO1489	SCO6104
SCO0204	SCO2879
SCO0608	SCO1550
SCO4180	SCO2562
SCO5085	SCO3190
SCO0204	SCO6214
SCO1489	SCO1946
SCO0204	SCO2085
SCO2792	SCO4827
SCO5085	SCO3111
SCO5778	SCO1824
SCO5085	SCO5379
SCO1480	SCO5803
SCO3320	SCO2321
SCO4159	SCO2301
SCO4180	SCO5741
SCO3063	SCO3943
SCO5216	SCO1918
SCO0204	SCO3672
SCO5085	SCO2879
SCO5778	SCO1396
SCO1489	SCO3874
SCO2964	SCO2171
SCO5820	SCO0930
SCO1480	SCO6553
SCO2120	SCO4515
SCO3063	SCO7184
SCO0608	SCO4425
SCO4180	SCO2991
SCO5216	SCO3349
SCO5216	SCO1547
SCO5260	SCO2914
SCO2792	SCO1947
SCO2792	SCO5626
SCO0204	SCO4771
SCO3356	SCO5358
SCO0204	SCO4238
SCO3356	SCO7218
SCO3320	SCO2440
SCO3291	SCO6104
SCO3320	SCO2395
SCO4230	SCO3790
SCO3129	SCO1723
SCO0204	SCO5667
SCO3291	SCO2171
SCO5206	SCO0379
SCO4180	SCO6750
SCO5085	SCO5887
SCO0204	SCO5625
SCO3320	SCO5697
SCO3063	SCO1026
SCO1480	SCO2834
SCO3063	SCO4798
SCO5778	SCO6407
SCO5216	SCO2003
SCO4180	SCO2090
SCO0204	SCO7404
SCO4159	SCO2198
SCO3129	SCO2234
SCO0608	SCO1541
SCO0204	SCO7021
SCO2792	SCO6475
SCO0204	SCO1176
SCO4180	SCO2612
SCO0204	SCO4458
SCO3356	SCO6962
SCO2964	SCO6335
SCO2792	SCO1496
SCO3320	SCO2562
SCO2792	SCO1509
SCO2792	SCO4494
SCO2386	SCO2179
SCO5216	SCO5622
SCO2792	SCO2039
SCO3291	SCO3323
SCO3356	SCO2195
SCO3320	SCO4662
SCO3063	SCO2635
SCO2792	SCO3974
SCO5216	SCO3403
SCO0204	SCO1865
SCO0204	SCO6424
SCO2792	SCO3151
SCO0599	SCO4688
SCO2792	SCO4722
SCO3063	SCO5388
SCO5085	SCO0211
SCO1480	SCO2067
SCO6265	SCO5512
SCO4180	SCO5290
SCO3063	SCO2892
SCO0204	SCO2089
SCO2792	SCO4469
SCO2792	SCO4231
SCO0204	SCO2206
SCO0204	SCO6750
SCO2935	SCO6981
SCO2964	SCO2946
SCO5082	SCO5079
SCO2792	SCO2132
SCO3356	SCO3397
SCO0599	SCO5998
SCO0204	SCO5491
SCO0204	SCO5139
SCO2792	SCO2064
SCO6286	SCO1838
SCO1489	SCO6941
SCO4180	SCO3767
SCO1489	SCO1998
SCO4159	SCO1863
SCO0204	SCO3409
SCO2792	SCO1436
SCO2792	SCO1663
SCO2792	SCO3564
SCO1480	SCO1965
SCO1489	SCO5632
SCO2792	SCO4812
SCO0204	SCO5414
SCO5085	SCO5520
SCO6286	SCO3195
SCO2792	SCO3117
SCO2792	SCO4907
SCO0599	SCO5198
SCO3201	SCO2946
SCO0204	SCO5716
SCO5206	SCO3577
SCO6685	SCO0910
SCO2792	SCO4323
SCO5216	SCO5809
SCO4230	SCO4879
SCO3320	SCO6102
SCO2792	SCO2115
SCO0194	SCO7466
SCO5216	SCO1513
SCO0204	SCO5658
SCO3063	SCO6139
SCO3668	SCO0908
SCO5217	SCO7126
SCO0204	SCO6564
SCO4596	SCO7120
SCO0599	SCO3257
SCO2792	SCO1766
SCO1489	SCO4180
SCO5243	SCO5199
SCO4230	SCO4878
SCO2792	SCO1516
SCO6286	SCO6282
SCO5260	SCO5329
SCO2792	SCO4595
SCO2964	SCO7600
SCO1489	SCO2300
SCO4596	SCO1122
SCO3129	SCO4249
SCO4230	SCO4873
SCO3320	SCO2091
SCO0194	SCO5933
SCO2792	SCO1599
SCO6685	SCO5141
SCO3063	SCO7336
SCO2792	SCO1122
SCO3320	SCO3016
SCO3356	SCO5398
SCO3320	SCO0929
SCO3226	SCO1387
SCO3356	SCO0181
SCO4118	SCO3051
SCO1480	SCO3748
SCO0204	SCO3974
SCO0204	SCO2951
SCO0204	SCO1118
SCO3063	SCO0201
SCO0194	SCO0884
SCO1480	SCO3291
SCO0204	SCO6794
SCO2935	SCO1384
SCO6286	SCO2492
SCO4180	SCO5833
SCO6265	SCO0246
SCO0204	SCO2969
SCO0599	SCO2103
SCO4426	SCO5193
SCO2928	SCO5966
SCO1489	SCO2115
SCO5085	SCO4614
SCO3063	SCO3309
SCO1576	SCO2788
SCO0204	SCO1811
SCO3323	SCO4394
SCO0204	SCO5151
SCO3063	SCO2093
SCO2935	SCO5458
SCO0204	SCO5624
SCO2792	SCO6071
SCO0204	SCO0681
SCO2792	SCO3822
SCO0561	SCO0884
SCO5216	SCO3647
SCO2792	SCO2107
SCO1489	SCO4883
SCO4426	SCO3534
SCO0599	SCO1901
SCO1489	SCO4751
SCO6685	SCO5642
SCO3320	SCO3632
SCO5231	SCO5841
SCO2792	SCO2916
SCO5216	SCO5749
SCO0204	SCO7358
SCO4596	SCO5397
SCO1576	SCO4293
SCO4596	SCO3015
SCO5085	SCO0315
SCO2792	SCO2076
SCO3356	SCO7385
SCO2792	SCO5624
SCO2792	SCO2138
SCO1489	SCO1082
SCO4180	SCO5622
SCO0600	SCO5864
SCO5085	SCO7040
SCO1480	SCO1028
SCO6265	SCO4662
SCO3356	SCO0402
SCO0204	SCO4589
SCO3129	SCO3868
SCO4596	SCO6666
SCO2935	SCO4325
SCO3323	SCO3719
SCO3320	SCO2162
SCO3129	SCO5475
SCO1489	SCO6710
SCO4596	SCO4249
SCO0204	SCO3762
SCO5085	SCO5070
SCO3356	SCO3134
SCO2792	SCO5749
SCO4180	SCO6531
SCO0194	SCO1544
SCO2792	SCO2116
SCO3320	SCO2370
SCO3668	SCO0108
SCO0204	SCO1779
SCO3063	SCO7374
SCO3063	SCO1212
SCO3320	SCO3626
SCO3063	SCO6564
SCO3356	SCO3048
SCO5085	SCO5658
SCO0204	SCO2146
SCO0204	SCO2682
SCO4907	SCO3355
SCO3320	SCO2614
SCO0204	SCO3032
SCO3356	SCO2161
SCO2792	SCO5475
SCO0204	SCO1112
SCO5216	SCO5555
SCO2792	SCO3906
SCO3129	SCO5216
SCO3129	SCO4346
SCO0204	SCO5557
SCO0194	SCO5293
SCO0204	SCO1423
SCO2792	SCO0222
SCO0204	SCO2725
SCO3320	SCO7358
SCO2935	SCO3971
SCO3201	SCO1056
SCO4596	SCO7274
SCO2792	SCO3045
SCO0204	SCO1776
SCO5071	SCO5075
SCO5877	SCO5878
SCO5071	SCO5090
SCO5071	SCO5089
SCO5071	SCO5073
SCO5877	SCO5887
SCO5877	SCO5890
SCO0204	SCO0212
SCO0608	SCO0607
SCO0204	SCO0217
SCO5570	SCO5592
SCO5877	SCO5879
SCO5570	SCO5571
SCO5804	SCO5805
SCO0204	SCO0219
SCO5570	SCO5572
SCO3323	SCO1627
SCO5071	SCO5081
SCO5570	SCO1998
SCO5877	SCO5895
SCO5570	SCO4735
SCO6008	SCO6009
SCO3323	SCO1474
SCO5570	SCO1600
SCO5877	SCO5889
SCO5216	SCO5217
SCO5570	SCO1491
SCO5570	SCO4734
SCO5570	SCO4647
SCO5085	SCO6992
SCO3320	SCO4079
SCO3323	SCO1626
SCO0204	SCO0198
SCO0204	SCO0199
SCO0204	SCO0218
SCO3323	SCO6797
SCO2792	SCO3904
SCO5570	SCO4727
SCO5071	SCO5077
SCO5071	SCO5074
SCO5082	SCO1909
SCO6008	SCO6010
SCO5570	SCO4723
SCO4180	SCO2615
SCO3323	SCO1860
SCO4159	SCO2593
SCO5570	SCO4728
SCO1480	SCO4441
SCO3320	SCO3318
SCO5877	SCO5886
SCO4180	SCO5744
SCO5570	SCO3881
SCO5582	SCO4920
SCO5071	SCO5078
SCO3323	SCO5177
SCO5085	SCO1773
SCO3859	SCO2969
SCO3202	SCO2167
SCO0608	SCO4225
SCO1576	SCO1580
SCO5570	SCO5591
SCO5570	SCO3907
SCO5570	SCO3880
SCO6008	SCO6011
SCO5570	SCO4729
SCO0204	SCO5271
SCO0204	SCO7511
SCO5260	SCO5259
SCO3323	SCO1674
SCO4180	SCO3792
SCO5570	SCO2597
SCO5071	SCO5087
SCO3063	SCO3062
SCO5085	SCO1533
SCO2792	SCO5837
SCO5570	SCO4636
SCO5820	SCO5357
SCO5071	SCO5085
SCO5877	SCO5888
SCO1576	SCO1570
SCO5877	SCO5898
SCO5552	SCO5554
SCO5570	SCO4646
SCO4180	SCO2051
SCO5819	SCO5827
SCO4180	SCO3961
SCO0204	SCO6042
SCO3571	SCO5627
SCO5570	SCO4561
SCO3859	SCO5547
SCO0204	SCO3945
SCO3323	SCO6796
SCO5570	SCO2596
SCO0204	SCO0220
SCO4180	SCO1509
SCO0204	SCO5817
SCO5071	SCO5079
SCO5570	SCO4648
SCO3320	SCO4814
SCO0608	SCO1699
SCO5071	SCO5080
SCO4180	SCO4179
SCO5570	SCO4725
SCO5582	SCO7252
SCO1489	SCO1479
SCO3571	SCO5292
SCO3320	SCO4068
SCO1489	SCO5545
SCO3320	SCO3319
SCO2950	SCO4328
SCO2140	SCO5809
SCO5570	SCO5029
SCO2950	SCO3409
SCO1576	SCO1578
SCO5085	SCO2519
SCO2792	SCO0525
SCO5570	SCO4718
SCO5071	SCO5084
SCO3375	SCO2843
SCO4180	SCO3629
SCO2792	SCO3571
SCO4180	SCO3795
SCO5570	SCO5370
SCO5570	SCO1598
SCO4180	SCO4333
SCO3202	SCO2168
SCO2140	SCO5843
SCO4180	SCO1651
SCO3571	SCO2792
SCO1489	SCO3405
SCO0204	SCO3182
SCO3320	SCO4475
SCO5085	SCO4187
SCO4159	SCO2594
SCO3571	SCO5626
SCO3323	SCO1630
SCO4180	SCO1502
SCO5570	SCO5544
SCO5570	SCO5373
SCO5071	SCO5088
SCO5570	SCO5372
SCO5820	SCO6001
SCO3549	SCO5724
SCO3320	SCO3092
SCO5570	SCO1517
SCO3320	SCO4472
SCO4180	SCO3347
SCO3571	SCO5293
SCO3320	SCO4470
SCO5570	SCO5371
SCO3571	SCO5514
SCO4180	SCO3303
SCO5570	SCO2620
SCO5082	SCO4266
SCO0204	SCO4690
SCO5570	SCO5368
SCO5877	SCO5897
SCO3323	SCO6795
SCO3571	SCO5499
SCO0194	SCO0185
SCO3320	SCO5409
SCO0204	SCO3571
SCO5570	SCO1594
SCO2792	SCO1489
SCO2792	SCO3569
SCO5582	SCO1943
SCO2140	SCO6312
SCO5570	SCO5736
SCO3571	SCO4068
SCO3320	SCO4077
SCO4180	SCO2614
SCO4180	SCO5813
SCO5570	SCO5293
SCO5570	SCO1516
SCO2792	SCO2884
SCO1480	SCO6128
SCO0608	SCO1700
SCO4180	SCO6060
SCO4180	SCO1508
SCO5570	SCO5593
SCO5570	SCO5705
SCO3375	SCO4955
SCO5570	SCO2563
SCO5570	SCO5595
SCO5570	SCO3124
SCO5570	SCO4701
SCO2140	SCO4180
SCO5570	SCO4282
SCO5570	SCO4722
SCO1576	SCO1577
SCO5877	SCO5894
SCO3549	SCO4411
SCO5819	SCO5826
SCO3320	SCO4723
SCO2950	SCO5409
SCO3859	SCO3678
SCO3571	SCO4687
SCO4907	SCO1509
SCO3320	SCO4078
SCO4180	SCO6031
SCO4180	SCO5059
SCO5085	SCO7460
SCO3320	SCO7000
SCO5819	SCO3350
SCO4180	SCO2301
SCO2792	SCO7404
SCO5243	SCO5244
SCO5570	SCO4716
SCO5570	SCO4654
SCO0204	SCO0171
SCO5877	SCO5891
SCO5570	SCO4858
SCO2140	SCO4178
SCO4180	SCO1818
SCO5820	SCO3404
SCO4180	SCO2972
SCO3571	SCO5501
SCO5570	SCO7510
SCO5582	SCO3618
SCO2792	SCO4859
SCO3323	SCO6394
SCO4180	SCO4161
SCO5085	SCO1089
SCO4180	SCO3820
SCO3323	SCO1629
SCO5085	SCO4189
SCO3320	SCO4770
SCO3668	SCO3671
SCO5260	SCO4240
SCO4228	SCO1906
SCO2792	SCO2357
SCO5570	SCO4702
SCO5405	SCO5728
SCO0194	SCO0190
SCO5071	SCO5083
SCO5552	SCO5553
SCO0204	SCO0203
SCO0204	SCO3946
SCO3571	SCO3901
SCO3571	SCO1798
SCO3859	SCO5512
SCO5570	SCO4653
SCO4159	SCO5515
SCO0204	SCO0173
SCO3571	SCO5291
SCO4180	SCO1439
SCO3859	SCO2504
SCO5570	SCO5624
SCO5570	SCO4719
SCO3571	SCO1945
SCO4907	SCO1818
SCO5071	SCO5072
SCO3571	SCO5498
SCO4180	SCO3067
SCO5260	SCO2920
SCO5570	SCO4649
SCO0194	SCO0187
SCO5570	SCO5625
SCO5085	SCO5415
SCO5570	SCO1599
SCO4180	SCO5812
SCO1576	SCO6755
SCO5085	SCO3051
SCO2140	SCO3822
SCO3859	SCO2968
SCO2140	SCO2916
SCO3323	SCO1628
SCO5570	SCO4726
SCO4180	SCO1501
SCO4180	SCO4797
SCO4180	SCO3576
SCO4180	SCO4559
SCO3571	SCO0513
SCO5570	SCO4730
SCO1480	SCO2368
SCO3323	SCO5176
SCO4180	SCO3858
SCO5877	SCO5896
SCO3358	SCO3356
SCO5877	SCO5880
SCO4180	SCO1018
SCO4180	SCO1438
SCO2140	SCO3856
SCO5723	SCO3852
SCO4180	SCO4958
SCO3859	SCO6758
SCO3549	SCO5725
SCO5570	SCO2136
SCO5570	SCO1595
SCO3571	SCO3877
SCO5570	SCO4705
SCO5260	SCO5229
SCO2950	SCO0204
SCO5570	SCO4707
SCO1489	SCO4854
SCO0204	SCO0211
SCO5582	SCO4442
SCO4180	SCO2140
SCO5570	SCO5281
SCO5216	SCO4956
SCO5570	SCO5513
SCO0204	SCO5555
SCO3859	SCO4352
SCO3202	SCO2723
SCO4180	SCO4041
SCO5085	SCO3632
SCO0599	SCO6885
SCO4180	SCO5488
SCO2140	SCO5698
SCO3320	SCO3317
SCO3571	SCO4645
SCO4180	SCO1947
SCO5570	SCO4720
SCO4180	SCO2061
SCO5570	SCO1515
SCO4159	SCO2592
SCO2792	SCO3808
SCO5260	SCO5115
SCO4180	SCO4966
SCO3571	SCO5628
SCO3320	SCO3184
SCO3320	SCO5867
SCO5570	SCO5543
SCO3859	SCO4469
SCO5570	SCO4713
SCO0194	SCO0189
SCO5582	SCO5460
SCO3571	SCO4366
SCO1576	SCO5552
SCO4180	SCO5699
SCO4425	SCO0393
SCO1576	SCO7036
SCO1839	SCO1646
SCO2792	SCO6310
SCO0608	SCO7613
SCO6265	SCO5588
SCO0204	SCO0169
SCO2950	SCO1638
SCO4180	SCO1760
SCO4907	SCO2073
SCO3320	SCO5628
SCO2792	SCO3843
SCO3320	SCO1930
SCO4180	SCO2039
SCO5570	SCO5706
SCO5260	SCO6010
SCO3202	SCO3958
SCO0194	SCO0195
SCO5260	SCO2010
SCO3571	SCO4041
SCO5085	SCO6422
SCO1489	SCO1772
SCO2140	SCO4550
SCO5570	SCO5360
SCO4159	SCO5541
SCO4180	SCO2115
SCO3549	SCO4131
SCO3579	SCO7246
SCO3859	SCO3854
SCO3198	SCO7460
SCO3320	SCO4687
SCO4180	SCO2054
SCO5570	SCO4635
SCO3323	SCO6794
SCO5570	SCO4661
SCO0204	SCO1866
SCO2950	SCO3576
SCO1489	SCO2303
SCO2950	SCO3877
SCO5570	SCO5868
SCO2950	SCO2088
SCO2792	SCO2904
SCO5570	SCO4652
SCO3202	SCO1543
SCO3571	SCO3649
SCO3571	SCO4179
SCO3571	SCO5500
SCO5877	SCO5085
SCO2950	SCO4614
SCO7341	SCO0488
SCO3320	SCO2879
SCO3571	SCO3565
SCO5405	SCO0222
SCO4394	SCO4577
SCO5723	SCO4281
SCO5085	SCO0401
SCO3063	SCO3974
SCO3320	SCO5546
SCO3571	SCO4296
SCO4180	SCO5711
SCO2950	SCO2087
SCO3571	SCO4328
SCO2792	SCO3932
SCO2140	SCO5426
SCO5405	SCO1936
SCO3549	SCO6128
SCO3859	SCO2018
SCO3356	SCO4934
SCO5820	SCO2001
SCO2792	SCO1676
SCO2140	SCO3619
SCO2792	SCO3543
SCO2950	SCO4013
SCO4180	SCO4824
SCO5570	SCO2971
SCO3571	SCO5405
SCO4907	SCO3060
SCO5570	SCO4704
SCO2935	SCO6065
SCO4180	SCO1934
SCO1576	SCO6109
SCO3571	SCO2912
SCO0608	SCO1753
SCO4180	SCO3678
SCO2792	SCO3420
SCO1480	SCO1943
SCO3571	SCO4824
SCO3320	SCO1254
SCO3320	SCO3345
SCO3320	SCO6225
SCO3323	SCO4675
SCO3579	SCO4409
SCO3356	SCO3357
SCO2950	SCO3301
SCO2950	SCO3124
SCO3571	SCO3068
SCO4180	SCO4556
SCO2792	SCO3903
SCO4180	SCO3794
SCO5570	SCO1922
SCO5570	SCO2504
SCO2140	SCO5873
SCO4091	SCO2097
SCO2140	SCO5580
SCO2950	SCO2612
SCO3320	SCO4637
SCO4180	SCO6260
SCO4180	SCO6124
SCO5085	SCO0387
SCO5570	SCO5501
SCO5570	SCO0247
SCO3063	SCO6493
SCO5820	SCO2102
SCO3323	SCO1800
SCO1489	SCO1771
SCO5570	SCO4721
SCO3549	SCO2514
SCO2792	SCO5650
SCO3859	SCO3345
SCO5570	SCO4637
SCO5260	SCO6011
SCO5570	SCO4706
SCO3320	SCO3068
SCO4907	SCO5707
SCO1678	SCO4497
SCO3859	SCO4403
SCO4180	SCO3068
SCO2792	SCO1116
SCO2792	SCO2126
SCO5405	SCO1638
SCO4180	SCO4839
SCO3859	SCO2158
SCO5085	SCO5074
SCO3375	SCO2591
SCO5820	SCO5393
SCO3571	SCO1531
SCO5570	SCO5500
SCO3859	SCO2093
SCO3320	SCO5775
SCO4180	SCO5645
SCO5570	SCO4655
SCO5405	SCO5729
SCO5570	SCO3845
SCO5570	SCO4714
SCO4159	SCO3127
SCO3571	SCO5178
SCO1480	SCO4277
SCO5819	SCO5177
SCO0204	SCO2950
SCO5570	SCO5367
SCO5570	SCO4703
SCO3571	SCO7036
SCO3571	SCO5221
SCO4180	SCO3766
SCO5804	SCO4770
SCO3571	SCO4762
SCO4180	SCO3543
SCO5570	SCO5369
SCO4180	SCO5737
SCO2792	SCO3859
SCO5881	SCO4226
SCO3571	SCO2913
SCO3063	SCO2266
SCO4908	SCO3048
SCO5570	SCO3882
SCO4180	SCO3851
SCO5570	SCO4710
SCO4180	SCO2053
SCO1480	SCO5855
SCO5085	SCO4585
SCO5405	SCO5730
SCO5260	SCO5113
SCO5570	SCO3649
SCO5570	SCO4662
SCO4180	SCO3398
SCO4180	SCO3059
SCO5085	SCO5077
SCO5804	SCO6659
SCO4180	SCO5843
SCO4907	SCO2792
SCO2950	SCO5414
SCO5085	SCO0390
SCO2792	SCO2018
SCO2950	SCO6482
SCO3571	SCO3059
SCO1480	SCO2303
SCO2127	SCO5147
SCO0608	SCO0736
SCO2792	SCO1665
SCO5877	SCO2727
SCO3202	SCO6776
SCO4180	SCO7249
SCO3320	SCO5774
SCO2792	SCO2882
SCO4180	SCO5397
SCO1489	SCO3662
SCO2792	SCO3619
SCO5216	SCO3890
SCO1576	SCO5389
SCO4180	SCO2468
SCO5877	SCO2519
SCO5283	SCO1401
SCO4908	SCO3714
SCO5570	SCO4659
SCO0204	SCO7699
SCO2950	SCO3564
SCO1489	SCO2301
SCO5085	SCO0382
SCO2950	SCO7000
SCO3320	SCO1934
SCO7278	SCO3420
SCO3198	SCO5415
SCO5085	SCO0409
SCO2792	SCO1476
SCO4034	SCO3134
SCO3571	SCO1296
SCO4180	SCO6148
SCO2950	SCO2375
SCO3859	SCO1521
SCO5877	SCO0393
SCO4159	SCO5537
SCO4159	SCO4837
SCO4180	SCO4542
SCO4394	SCO0705
SCO4180	SCO4323
SCO5723	SCO6624
SCO4180	SCO4751
SCO5260	SCO6009
SCO3859	SCO2549
SCO2792	SCO2879
SCO3320	SCO5371
SCO3859	SCO3844
SCO1489	SCO5396
SCO3202	SCO4585
SCO5260	SCO5230
SCO3859	SCO5546
SCO5570	SCO6468
SCO3198	SCO7613
SCO2140	SCO1390
SCO5785	SCO5784
SCO2792	SCO2973
SCO3549	SCO2082
SCO7341	SCO5612
SCO3320	SCO1663
SCO3323	SCO5826
SCO5570	SCO4660
SCO4180	SCO1758
SCO5570	SCO4712
SCO2120	SCO2061
SCO3202	SCO2722
SCO2792	SCO2314
SCO3571	SCO2880
SCO5582	SCO0701
SCO4180	SCO1652
SCO5071	SCO5076
SCO3320	SCO4614
SCO1480	SCO3323
SCO4180	SCO5058
SCO5582	SCO0684
SCO4180	SCO2073
SCO5570	SCO3404
SCO4907	SCO3036
SCO4425	SCO4903
SCO5582	SCO5218
SCO3320	SCO5743
SCO4394	SCO2680
SCO5877	SCO5893
SCO2140	SCO1476
SCO5552	SCO3033
SCO4908	SCO1749
SCO5260	SCO2011
SCO2950	SCO1521
SCO5819	SCO5174
SCO5552	SCO2579
SCO3129	SCO3574
SCO5405	SCO4209
SCO2950	SCO3571
SCO4180	SCO1503
SCO3859	SCO4078
SCO4180	SCO2052
SCO3579	SCO1749
SCO4180	SCO3823
SCO4908	SCO3194
SCO1839	SCO7246
SCO5820	SCO4129
SCO4180	SCO4645
SCO4180	SCO1213
SCO5570	SCO5135
SCO0204	SCO4252
SCO3571	SCO2147
SCO3320	SCO5553
SCO2140	SCO4281
SCO5570	SCO3908
SCO2950	SCO4855
SCO7341	SCO7290
SCO2792	SCO4238
SCO3549	SCO4509
SCO2950	SCO1930
SCO1480	SCO0705
SCO5217	SCO7555
SCO4180	SCO5062
SCO3859	SCO4785
SCO3320	SCO5999
SCO5820	SCO2164
SCO5570	SCO5594
SCO5552	SCO1576
SCO4159	SCO1945
SCO3859	SCO2085
SCO5570	SCO5292
SCO1678	SCO4205
SCO5570	SCO5627
SCO3320	SCO5570
SCO3320	SCO2913
SCO4425	SCO0409
SCO1480	SCO5723
SCO3320	SCO2180
SCO3571	SCO2950
SCO4180	SCO2112
SCO3323	SCO5174
SCO4180	SCO5353
SCO3571	SCO2793
SCO1576	SCO6756
SCO3859	SCO5355
SCO2127	SCO5590
SCO5231	SCO7692
SCO3859	SCO4328
SCO5820	SCO5497
SCO2140	SCO2196
SCO5570	SCO2580
SCO5570	SCO3906
SCO5570	SCO3320
SCO1480	SCO5244
SCO4180	SCO3060
SCO5570	SCO5499
SCO3571	SCO3859
SCO3859	SCO5740
SCO5570	SCO4785
SCO3571	SCO3794
SCO5216	SCO3373
SCO3859	SCO4494
SCO3320	SCO5543
SCO0204	SCO0617
SCO5820	SCO4232
SCO7278	SCO1864
SCO4180	SCO4968
SCO3320	SCO1213
SCO5570	SCO2314
SCO5085	SCO6163
SCO3320	SCO1924
SCO2792	SCO6013
SCO5570	SCO5522
SCO3549	SCO1796
SCO3571	SCO4238
SCO5570	SCO3909
SCO4180	SCO2279
SCO5231	SCO1515
SCO2140	SCO1960
SCO2140	SCO4209
SCO5405	SCO2155
SCO3320	SCO1907
SCO3323	SCO4793
SCO2950	SCO2013
SCO1489	SCO5569
SCO5085	SCO7613
SCO4180	SCO4043
SCO2792	SCO3878
SCO4180	SCO4177
SCO3571	SCO5464
SCO3859	SCO3337
SCO5552	SCO3122
SCO5085	SCO2927
SCO3859	SCO4282
SCO5570	SCO5564
SCO5570	SCO5626
SCO4180	SCO5809
SCO6265	SCO3190
SCO3571	SCO5355
SCO5405	SCO3615
SCO5570	SCO3731
SCO5877	SCO6196
SCO3320	SCO1501
SCO5405	SCO5135
SCO4180	SCO3856
SCO4907	SCO5708
SCO0608	SCO4584
SCO3579	SCO5351
SCO4180	SCO2151
SCO5570	SCO4856
SCO2792	SCO5696
SCO2950	SCO5876
SCO5819	SCO5175
SCO5085	SCO3975
SCO5071	SCO5092
SCO3063	SCO5048
SCO2140	SCO2080
SCO5216	SCO4967
SCO3320	SCO4827
SCO1576	SCO6108
SCO3323	SCO4677
SCO5085	SCO6728
SCO5723	SCO4489
SCO4907	SCO4556
SCO3320	SCO3381
SCO4907	SCO2972
SCO2792	SCO5396
SCO3571	SCO2881
SCO3063	SCO7358
SCO3859	SCO3421
SCO5570	SCO5804
SCO3571	SCO7510
SCO4180	SCO5705
SCO5570	SCO4709
SCO5803	SCO2192
SCO0204	SCO0180
SCO4180	SCO2624
SCO3320	SCO2884
SCO4907	SCO1123
SCO2950	SCO3058
SCO3202	SCO5796
SCO5570	SCO4715
SCO5820	SCO3005
SCO2127	SCO0705
SCO3063	SCO5703
SCO4159	SCO2095
SCO5405	SCO6482
SCO5570	SCO4711
SCO5570	SCO2458
SCO3571	SCO5522
SCO4180	SCO4087
SCO4180	SCO4067
SCO2950	SCO1505
SCO3320	SCO2881
SCO3571	SCO3096
SCO2140	SCO2073
SCO2792	SCO5628
SCO5570	SCO6467
SCO2140	SCO4200
SCO5552	SCO2936
SCO2792	SCO2883
SCO2950	SCO5704
SCO3571	SCO2148
SCO2792	SCO7057
SCO5570	SCO1387
SCO4159	SCO2126
SCO2950	SCO6756
SCO0194	SCO0188
SCO5570	SCO1916
SCO2792	SCO3766
SCO3859	SCO4614
SCO5260	SCO6219
SCO5820	SCO5998
SCO3571	SCO1496
SCO5260	SCO4295
SCO5570	SCO3053
SCO4159	SCO6028
SCO1480	SCO2514
SCO2950	SCO5625
SCO7278	SCO2830
SCO5723	SCO6750
SCO4180	SCO2380
SCO5570	SCO2084
SCO5570	SCO4717
SCO5405	SCO1439
SCO3320	SCO4473
SCO1839	SCO3113
SCO4180	SCO3355
SCO3579	SCO1375
SCO1489	SCO5198
SCO3291	SCO5912
SCO1480	SCO3549
SCO5820	SCO5523
SCO3859	SCO2547
SCO3375	SCO6108
SCO5570	SCO5515
SCO2792	SCO5365
SCO4180	SCO2387
SCO3571	SCO3024
SCO4180	SCO3378
SCO3859	SCO5360
SCO3571	SCO5365
SCO3859	SCO5221
SCO3859	SCO2136
SCO2792	SCO4128
SCO4180	SCO5738
SCO1576	SCO0805
SCO4908	SCO4904
SCO3859	SCO0805
SCO2792	SCO0247
SCO4394	SCO0767
SCO3549	SCO3548
SCO3320	SCO3098
SCO4180	SCO1631
SCO3063	SCO3840
SCO3320	SCO1651
SCO2950	SCO4824
SCO3549	SCO2382
SCO1489	SCO3843
SCO3859	SCO3095
SCO2140	SCO2627
SCO5582	SCO2525
SCO3320	SCO4855
SCO4159	SCO2497
SCO3571	SCO3182
SCO4034	SCO1163
SCO2950	SCO4645
SCO5085	SCO7511
SCO4180	SCO2966
SCO2792	SCO6468
SCO4180	SCO3846
SCO5085	SCO0397
SCO4180	SCO4403
SCO0608	SCO4884
SCO1576	SCO5361
SCO3375	SCO3941
SCO3320	SCO6757
SCO3323	SCO3943
SCO5804	SCO1663
SCO3549	SCO1480
SCO3571	SCO5122
SCO1480	SCO5396
SCO4543	SCO3123
SCO3356	SCO7657
SCO4907	SCO2054
SCO5085	SCO3571
SCO2792	SCO4161
SCO2792	SCO1907
SCO3320	SCO4469
SCO4180	SCO2548
SCO4180	SCO2549
SCO3320	SCO2155
SCO2792	SCO2855
SCO1576	SCO1086
SCO1576	SCO6663
SCO2792	SCO3768
SCO2140	SCO6493
SCO3571	SCO2314
SCO3320	SCO4474
SCO4180	SCO3149
SCO5405	SCO1946
SCO3358	SCO3357
SCO2140	SCO1991
SCO2950	SCO3155
SCO5570	SCO3615
SCO3859	SCO3304
SCO7278	SCO2828
SCO4180	SCO2003
SCO4908	SCO3086
SCO5820	SCO6000
SCO5552	SCO5498
SCO4907	SCO2562
SCO2140	SCO4177
SCO5405	SCO0928
SCO4180	SCO0902
SCO1576	SCO1857
SCO3320	SCO4809
SCO1480	SCO5202
SCO2140	SCO2045
SCO4907	SCO5711
SCO3320	SCO1296
SCO4180	SCO4231
SCO3571	SCO1214
SCO3571	SCO7730
SCO7278	SCO7210
SCO5819	SCO4441
SCO3571	SCO3903
SCO2950	SCO4771
SCO5216	SCO1304
SCO3320	SCO1595
SCO5877	SCO5415
SCO3549	SCO2611
SCO6008	SCO2935
SCO2792	SCO5833
SCO3323	SCO1480
SCO3320	SCO0923
SCO3571	SCO5833
SCO1489	SCO0641
SCO2792	SCO4255
SCO3571	SCO4775
SCO0608	SCO5036
SCO4180	SCO5743
SCO2792	SCO4233
SCO5570	SCO4708
SCO3571	SCO0506
SCO3859	SCO3409
SCO5881	SCO5444
SCO3323	SCO4237
SCO3063	SCO7286
SCO1480	SCO2078
SCO5085	SCO4425
SCO2792	SCO4770
SCO3549	SCO2102
SCO5570	SCO1771
SCO0204	SCO4251
SCO5405	SCO3619
SCO3320	SCO5554
SCO4180	SCO2132
SCO5217	SCO2161
SCO4180	SCO5220
SCO4907	SCO3059
SCO4180	SCO3582
SCO5570	SCO3883
SCO5283	SCO2988
SCO5877	SCO4254
SCO5877	SCO0392
SCO2950	SCO4294
SCO1568	SCO4942
SCO3571	SCO2879
SCO5085	SCO0391
SCO6265	SCO6483
SCO4425	SCO1773
SCO5085	SCO1810
SCO2950	SCO5145
SCO5085	SCO4265
SCO3320	SCO2154
SCO4180	SCO4235
SCO5085	SCO1088
SCO0204	SCO0922
SCO3063	SCO4752
SCO3859	SCO2266
SCO2950	SCO5355
SCO3358	SCO3194
SCO5085	SCO5265
SCO3571	SCO4732
SCO2792	SCO1114
SCO2140	SCO6261
SCO5405	SCO2151
SCO3571	SCO3345
SCO1489	SCO3663
SCO5260	SCO2637
SCO4180	SCO7366
SCO4159	SCO2081
SCO2792	SCO5627
SCO3571	SCO2052
SCO3571	SCO2548
SCO2950	SCO0222
SCO4180	SCO2149
SCO2140	SCO4497
SCO5085	SCO6162
SCO5723	SCO3008
SCO3859	SCO6623
SCO1576	SCO3877
SCO5570	SCO5290
SCO5877	SCO0401
SCO5405	SCO2129
SCO1480	SCO4411
SCO3320	SCO6199
SCO4180	SCO4646
SCO4180	SCO3962
SCO4180	SCO1946
SCO5582	SCO2868
SCO3571	SCO3823
SCO3323	SCO1675
SCO4180	SCO3337
SCO5570	SCO4855
SCO3202	SCO3956
SCO3571	SCO1254
SCO4180	SCO3311
SCO5570	SCO2879
SCO3202	SCO7536
SCO5082	SCO1356
SCO5820	SCO4130
SCO5085	SCO1541
SCO4180	SCO3970
SCO3202	SCO4005
SCO5570	SCO1505
SCO2792	SCO1937
SCO5071	SCO5086
SCO4907	SCO1508
SCO3320	SCO5354
SCO5877	SCO0382
SCO3320	SCO5367
SCO3320	SCO1921
SCO3198	SCO4011
SCO2792	SCO2961
SCO5260	SCO6591
SCO2140	SCO0730
SCO5877	SCO0384
SCO4180	SCO4825
SCO3198	SCO1541
SCO5570	SCO1947
SCO3549	SCO3618
SCO4159	SCO2094
SCO2950	SCO3678
SCO3375	SCO2505
SCO4180	SCO4236
SCO5570	SCO1213
SCO4180	SCO1488
SCO4425	SCO0391
SCO3320	SCO2181
SCO5570	SCO5366
SCO2950	SCO2086
SCO3375	SCO1691
SCO5216	SCO3889
SCO2792	SCO1771
SCO3356	SCO3870
SCO5570	SCO5289
SCO3320	SCO2084
SCO2950	SCO4472
SCO3668	SCO3136
SCO5723	SCO1672
SCO3859	SCO1517
SCO4180	SCO6013
SCO4180	SCO4919
SCO5804	SCO6662
SCO4907	SCO5699
SCO0608	SCO3958
SCO2792	SCO5357
SCO5582	SCO4114
SCO3571	SCO4662
SCO2792	SCO1935
SCO3202	SCO3390
SCO5820	SCO5598
SCO2950	SCO5547
SCO4180	SCO5365
SCO1489	SCO3846
SCO4228	SCO4144
SCO4180	SCO6312
SCO2792	SCO2369
SCO3320	SCO4825
SCO1576	SCO5355
SCO3063	SCO4777
SCO5085	SCO2322
SCO0204	SCO3823
SCO3320	SCO5869
SCO5216	SCO2161
SCO3571	SCO1663
SCO5405	SCO0527
SCO4180	SCO2093
SCO1576	SCO1597
SCO1576	SCO5366
SCO5570	SCO3098
SCO5405	SCO4259
SCO5881	SCO6950
SCO5570	SCO5900
SCO3320	SCO2089
SCO0608	SCO4572
SCO5570	SCO3411
SCO1576	SCO5976
SCO4180	SCO6071
SCO5820	SCO2607
SCO3571	SCO5289
SCO4180	SCO1829
SCO2792	SCO4179
SCO5216	SCO6551
SCO5582	SCO5150
SCO5804	SCO1924
SCO2950	SCO4966
SCO0204	SCO5777
SCO3320	SCO3878
SCO3571	SCO2904
SCO3202	SCO1375
SCO2140	SCO3036
SCO5804	SCO3882
SCO2792	SCO6493
SCO4907	SCO5812
SCO3549	SCO1633
SCO0204	SCO5111
SCO3571	SCO5388
SCO1576	SCO1490
SCO4907	SCO2052
SCO5071	SCO2519
SCO5877	SCO5892
SCO6265	SCO4036
SCO6520	SCO6685
SCO5582	SCO5243
SCO0204	SCO6574
SCO4180	SCO5491
SCO5071	SCO5082
SCO0204	SCO0616
SCO4180	SCO2154
SCO5570	SCO2389
SCO5570	SCO6097
SCO5217	SCO0788
SCO4180	SCO2038
SCO3375	SCO6197
SCO3859	SCO2086
SCO3375	SCO7404
SCO5820	SCO2836
SCO1489	SCO5495
SCO4180	SCO5859
SCO7341	SCO6833
SCO2386	SCO1477
SCO3549	SCO5170
SCO3859	SCO5111
SCO3571	SCO3650
SCO5570	SCO2116
SCO3571	SCO2620
SCO2935	SCO5599
SCO5552	SCO5512
SCO4180	SCO2150
SCO1489	SCO4812
SCO2792	SCO2610
SCO5819	SCO4545
SCO2792	SCO5838
SCO4091	SCO3008
SCO4180	SCO2034
SCO2950	SCO2620
SCO7278	SCO2829
SCO3320	SCO3421
SCO1489	SCO5991
SCO2140	SCO2105
SCO2792	SCO7516
SCO5552	SCO4813
SCO3320	SCO4366
SCO5582	SCO2079
SCO4180	SCO1798
SCO3320	SCO2148
SCO4180	SCO3024
SCO5552	SCO2788
SCO2140	SCO1123
SCO5552	SCO2088
SCO3320	SCO4231
SCO1489	SCO4722
SCO0608	SCO4924
SCO3549	SCO3420
SCO1480	SCO4920
SCO3356	SCO7342
SCO1576	SCO1514
SCO4180	SCO5267
SCO0204	SCO5647
SCO4180	SCO1960
SCO1576	SCO2287
SCO5570	SCO0622
SCO2935	SCO6008
SCO5216	SCO2005
SCO3571	SCO4233
SCO4180	SCO1311
SCO3129	SCO5143
SCO5405	SCO2053
SCO2792	SCO2881
SCO5570	SCO1655
SCO3859	SCO4647
SCO3859	SCO3878
SCO3571	SCO0246
SCO5570	SCO3854
SCO5570	SCO2571
SCO3356	SCO4263
SCO1480	SCO6157
SCO4180	SCO2640
SCO3202	SCO1421
SCO3859	SCO6948
SCO5552	SCO3098
SCO4091	SCO5507
SCO2140	SCO2034
SCO4180	SCO2125
SCO5351	SCO0673
SCO2792	SCO3873
SCO6265	SCO3881
SCO5085	SCO2287
SCO3571	SCO5624
SCO0561	SCO5004
SCO4180	SCO5721
SCO1950	SCO2600
SCO7278	SCO1867
SCO4180	SCO2156
SCO5552	SCO1495
SCO2127	SCO2368
SCO5351	SCO7253
SCO3571	SCO5743
SCO3859	SCO3184
SCO5351	SCO4408
SCO3571	SCO4403
SCO5820	SCO2064
SCO3579	SCO1241
SCO3356	SCO2999
SCO0608	SCO5660
SCO3859	SCO1765
SCO5820	SCO4722
SCO5582	SCO0685
SCO1480	SCO1489
SCO5552	SCO3895
SCO3571	SCO0623
SCO3320	SCO1923
SCO5723	SCO4394
SCO2950	SCO5440
SCO2950	SCO3659
SCO4159	SCO5397
SCO5552	SCO6754
SCO2950	SCO4137
SCO2935	SCO6062
SCO3375	SCO1766
SCO3320	SCO6753
SCO5260	SCO5114
SCO5085	SCO5502
SCO3375	SCO1563
SCO5405	SCO1945
SCO2792	SCO1296
SCO4180	SCO2155
SCO1489	SCO5998
SCO5877	SCO3236
SCO3859	SCO1798
SCO5570	SCO2969
SCO3323	SCO5148
SCO7341	SCO0602
SCO6280	SCO6279
SCO4180	SCO6125
SCO3320	SCO2149
SCO5820	SCO4654
SCO3320	SCO3945
SCO1576	SCO3024
SCO4907	SCO2941
SCO0608	SCO1749
SCO5820	SCO2838
SCO3571	SCO3615
SCO4180	SCO2600
SCO3198	SCO5683
SCO1489	SCO6762
SCO3323	SCO0931
SCO4180	SCO5731
SCO7278	SCO2831
SCO1489	SCO5537
SCO1480	SCO4232
SCO4180	SCO5500
SCO4907	SCO1438
SCO3320	SCO2136
SCO5570	SCO5745
SCO5570	SCO5111
SCO4180	SCO3968
SCO2792	SCO2549
SCO3063	SCO2129
SCO5552	SCO5529
SCO3198	SCO2516
SCO2950	SCO3187
SCO4180	SCO5736
SCO3859	SCO1510
SCO3358	SCO2836
SCO1489	SCO1480
SCO4180	SCO4233
SCO5804	SCO3421
SCO7341	SCO5438
SCO4907	SCO6312
SCO3571	SCO5625
SCO7341	SCO6386
SCO6265	SCO1767
SCO7341	SCO6232
SCO0599	SCO6759
SCO3063	SCO0804
SCO2950	SCO4732
SCO4180	SCO2126
SCO5570	SCO5359
SCO3579	SCO7253
SCO1576	SCO1762
SCO2950	SCO4474
SCO2140	SCO1439
SCO0204	SCO0170
SCO5552	SCO1214
SCO3202	SCO1088
SCO4180	SCO4858
SCO3859	SCO2019
SCO3202	SCO3957
SCO3202	SCO1648
SCO4425	SCO4187
SCO5085	SCO3343
SCO4180	SCO7022
SCO5820	SCO2608
SCO4180	SCO5352
SCO5260	SCO2831
SCO1489	SCO4128
SCO2950	SCO3190
SCO3320	SCO0246
SCO4180	SCO1409
SCO2792	SCO2440
SCO3320	SCO5545
SCO2950	SCO5464
SCO1678	SCO5503
SCO2950	SCO4720
SCO6265	SCO5777
SCO2792	SCO1479
SCO5552	SCO2043
SCO5570	SCO3859
SCO4180	SCO3882
SCO5405	SCO3095
SCO5570	SCO4857
SCO5260	SCO2830
SCO5570	SCO1473
SCO3323	SCO0685
SCO2792	SCO0846
SCO4907	SCO1768
SCO3859	SCO2458
SCO4180	SCO2577
SCO5820	SCO6637
SCO4180	SCO3852
SCO5216	SCO4181
SCO5405	SCO4180
SCO0204	SCO3832
SCO6265	SCO3375
SCO5570	SCO3187
SCO1678	SCO4387
SCO3320	SCO3795
SCO5552	SCO1514
SCO4180	SCO5708
SCO3320	SCO2151
SCO2950	SCO4809
SCO1489	SCO2617
SCO5881	SCO4872
SCO5231	SCO2074
SCO5804	SCO6661
SCO5552	SCO0222
SCO4091	SCO2078
SCO4180	SCO4808
SCO3320	SCO1922
SCO5723	SCO1480
SCO3571	SCO2612
SCO3571	SCO4165
SCO3323	SCO4772
SCO4159	SCO1937
SCO5085	SCO5957
SCO2792	SCO4282
SCO4180	SCO1775
SCO5723	SCO2947
SCO2792	SCO5178
SCO3202	SCO3940
SCO3549	SCO2235
SCO4180	SCO4490
SCO5552	SCO4470
SCO5552	SCO1490
SCO3571	SCO4078
SCO5216	SCO1997
SCO5405	SCO0929
SCO3571	SCO1212
SCO3375	SCO2395
SCO6008	SCO3624
SCO5570	SCO1934
SCO5820	SCO2525
SCO3063	SCO5560
SCO3063	SCO6341
SCO5405	SCO6627
SCO5570	SCO5546
SCO1839	SCO5466
SCO5405	SCO1935
SCO1480	SCO6637
SCO3859	SCO5289
SCO4180	SCO5730
SCO3063	SCO5212
SCO6265	SCO0277
SCO5804	SCO5356
SCO3571	SCO4472
SCO3549	SCO4091
SCO5405	SCO3062
SCO7278	SCO7325
SCO0204	SCO6531
SCO4159	SCO1907
SCO2792	SCO4559
SCO0608	SCO1543
SCO5819	SCO6323
SCO4394	SCO5590
SCO0204	SCO4253
SCO7341	SCO0333
SCO4394	SCO4017
SCO5804	SCO6551
SCO7341	SCO2834
SCO2120	SCO5475
SCO3063	SCO0506
SCO3549	SCO7820
SCO5582	SCO2523
SCO3571	SCO2150
SCO3859	SCO4724
SCO4180	SCO4750
SCO3202	SCO0973
SCO4034	SCO0685
SCO5085	SCO4165
SCO4184	SCO5390
SCO6008	SCO3563
SCO5405	SCO1591
SCO2792	SCO1215
SCO4180	SCO5971
SCO5820	SCO5386
SCO2950	SCO3792
SCO7341	SCO6329
SCO5819	SCO6157
SCO5820	SCO2435
SCO4180	SCO2148
SCO5570	SCO3543
SCO3217	SCO3236
SCO6265	SCO4732
SCO3859	SCO2037
SCO4180	SCO4178
SCO1576	SCO2013
SCO5570	SCO1521
SCO4180	SCO1937
SCO1576	SCO1569
SCO2792	SCO5293
SCO6265	SCO0231
SCO2792	SCO5694
SCO1576	SCO2612
SCO2140	SCO2103
SCO5820	SCO5196
SCO5820	SCO2667
SCO3859	SCO2562
SCO5403	SCO6910
SCO3571	SCO1116
SCO0204	SCO5775
SCO5260	SCO1198
SCO2792	SCO6627
SCO5260	SCO2591
SCO4908	SCO4613
SCO5085	SCO3110
SCO5243	SCO7251
SCO2140	SCO2038
SCO4180	SCO2225
SCO5085	SCO5380
SCO3571	SCO2125
SCO2140	SCO5549
SCO2950	SCO2579
SCO4180	SCO3346
SCO2950	SCO3344
SCO1576	SCO5498
SCO4180	SCO5740
SCO2792	SCO1502
SCO5877	SCO5484
SCO3859	SCO2643
SCO4180	SCO3649
SCO3571	SCO4721
SCO3571	SCO4761
SCO3571	SCO7220
SCO3571	SCO4180
SCO2792	SCO1210
SCO3571	SCO3820
SCO5804	SCO1921
SCO1576	SCO5513
SCO4180	SCO2388
SCO3549	SCO2368
SCO3579	SCO3134
SCO4091	SCO1633
SCO5570	SCO2149
SCO3571	SCO3184
SCO6265	SCO4037
SCO5085	SCO6993
SCO1839	SCO3288
SCO2935	SCO5857
SCO3202	SCO3111
SCO7341	SCO7077
SCO1480	SCO5582
SCO3375	SCO6606
SCO5570	SCO1490
SCO5405	SCO1921
SCO2120	SCO1676
SCO7278	SCO1866
SCO4180	SCO3768
SCO5570	SCO5545
SCO2792	SCO5999
SCO3579	SCO1550
SCO1489	SCO2580
SCO4180	SCO5707
SCO5405	SCO3961
SCO1576	SCO1814
SCO3571	SCO2037
SCO1480	SCO4854
SCO5405	SCO1495
SCO5085	SCO0220
SCO5085	SCO6424
SCO1576	SCO6754
SCO2127	SCO4610
SCO7341	SCO6924
SCO4180	SCO1424
SCO1568	SCO7047
SCO5351	SCO4442
SCO2140	SCO6960
SCO5570	SCO3409
SCO3320	SCO1840
SCO1576	SCO5290
SCO4180	SCO4245
SCO3571	SCO6753
SCO5552	SCO2682
SCO3571	SCO6622
SCO3375	SCO0741
SCO2792	SCO6098
SCO5217	SCO4205
SCO4180	SCO2576
SCO4180	SCO5501
SCO7341	SCO2422
SCO4180	SCO1476
SCO5552	SCO6756
SCO4180	SCO5787
SCO4907	SCO7286
SCO5405	SCO4233
SCO3571	SCO3767
SCO5552	SCO5542
SCO4180	SCO4494
SCO3549	SCO4300
SCO3571	SCO5425
SCO2792	SCO2225
SCO3571	SCO4814
SCO4908	SCO4226
SCO4180	SCO2147
SCO3549	SCO2236
SCO3323	SCO5218
SCO3579	SCO1645
SCO4180	SCO4540
SCO3375	SCO4043
[truncated: 21,909 more rows]

## Sheet: Inferred_All
TF	TG
SCO5085	SCO5071
SCO0204	SCO6041
SCO0204	SCO0207
SCO0204	SCO0200
SCO5085	SCO5072
SCO0204	SCO0215
SCO5085	SCO5087
SCO0204	SCO0210
SCO0204	SCO0208
SCO0204	SCO0201
SCO0204	SCO4689
SCO3668	SCO3669
SCO5082	SCO5083
SCO0194	SCO0186
SCO0204	SCO0168
SCO5085	SCO5086
SCO0204	SCO0179
SCO5085	SCO5083
SCO0204	SCO0167
SCO0561	SCO0560
SCO2792	SCO5876
SCO3356	SCO3194
SCO0204	SCO0209
SCO0204	SCO6482
SCO0204	SCO4296
SCO0204	SCO0174
SCO0204	SCO0213
SCO2792	SCO3615
SCO5085	SCO5877
SCO0204	SCO2882
SCO0204	SCO0214
SCO5082	SCO5084
SCO3668	SCO3670
SCO0204	SCO0177
SCO5085	SCO6164
SCO5085	SCO2628
SCO5552	SCO5553
SCO2792	SCO3096
SCO0204	SCO2950
SCO3668	SCO3671
SCO5085	SCO4584
SCO0204	SCO6717
SCO0204	SCO0923
SCO5552	SCO6265
SCO0204	SCO4652
SCO0194	SCO0191
SCO5085	SCO0216
SCO0204	SCO5624
SCO5085	SCO5883
SCO5216	SCO5769
SCO5216	SCO3890
SCO0204	SCO3858
SCO5085	SCO6752
SCO5216	SCO4967
SCO2792	SCO4323
SCO5085	SCO5461
SCO5085	SCO6339
SCO3063	SCO4238
SCO1489	SCO2082
SCO0204	SCO2162
SCO4180	SCO1601
SCO3356	SCO2999
SCO6008	SCO6009
SCO0204	SCO0216
SCO2792	SCO3117
SCO0204	SCO1500
SCO3320	SCO5281
SCO0608	SCO0607
SCO0204	SCO5626
SCO4180	SCO1808
SCO0204	SCO2917
SCO5217	SCO5216
SCO5085	SCO5078
SCO0204	SCO0217
SCO3323	SCO5390
SCO2792	SCO4231
SCO2792	SCO3974
SCO3323	SCO4768
SCO5085	SCO4614
SCO4180	SCO2951
SCO0204	SCO7511
SCO1576	SCO5512
SCO0204	SCO3945
SCO0204	SCO0171
SCO0204	SCO0197
SCO3320	SCO5366
SCO0204	SCO3409
SCO0204	SCO3576
SCO2792	SCO6750
SCO1576	SCO5976
SCO0204	SCO4858
SCO0204	SCO3819
SCO4180	SCO2974
SCO5085	SCO6932
SCO4159	SCO2594
SCO2792	SCO2093
SCO3320	SCO2116
SCO2792	SCO2018
SCO3356	SCO6722
SCO0204	SCO0219
SCO2792	SCO1496
SCO5082	SCO4266
SCO1576	SCO1580
SCO3320	SCO1531
SCO4180	SCO1496
SCO0204	SCO0173
SCO3320	SCO5626
SCO3320	SCO1934
SCO0204	SCO0198
SCO1489	SCO2792
SCO5216	SCO3324
SCO5216	SCO5217
SCO0204	SCO7040
SCO2792	SCO4282
SCO3320	SCO4652
SCO0204	SCO5137
SCO5085	SCO5879
SCO0204	SCO4690
SCO2792	SCO4253
SCO1576	SCO5389
SCO2792	SCO6071
SCO5082	SCO1356
SCO5085	SCO6162
SCO2792	SCO2548
SCO3356	SCO1659
SCO1576	SCO6663
SCO0204	SCO6564
SCO2792	SCO4233
SCO2792	SCO2879
SCO3320	SCO5514
SCO1576	SCO7463
SCO4159	SCO5746
SCO1489	SCO1998
SCO3320	SCO4662
SCO5082	SCO5079
SCO1576	SCO1487
SCO3320	SCO4813
SCO1576	SCO6752
SCO2792	SCO3565
SCO1576	SCO5061
SCO4907	SCO5707
SCO5085	SCO4791
SCO1576	SCO1979
SCO4180	SCO3904
SCO6265	SCO0246
SCO4907	SCO1123
SCO3320	SCO5289
SCO4159	SCO2592
SCO3320	SCO3564
SCO0194	SCO5356
SCO0204	SCO7358
SCO2792	SCO3820
SCO5085	SCO0409
SCO1576	SCO4293
SCO6265	SCO5774
SCO2792	SCO4883
SCO4907	SCO3063
SCO4907	SCO2528
SCO3320	SCO2115
SCO5085	SCO5878
SCO2792	SCO2917
SCO1576	SCO3381
SCO0204	SCO0928
SCO0204	SCO5777
SCO2792	SCO2085
SCO3356	SCO7658
SCO4180	SCO2539
SCO0204	SCO0616
SCO3063	SCO3840
SCO5085	SCO0720
SCO5216	SCO5042
SCO1489	SCO4128
SCO2792	SCO4494
SCO5085	SCO6728
SCO6265	SCO3190
SCO2792	SCO1947
SCO5085	SCO1029
SCO0194	SCO0190
SCO3323	SCO6798
SCO3320	SCO4252
SCO1489	SCO3941
SCO5085	SCO3152
SCO5260	SCO3821
SCO0204	SCO4827
SCO3320	SCO2019
SCO2792	SCO5743
SCO2792	SCO4722
SCO0608	SCO2168
SCO0204	SCO6164
SCO3356	SCO3358
SCO3356	SCO3119
SCO0204	SCO0170
SCO2792	SCO2162
SCO5082	SCO5073
SCO1489	SCO4812
SCO3356	SCO3357
SCO0204	SCO4808
SCO0204	SCO4243
SCO5085	SCO2601
SCO5085	SCO1909
SCO4180	SCO4469
SCO1480	SCO0703
SCO5085	SCO5588
SCO5085	SCO5887
SCO3320	SCO5359
SCO2792	SCO1517
SCO2792	SCO4776
SCO1489	SCO2115
SCO4180	SCO4260
SCO3320	SCO2788
SCO2792	SCO3025
SCO1576	SCO3116
SCO5085	SCO6424
SCO2792	SCO6622
SCO2792	SCO7164
SCO0204	SCO0924
SCO2792	SCO4469
SCO0194	SCO0195
SCO3063	SCO5212
SCO5552	SCO5529
SCO0204	SCO2089
SCO1576	SCO2170
SCO0204	SCO0617
SCO2792	SCO5626
SCO5778	SCO1396
SCO3320	SCO1516
SCO0204	SCO2904
SCO3356	SCO0170
SCO5231	SCO6232
SCO3356	SCO7342
SCO1576	SCO6339
SCO0204	SCO2389
SCO1576	SCO1483
SCO4907	SCO3822
SCO4159	SCO2497
SCO6265	SCO3320
SCO4907	SCO2640
SCO2792	SCO6717
SCO2792	SCO2449
SCO4159	SCO3092
SCO0204	SCO5047
SCO0204	SCO3820
SCO3129	SCO5143
SCO1576	SCO0216
SCO2792	SCO3005
SCO2792	SCO3906
SCO5243	SCO4114
SCO0204	SCO0805
SCO0204	SCO6531
SCO3320	SCO6102
SCO0204	SCO0181
SCO5085	SCO2478
SCO0204	SCO2969
SCO4596	SCO4804
SCO1576	SCO4690
SCO0204	SCO3894
SCO0204	SCO3672
SCO4180	SCO2562
SCO0204	SCO2879
SCO6265	SCO5625
SCO1576	SCO4077
SCO2792	SCO2301
SCO5085	SCO5885
SCO2792	SCO1210
SCO0204	SCO3895
SCO2792	SCO2125
SCO0204	SCO1865
SCO5085	SCO6170
SCO0204	SCO0222
SCO2792	SCO0506
SCO3356	SCO0162
SCO3356	SCO0168
SCO4907	SCO2615
SCO0194	SCO4688
SCO2792	SCO5208
SCO4159	SCO4561
SCO2792	SCO3026
SCO2792	SCO5275
SCO4159	SCO4880
SCO1576	SCO2788
SCO0204	SCO2682
SCO3063	SCO1273
SCO2792	SCO2913
SCO0194	SCO0188
SCO2792	SCO4812
SCO1576	SCO4661
SCO4907	SCO4561
SCO6265	SCO1505
SCO0194	SCO7465
SCO2792	SCO6031
SCO2792	SCO4397
SCO4907	SCO7286
SCO5085	SCO0644
SCO0204	SCO2066
SCO3320	SCO2395
SCO1489	SCO4688
SCO0204	SCO3943
SCO5216	SCO4633
SCO1480	SCO1965
SCO0204	SCO2146
SCO3063	SCO3650
SCO2792	SCO3968
SCO0204	SCO2951
SCO5085	SCO7511
SCO6265	SCO2950
SCO6265	SCO3895
SCO0204	SCO4245
SCO5085	SCO4903
SCO0599	SCO0990
SCO1489	SCO3845
SCO1489	SCO6060
SCO4159	SCO5397
SCO5085	SCO4013
SCO5085	SCO6421
SCO2792	SCO3184
SCO3356	SCO3397
SCO5085	SCO4813
SCO5085	SCO3261
SCO6265	SCO4614
SCO3320	SCO6060
SCO2792	SCO1509
SCO2792	SCO1599
SCO5216	SCO3889
SCO5085	SCO3901
SCO5085	SCO7040
SCO4159	SCO5737
SCO5552	SCO1244
SCO4180	SCO1665
SCO5260	SCO6044
SCO4159	SCO1547
SCO2792	SCO2115
SCO2792	SCO7516
SCO5405	SCO3096
SCO1576	SCO5595
SCO1480	SCO5569
SCO4159	SCO2597
SCO5085	SCO3190
SCO4907	SCO2241
SCO1576	SCO4984
SCO1489	SCO4883
SCO0204	SCO5028
SCO1576	SCO5388
SCO0204	SCO5625
SCO3063	SCO3799
SCO5085	SCO4690
SCO4907	SCO5859
SCO6265	SCO6564
SCO0204	SCO3822
SCO1489	SCO6675
SCO4907	SCO3355
SCO4180	SCO0247
SCO6265	SCO5512
SCO2792	SCO6635
SCO2792	SCO1766
SCO2792	SCO5371
SCO6265	SCO1864
SCO4180	SCO3767
SCO1576	SCO5834
SCO3063	SCO0201
SCO3063	SCO2212
SCO1576	SCO3966
SCO6265	SCO2879
SCO0204	SCO4734
SCO1489	SCO5143
SCO5085	SCO1543
SCO3320	SCO5736
SCO1489	SCO4159
SCO5085	SCO1699
SCO6265	SCO4705
SCO4159	SCO3820
SCO5071	SCO5075
SCO5071	SCO5089
SCO5071	SCO5092
SCO5071	SCO5072
SCO5071	SCO5079
SCO5071	SCO5086
SCO5071	SCO5085
SCO5071	SCO5078
SCO5071	SCO5090
SCO5071	SCO5087
SCO5071	SCO5076
SCO5071	SCO5080
SCO5071	SCO5073
SCO5071	SCO5088
SCO5071	SCO5074
SCO5071	SCO5091
SCO5877	SCO5878
SCO5071	SCO5077
SCO5071	SCO5083
SCO5071	SCO5081
SCO5071	SCO5084
SCO1489	SCO6104
SCO5877	SCO5887
SCO5877	SCO5886
SCO5877	SCO5897
SCO5082	SCO1909
SCO2792	SCO5699
SCO5877	SCO5890
SCO5570	SCO5592
SCO5877	SCO5895
SCO5570	SCO5571
SCO5570	SCO1998
SCO5877	SCO5889
SCO5071	SCO5082
SCO2792	SCO5262
SCO5877	SCO5888
SCO5570	SCO1491
SCO5877	SCO5891
SCO1489	SCO5855
SCO5877	SCO5896
SCO5570	SCO5572
SCO5570	SCO2597
SCO5570	SCO4734
SCO0204	SCO0212
SCO5071	SCO1178
SCO5877	SCO5893
SCO3320	SCO4079
SCO0204	SCO1811
SCO5570	SCO1600
SCO5570	SCO2596
SCO5085	SCO4187
SCO1576	SCO5544
SCO5570	SCO4728
SCO5570	SCO1598
SCO1576	SCO1577
SCO0204	SCO4581
SCO3320	SCO4814
SCO5877	SCO5898
SCO5570	SCO5591
SCO3202	SCO2167
SCO5570	SCO4647
SCO5570	SCO5595
SCO5570	SCO4716
SCO5570	SCO3881
SCO5804	SCO5805
SCO5570	SCO4729
SCO5877	SCO5879
SCO5570	SCO4735
SCO5570	SCO4723
SCO5570	SCO3880
SCO3320	SCO3318
SCO5570	SCO4727
SCO4159	SCO3972
SCO5570	SCO3907
SCO1576	SCO1570
SCO5085	SCO2519
SCO5570	SCO1516
SCO5570	SCO4702
SCO3859	SCO5547
SCO6008	SCO6010
SCO5570	SCO4718
SCO4180	SCO3792
SCO2792	SCO2138
SCO5570	SCO2563
SCO5877	SCO5894
SCO4159	SCO2974
SCO5570	SCO4561
SCO0608	SCO0381
SCO5570	SCO4705
SCO6265	SCO4635
SCO5570	SCO4730
SCO5570	SCO4707
SCO4180	SCO2615
SCO0204	SCO4614
SCO6265	SCO4814
SCO4180	SCO5813
SCO5570	SCO5593
SCO0204	SCO0218
SCO5260	SCO5259
SCO5570	SCO4648
SCO4180	SCO3347
SCO4159	SCO2593
SCO1576	SCO1302
SCO2792	SCO3904
SCO5570	SCO4661
SCO3320	SCO4078
SCO5570	SCO4703
SCO0204	SCO3946
SCO0204	SCO1560
SCO1480	SCO0527
SCO4159	SCO4164
SCO1576	SCO1578
SCO5877	SCO5880
SCO0204	SCO5999
SCO5570	SCO5544
SCO4180	SCO3303
SCO5085	SCO1773
SCO5570	SCO4713
SCO4180	SCO5744
SCO5570	SCO4720
SCO5570	SCO1515
SCO5570	SCO4653
SCO3320	SCO1937
SCO3571	SCO3901
SCO0204	SCO5588
SCO5570	SCO4715
SCO3323	SCO1627
SCO5552	SCO3184
SCO3320	SCO3092
SCO0204	SCO0220
SCO3323	SCO6797
SCO3571	SCO5514
SCO5085	SCO6992
SCO3323	SCO6394
SCO5570	SCO4654
SCO5570	SCO4717
SCO5570	SCO4709
SCO5570	SCO5368
SCO6008	SCO6011
SCO3571	SCO4328
SCO4180	SCO4966
SCO1576	SCO6109
SCO5570	SCO4714
SCO3571	SCO5291
SCO4180	SCO2051
SCO5570	SCO4725
SCO3571	SCO3877
SCO2792	SCO2884
SCO5570	SCO4858
SCO5570	SCO4701
SCO5085	SCO4586
SCO3323	SCO1474
SCO3323	SCO6796
SCO5570	SCO4659
SCO3320	SCO4077
SCO5085	SCO1428
SCO5570	SCO4711
SCO0204	SCO0199
SCO0204	SCO2390
SCO5085	SCO2518
SCO5085	SCO5074
SCO0599	SCO6924
SCO5570	SCO4706
SCO5570	SCO5705
SCO5570	SCO4710
SCO3323	SCO5177
SCO5570	SCO4721
SCO4180	SCO4161
SCO5570	SCO5371
SCO0204	SCO5128
SCO2792	SCO7324
SCO3063	SCO3062
SCO2792	SCO5837
SCO1576	SCO4646
SCO3323	SCO1626
SCO5570	SCO4649
SCO5570	SCO5029
SCO5085	SCO5073
SCO5085	SCO5076
SCO5570	SCO3906
SCO3320	SCO6083
SCO4596	SCO5220
SCO5085	SCO5075
SCO5582	SCO4920
SCO5085	SCO5079
SCO5570	SCO4712
SCO4180	SCO4333
SCO3320	SCO4068
SCO5570	SCO4635
SCO4180	SCO6124
SCO5570	SCO2136
SCO5085	SCO6422
SCO4180	SCO2042
SCO1480	SCO2580
SCO5570	SCO1594
SCO5570	SCO4704
SCO5570	SCO4646
SCO3859	SCO2969
SCO4180	SCO2061
SCO4596	SCO7528
SCO5570	SCO4719
SCO0194	SCO3127
SCO0561	SCO3549
SCO2792	SCO3569
SCO5552	SCO2788
SCO3571	SCO5292
SCO5552	SCO5554
SCO5570	SCO5370
SCO4180	SCO2301
SCO5570	SCO1599
SCO3320	SCO7000
SCO1576	SCO3198
SCO4180	SCO2614
SCO0204	SCO4213
SCO2950	SCO0204
SCO5570	SCO4708
SCO5552	SCO4293
SCO5085	SCO5658
SCO4180	SCO6750
SCO5877	SCO5892
SCO1480	SCO4441
SCO4180	SCO3149
SCO1576	SCO7465
SCO5570	SCO4660
SCO4180	SCO1509
SCO3063	SCO1212
SCO3063	SCO5999
SCO2120	SCO7443
SCO0204	SCO0211
SCO5570	SCO4636
SCO3375	SCO2591
SCO3571	SCO4687
SCO3320	SCO5371
SCO5570	SCO5373
SCO2792	SCO1489
SCO2792	SCO3896
SCO4180	SCO3961
SCO5570	SCO1517
SCO3320	SCO4716
SCO3320	SCO4727
SCO1135	SCO3093
SCO5085	SCO5077
SCO0204	SCO4647
SCO3320	SCO3962
SCO3320	SCO3319
SCO1480	SCO6128
SCO2792	SCO3564
SCO4180	SCO1508
SCO5570	SCO2620
SCO3320	SCO4470
SCO3571	SCO5627
SCO5071	SCO4266
SCO5071	SCO7008
SCO2950	SCO3409
SCO5570	SCO4282
SCO4180	SCO2594
SCO3320	SCO4660
SCO2792	SCO1806
SCO3571	SCO4068
SCO4159	SCO3117
SCO4180	SCO5059
SCO3571	SCO5499
SCO3571	SCO5626
SCO5570	SCO1505
SCO4180	SCO2039
SCO3320	SCO1930
SCO3320	SCO4659
SCO3320	SCO4723
SCO5570	SCO3909
SCO3320	SCO4475
SCO3320	SCO4728
SCO5570	SCO5624
SCO4180	SCO1651
SCO4180	SCO6031
SCO1489	SCO3405
SCO5085	SCO0390
SCO5778	SCO5260
SCO0204	SCO3181
SCO3323	SCO1628
SCO5085	SCO4189
SCO3320	SCO2562
SCO5570	SCO5706
SCO3571	SCO4824
SCO5570	SCO4726
SCO5570	SCO3124
SCO0608	SCO4884
SCO5085	SCO2548
SCO3549	SCO5724
SCO4180	SCO4179
SCO2950	SCO2088
SCO1489	SCO1479
SCO4180	SCO1438
SCO3320	SCO4726
SCO0204	SCO6042
SCO2140	SCO4180
SCO4230	SCO4229
SCO3323	SCO1674
SCO4180	SCO4248
SCO0204	SCO5491
SCO5570	SCO5736
SCO2792	SCO2357
SCO3320	SCO6225
SCO1576	SCO7036
SCO3859	SCO3678
SCO5570	SCO5360
SCO2792	SCO3843
SCO2792	SCO6536
SCO1489	SCO3092
SCO5570	SCO5372
SCO3320	SCO4701
SCO2792	SCO3903
SCO0600	SCO7325
SCO3320	SCO7021
SCO4159	SCO3068
SCO1576	SCO2976
SCO2792	SCO7404
SCO3063	SCO5126
SCO3320	SCO4661
SCO5570	SCO4652
SCO4180	SCO3795
SCO4180	SCO2387
SCO4180	SCO4559
SCO3323	SCO1860
SCO5085	SCO0401
SCO1489	SCO4180
SCO3320	SCO3907
SCO2140	SCO6312
SCO3320	SCO5373
SCO3320	SCO4703
SCO3320	SCO7102
SCO5570	SCO7510
SCO5570	SCO4662
SCO5071	SCO1909
SCO3571	SCO5464
SCO3320	SCO4702
SCO3320	SCO5370
SCO0204	SCO5752
SCO5260	SCO2010
SCO3571	SCO5501
SCO2792	SCO4859
SCO3571	SCO2913
SCO3859	SCO2968
SCO2792	SCO5627
SCO5582	SCO7252
SCO5085	SCO1089
SCO3323	SCO6794
SCO3323	SCO6795
SCO5085	SCO0387
SCO5570	SCO3908
SCO2792	SCO3846
SCO2950	SCO4328
SCO3571	SCO5293
SCO0204	SCO5261
SCO3571	SCO3576
SCO5260	SCO6010
SCO5819	SCO5827
SCO0204	SCO3182
SCO2792	SCO3543
SCO1489	SCO5545
SCO5570	SCO5868
SCO5260	SCO2011
SCO3571	SCO6753
SCO3549	SCO2514
SCO2792	SCO3420
SCO5085	SCO3312
SCO6265	SCO5588
SCO4180	SCO4556
SCO3320	SCO4708
SCO5570	SCO1595
SCO3571	SCO2147
SCO3571	SCO4472
SCO3859	SCO6758
SCO3375	SCO2843
SCO3571	SCO4162
SCO2140	SCO5809
SCO4180	SCO1502
SCO0204	SCO2221
SCO3859	SCO3345
SCO3320	SCO4472
SCO3320	SCO4770
SCO3571	SCO2912
SCO3571	SCO3678
SCO4907	SCO4233
SCO4180	SCO3629
SCO3320	SCO4717
SCO2792	SCO3768
SCO3320	SCO5774
SCO3320	SCO2879
SCO4180	SCO1818
SCO2792	SCO3895
SCO3320	SCO1922
SCO5552	SCO2043
SCO1576	SCO6108
SCO3320	SCO4718
SCO0204	SCO5366
SCO5570	SCO4722
SCO1489	SCO4854
SCO3571	SCO5498
SCO4159	SCO3846
SCO1480	SCO3549
SCO3859	SCO2158
SCO4180	SCO5812
SCO2792	SCO5396
SCO5877	SCO7221
SCO3859	SCO2085
SCO4180	SCO1439
SCO3549	SCO4411
SCO5082	SCO5081
SCO5082	SCO5071
SCO0608	SCO4225
SCO4180	SCO6531
SCO4180	SCO2052
SCO3571	SCO4296
SCO4180	SCO6060
SCO3571	SCO2792
SCO5570	SCO3404
SCO0204	SCO0180
SCO5216	SCO4956
SCO3375	SCO4955
SCO4180	SCO2972
SCO5085	SCO5265
SCO5085	SCO1426
SCO5260	SCO4240
SCO3320	SCO4707
SCO0204	SCO4883
SCO3320	SCO5367
SCO5570	SCO2971
SCO3320	SCO4729
SCO3571	SCO4645
SCO0204	SCO0203
SCO3859	SCO4403
SCO4180	SCO3858
SCO3571	SCO6752
SCO3571	SCO4762
SCO5570	SCO5293
SCO4180	SCO4323
SCO4180	SCO3820
SCO5570	SCO2116
SCO5085	SCO5896
SCO3320	SCO1935
SCO2950	SCO3301
SCO5820	SCO5357
SCO2950	SCO5409
SCO3320	SCO1491
SCO3571	SCO5221
SCO3571	SCO2612
SCO5085	SCO5415
SCO3320	SCO5368
SCO2792	SCO2061
SCO1489	SCO5717
SCO3320	SCO3345
SCO1480	SCO3568
SCO1576	SCO2383
SCO6265	SCO0924
SCO3320	SCO1595
SCO3320	SCO3098
SCO5085	SCO6163
SCO3320	SCO1655
SCO1480	SCO4509
SCO2140	SCO3347
SCO5877	SCO0393
SCO3320	SCO5570
SCO5260	SCO2920
SCO5260	SCO5229
SCO2792	SCO1116
SCO2792	SCO3571
SCO1576	SCO1086
SCO3859	SCO3337
SCO4907	SCO1509
SCO3320	SCO4712
SCO5877	SCO6196
SCO4180	SCO2388
SCO3320	SCO4637
SCO4907	SCO3347
SCO2792	SCO4827
SCO3320	SCO2321
SCO1480	SCO5803
SCO3320	SCO5543
SCO2792	SCO0525
SCO5085	SCO3051
SCO5085	SCO5957
SCO2792	SCO4239
SCO4180	SCO2053
SCO5570	SCO5594
SCO3356	SCO7657
SCO4180	SCO4087
SCO3571	SCO3649
SCO5570	SCO5513
SCO5085	SCO0397
SCO2792	SCO2973
SCO4180	SCO1760
SCO3571	SCO3564
SCO3320	SCO1254
SCO5570	SCO3320
SCO4180	SCO3060
SCO2792	SCO1652
SCO3571	SCO3024
SCO4180	SCO2279
SCO4180	SCO1758
SCO0608	SCO1550
SCO5820	SCO3404
SCO4180	SCO4958
SCO5085	SCO4790
SCO5085	SCO3975
SCO5819	SCO3350
SCO0204	SCO3954
SCO3571	SCO3794
SCO2792	SCO5488
SCO0608	SCO1699
SCO5804	SCO6659
SCO5582	SCO1943
SCO3571	SCO2793
SCO3859	SCO5546
SCO0608	SCO1648
SCO3320	SCO4714
SCO1489	SCO2303
SCO3571	SCO1501
SCO1576	SCO1857
SCO3320	SCO4709
SCO3320	SCO2571
SCO5071	SCO4265
SCO1480	SCO2514
SCO3571	SCO1945
SCO4180	SCO3582
SCO5570	SCO6097
SCO3320	SCO5369
SCO2792	SCO1665
SCO5570	SCO3098
SCO5552	SCO1423
SCO3356	SCO6772
SCO3320	SCO3317
SCO3320	SCO5372
SCO3859	SCO4469
SCO1576	SCO7466
SCO1576	SCO5552
SCO4180	SCO5397
SCO5877	SCO2519
SCO1489	SCO1772
SCO4180	SCO6260
SCO2792	SCO6310
SCO3571	SCO4732
SCO3571	SCO5355
SCO3323	SCO1800
SCO3320	SCO2154
SCO2792	SCO3045
SCO3571	SCO7036
SCO3571	SCO0506
SCO5570	SCO4655
SCO5570	SCO5515
SCO2792	SCO1595
SCO3859	SCO1212
SCO5570	SCO1387
SCO0204	SCO3098
SCO5085	SCO3801
SCO4159	SCO1651
SCO4180	SCO5711
SCO3320	SCO3381
SCO3320	SCO4720
SCO1576	SCO6660
SCO3571	SCO1531
SCO3323	SCO4237
SCO2950	SCO4827
SCO3320	SCO5777
SCO3571	SCO0513
SCO4180	SCO1018
SCO4180	SCO2115
SCO1489	SCO5357
SCO2792	SCO5650
SCO5570	SCO6468
SCO5570	SCO4637
SCO5582	SCO4442
SCO4180	SCO5833
SCO3063	SCO1496
SCO1576	SCO6755
SCO1489	SCO4858
SCO4180	SCO4751
SCO3571	SCO0622
SCO3859	SCO2019
SCO0194	SCO2300
SCO3571	SCO1214
SCO2792	SCO5726
SCO0608	SCO1753
SCO6265	SCO0923
SCO3320	SCO4705
SCO2140	SCO5843
SCO5570	SCO2969
SCO4180	SCO5699
SCO5405	SCO5728
SCO5085	SCO4585
SCO5570	SCO1922
SCO4180	SCO5491
SCO3320	SCO5409
SCO2792	SCO1676
SCO3571	SCO5405
SCO3323	SCO1630
SCO3859	SCO2504
SCO3202	SCO2723
SCO3320	SCO4706
SCO5570	SCO5625
SCO0608	SCO1647
SCO3859	SCO1521
SCO3571	SCO4366
SCO1576	SCO7464
SCO3320	SCO4855
SCO4180	SCO4492
SCO3859	SCO4470
SCO5570	SCO2504
SCO3571	SCO1798
SCO3859	SCO5512
SCO0608	SCO3958
SCO5085	SCO2927
SCO1489	SCO5737
SCO2950	SCO7000
SCO2792	SCO2126
SCO3571	SCO5122
SCO4180	SCO3962
SCO2950	SCO2612
SCO5085	SCO5080
SCO0204	SCO1176
SCO4180	SCO1934
SCO4180	SCO1501
SCO1576	SCO1432
SCO5082	SCO7008
SCO4907	SCO1818
SCO5085	SCO2321
SCO2792	SCO4238
SCO3571	SCO2880
SCO2792	SCO1213
SCO3571	SCO2881
SCO3320	SCO5776
SCO3571	SCO5624
SCO0204	SCO5122
SCO5570	SCO1771
SCO3320	SCO3184
SCO5260	SCO5113
SCO0194	SCO0185
SCO3320	SCO1505
SCO5820	SCO6001
SCO3320	SCO0923
SCO5570	SCO2458
SCO4180	SCO3794
SCO3571	SCO3859
SCO2792	SCO1479
SCO0204	SCO1651
SCO3320	SCO4710
SCO4180	SCO7249
SCO3859	SCO5360
SCO5082	SCO5080
SCO2140	SCO4178
SCO1576	SCO1569
SCO3323	SCO0931
SCO3320	SCO4856
SCO4180	SCO5645
SCO5570	SCO6467
SCO0204	SCO4474
SCO3320	SCO5546
SCO5570	SCO5281
SCO2792	SCO3972
SCO2792	SCO3822
SCO3571	SCO2548
SCO5260	SCO4295
SCO3571	SCO3615
SCO2792	SCO3941
SCO4180	SCO5741
SCO3320	SCO3908
SCO1480	SCO2368
SCO4180	SCO5721
SCO0194	SCO7466
SCO3859	SCO2086
SCO5085	SCO5897
SCO3202	SCO2168
SCO1576	SCO1597
SCO5260	SCO6219
SCO3320	SCO1916
SCO0204	SCO6013
SCO0204	SCO3724
SCO4180	SCO4231
SCO3320	SCO5595
SCO3571	SCO0623
SCO5082	SCO5092
SCO5804	SCO6661
SCO2792	SCO2882
SCO4159	SCO2116
SCO1576	SCO0104
SCO3571	SCO5365
SCO2140	SCO4177
SCO3859	SCO2547
SCO0599	SCO2153
SCO5570	SCO5545
SCO4425	SCO0393
SCO5570	SCO5522
SCO3320	SCO2149
SCO2792	SCO1907
SCO4180	SCO6148
SCO3320	SCO4648
SCO5260	SCO6591
SCO3320	SCO1921
SCO3571	SCO1947
SCO3571	SCO5628
SCO3320	SCO4725
SCO4180	SCO3067
SCO3571	SCO3565
SCO5085	SCO7460
SCO4180	SCO3059
SCO5082	SCO5077
SCO5085	SCO5898
SCO4425	SCO4903
SCO5570	SCO5367
SCO3320	SCO5354
SCO3320	SCO2881
SCO1489	SCO2301
SCO4180	SCO6013
SCO2935	SCO2914
SCO3320	SCO5628
SCO5820	SCO5497
SCO3571	SCO5553
SCO3571	SCO4079
SCO4180	SCO3576
SCO4159	SCO3790
SCO3571	SCO1510
SCO3571	SCO5289
SCO3859	SCO5388
SCO5570	SCO5543
SCO5877	SCO5899
SCO4425	SCO1773
SCO5570	SCO1776
SCO3859	SCO1776
SCO3320	SCO3068
SCO2792	SCO3878
SCO3859	SCO3844
SCO5552	SCO4701
SCO3320	SCO4785
SCO3859	SCO3184
SCO3571	SCO5388
SCO5071	SCO2478
SCO3859	SCO4352
SCO2950	SCO3877
SCO3571	SCO2129
SCO3129	SCO3592
SCO3320	SCO4704
SCO2792	SCO1771
SCO3571	SCO3068
SCO1576	SCO4111
SCO3571	SCO5409
SCO3571	SCO2052
SCO5570	SCO2571
SCO5405	SCO0222
SCO3320	SCO5775
SCO5877	SCO3228
SCO5085	SCO0394
SCO1576	SCO1600
SCO3571	SCO3184
SCO5552	SCO3033
SCO5085	SCO0388
SCO5260	SCO5230
SCO5085	SCO0391
SCO3571	SCO4179
SCO2792	SCO2904
SCO5260	SCO6009
SCO5803	SCO4347
SCO1576	SCO2287
SCO2792	SCO1476
SCO2950	SCO3058
SCO3320	SCO2181
SCO5570	SCO3731
SCO3202	SCO7536
SCO4180	SCO4041
SCO4180	SCO4839
SCO3320	SCO6753
SCO4180	SCO6125
SCO1489	SCO1771
SCO5405	SCO5730
SCO1839	SCO3113
SCO3320	SCO4649
SCO2950	SCO3576
SCO5570	SCO1655
SCO4180	SCO6312
SCO2792	SCO6468
SCO5877	SCO5415
SCO4180	SCO3311
SCO5820	SCO2102
SCO3571	SCO3345
SCO1480	SCO5794
SCO6265	SCO5776
SCO3320	SCO6199
SCO4180	SCO3678
SCO2792	SCO2314
SCO3320	SCO1924
SCO1576	SCO2317
SCO0194	SCO5976
SCO5552	SCO3384
SCO3323	SCO5174
SCO4180	SCO1775
SCO2140	SCO4200
SCO3571	SCO4814
SCO3859	SCO4494
SCO4907	SCO3036
SCO3571	SCO5135
SCO1480	SCO1943
SCO1576	SCO6662
SCO2950	SCO5414
SCO2140	SCO3619
SCO0204	SCO6758
SCO4159	SCO5515
SCO3320	SCO4857
SCO4180	SCO2140
SCO2140	SCO3858
SCO5405	SCO1936
SCO5085	SCO6663
SCO3571	SCO3854
SCO2792	SCO2116
SCO3320	SCO5553
SCO4180	SCO5730
SCO2792	SCO1798
SCO0204	SCO2122
SCO3320	SCO1594
SCO5552	SCO5573
SCO2792	SCO3766
SCO3320	SCO5571
SCO5570	SCO1510
SCO5877	SCO5085
SCO2950	SCO2013
SCO5085	SCO0996
SCO3571	SCO1599
SCO0204	SCO0277
SCO5085	SCO2322
SCO1576	SCO2262
SCO2792	SCO5628
SCO3320	SCO2155
SCO4180	SCO4824
SCO3320	SCO2084
SCO3323	SCO1629
SCO5570	SCO5564
SCO3859	SCO5355
SCO3571	SCO2879
SCO5877	SCO2518
SCO3063	SCO3820
SCO5570	SCO3187
SCO4180	SCO4797
SCO2950	SCO3124
SCO0204	SCO4242
SCO0204	SCO4253
SCO3571	SCO3795
SCO4180	SCO1947
SCO3320	SCO3966
SCO4180	SCO5062
SCO4180	SCO5208
SCO5570	SCO3845
SCO2950	SCO2375
SCO0204	SCO7102
SCO5085	SCO1533
SCO5570	SCO4856
SCO3320	SCO4711
SCO4180	SCO1503
SCO3320	SCO6757
SCO0204	SCO1026
SCO1480	SCO5855
SCO3320	SCO5554
SCO3571	SCO4294
SCO2792	SCO1591
SCO5820	SCO2001
SCO3571	SCO2148
SCO1576	SCO4955
SCO3320	SCO4735
SCO5260	SCO6011
SCO2140	SCO1390
SCO0204	SCO1030
SCO3571	SCO1638
SCO3320	SCO4715
SCO3320	SCO4687
SCO3320	SCO1923
SCO3320	SCO5999
SCO2792	SCO5365
SCO5570	SCO2580
SCO4159	SCO6102
SCO4159	SCO5541
SCO4180	SCO3823
SCO3320	SCO4808
SCO3859	SCO3854
SCO3859	SCO5221
SCO2792	SCO3567
SCO4180	SCO2548
SCO3571	SCO6310
SCO3320	SCO5355
SCO4180	SCO2090
SCO4180	SCO3766
SCO5570	SCO5359
SCO1576	SCO3649
SCO5405	SCO2370
SCO3859	SCO3409
SCO3571	SCO6755
SCO7341	SCO7290
SCO2950	SCO4614
SCO3320	SCO4614
SCO4180	SCO4009
SCO4180	SCO3068
SCO2950	SCO1930
SCO5552	SCO4813
SCO3323	SCO4793
SCO5085	SCO5895
SCO3571	SCO5513
SCO2792	SCO5745
SCO3571	SCO5290
SCO2792	SCO3845
SCO1576	SCO4330
SCO5085	SCO5880
SCO4180	SCO2553
SCO2950	SCO0219
SCO2792	SCO4128
SCO3320	SCO2148
SCO3859	SCO5822
SCO3358	SCO3356
SCO5260	SCO5115
SCO4180	SCO1600
SCO5570	SCO3298
SCO3320	SCO1840
SCO5552	SCO2936
SCO3202	SCO3958
SCO3063	SCO3974
SCO4907	SCO3060
SCO3571	SCO3059
SCO4180	SCO5705
SCO1489	SCO3409
SCO5570	SCO3882
SCO1489	SCO5231
SCO4907	SCO4777
SCO2950	SCO3190
SCO2950	SCO4013
SCO3571	SCO1496
SCO2140	SCO0525
SCO3320	SCO1599
SCO0204	SCO3060
SCO5804	SCO6551
SCO5570	SCO4814
SCO0204	SCO2426
SCO5085	SCO5893
SCO4180	SCO5488
SCO2792	SCO0846
SCO5877	SCO2727
SCO3320	SCO5867
SCO3859	SCO4328
SCO3571	SCO4041
SCO5085	SCO0382
SCO3571	SCO5425
SCO3571	SCO4855
SCO5820	SCO4776
SCO5405	SCO7510
SCO5260	SCO4431
SCO4907	SCO2073
SCO2950	SCO3123
SCO3320	SCO4794
SCO3571	SCO0246
SCO6265	SCO4662
SCO2792	SCO5735
SCO3859	SCO4647
SCO3320	SCO5499
SCO1839	SCO1646
SCO3063	SCO2266
SCO4180	SCO2468
SCO3571	SCO2950
SCO3323	SCO5176
SCO3063	SCO6493
SCO4180	SCO3882
SCO3320	SCO2136
SCO1489	SCO6260
SCO3571	SCO1296
SCO4180	SCO4808
SCO5877	SCO2321
SCO4180	SCO2151
SCO5085	SCO5886
SCO5582	SCO5460
SCO4180	SCO3378
SCO2950	SCO0222
SCO4394	SCO4577
SCO5570	SCO4785
SCO3063	SCO2370
SCO4180	SCO5843
SCO2792	SCO3795
SCO6265	SCO5775
SCO3571	SCO5500
SCO0204	SCO4771
SCO3571	SCO4813
SCO5570	SCO5542
SCO2140	SCO3856
SCO2950	SCO4472
SCO4180	SCO4550
SCO3571	SCO5833
SCO5570	SCO5292
SCO1480	SCO4411
SCO2140	SCO3822
SCO5552	SCO6095
SCO2792	SCO3808
SCO3571	SCO7730
SCO3859	SCO4282
SCO3571	SCO2969
SCO3320	SCO4366
SCO1576	SCO5136
SCO5260	SCO2591
SCO6265	SCO3375
SCO2950	SCO6756
SCO5582	SCO3618
SCO3320	SCO4653
SCO5570	SCO1521
SCO4159	SCO4009
SCO3063	SCO7184
SCO3859	SCO3098
SCO5570	SCO5900
SCO2792	SCO4236
SCO3571	SCO2125
SCO3323	SCO4677
SCO5570	SCO3411
SCO3859	SCO6623
SCO5082	SCO1178
SCO3571	SCO2904
SCO2792	SCO5930
SCO0204	SCO0922
SCO1489	SCO1946
SCO3320	SCO2913
SCO2950	SCO5704
SCO5552	SCO3122
SCO3549	SCO4131
SCO4159	SCO4813
SCO5552	SCO2789
SCO3320	SCO5544
SCO5085	SCO2879
SCO4180	SCO5353
SCO2950	SCO2087
SCO3859	SCO2093
SCO2792	SCO1516
SCO0204	SCO4252
SCO3320	SCO4689
SCO3320	SCO5869
SCO1489	SCO5495
SCO5552	SCO3380
SCO4180	SCO3851
SCO0608	SCO5036
SCO0204	SCO4251
SCO2792	SCO5838
SCO5552	SCO3300
SCO3320	SCO2884
SCO5570	SCO3901
SCO3571	SCO4761
SCO1489	SCO1760
SCO2792	SCO2951
SCO3323	SCO5826
SCO5552	SCO5354
SCO3320	SCO2156
SCO3571	SCO4785
SCO2792	SCO7057
SCO5085	SCO7221
SCO4907	SCO1530
SCO1576	SCO3732
SCO5570	SCO5369
SCO3320	SCO2180
SCO5552	SCO1482
SCO3571	SCO1254
SCO7341	SCO5612
SCO2792	SCO5696
SCO3859	SCO6948
SCO2950	SCO5388
SCO3571	SCO3903
SCO3571	SCO2037
SCO3571	SCO2019
SCO3859	SCO4294
SCO5085	SCO5070
SCO3571	SCO3650
SCO5819	SCO5826
SCO3320	SCO3906
SCO4180	SCO3398
SCO3320	SCO2389
SCO2792	SCO1772
SCO4180	SCO5743
SCO1489	SCO2192
SCO3571	SCO3409
SCO2792	SCO2881
SCO4159	SCO5537
SCO5723	SCO3852
SCO4907	SCO5374
SCO4180	SCO3034
SCO3320	SCO5627
SCO4180	SCO3877
SCO5082	SCO5078
SCO1489	SCO5569
SCO0608	SCO1700
SCO3320	SCO2089
SCO5570	SCO4687
SCO1480	SCO2303
SCO3571	SCO3962
SCO3859	SCO2136
SCO3571	SCO2085
SCO4180	SCO2612
SCO3571	SCO6482
SCO3323	SCO4675
SCO3571	SCO6757
SCO2950	SCO1638
SCO4180	SCO2003
SCO5570	SCO5501
SCO2950	SCO4294
SCO1480	SCO5396
SCO3571	SCO4078
SCO0204	SCO6695
SCO4180	SCO4497
SCO5570	SCO1473
SCO3579	SCO7246
SCO2950	SCO3564
SCO3320	SCO6752
SCO3571	SCO1570
SCO4180	SCO1424
SCO2792	SCO5062
SCO4180	SCO1946
SCO6265	SCO0922
SCO3320	SCO5624
SCO3571	SCO5522
SCO3571	SCO3098
SCO2950	SCO0218
SCO4180	SCO1815
SCO5071	SCO2519
SCO5570	SCO3345
SCO3859	SCO3571
SCO0608	SCO7613
SCO3571	SCO3792
SCO3571	SCO4662
SCO4159	SCO5111
SCO2792	SCO6060
SCO5570	SCO2389
SCO2120	SCO1806
SCO4180	SCO1652
SCO4907	SCO2534
SCO5582	SCO0685
SCO2792	SCO5500
SCO4180	SCO1311
SCO2792	SCO3767
SCO3320	SCO4858
SCO3549	SCO6128
SCO1576	SCO5591
SCO4180	SCO2054
SCO1489	SCO5537
SCO2140	SCO5185
SCO4180	SCO6960
SCO6265	SCO5777
SCO5085	SCO4011
SCO3571	SCO4614
SCO1489	SCO2279
SCO5082	SCO5090
SCO3375	SCO3941
SCO3320	SCO7036
SCO3571	SCO3820
SCO3063	SCO4752
SCO4180	SCO4387
SCO2140	SCO1991
SCO5082	SCO5076
SCO3320	SCO1663
SCO6265	SCO5591
SCO4180	SCO1476
SCO2792	SCO4277
SCO3571	SCO4239
SCO3202	SCO6776
SCO1576	SCO5282
SCO3320	SCO4827
SCO5570	SCO5290
SCO5570	SCO1490
SCO3571	SCO5625
SCO3320	SCO2596
SCO5085	SCO5888
SCO3859	SCO3614
SCO2792	SCO4179
SCO5085	SCO5273
SCO5085	SCO4294
SCO4180	SCO5738
SCO2140	SCO5580
SCO3859	SCO4298
SCO5570	SCO1916
SCO5260	SCO2012
SCO2792	SCO5058
SCO5570	SCO5512
SCO4180	SCO2125
SCO3320	SCO4719
SCO4180	SCO2154
SCO2792	SCO5293
SCO3859	SCO4785
SCO4180	SCO3337
SCO6265	SCO0277
SCO3571	SCO6754
SCO0204	SCO4071
SCO3320	SCO5822
SCO5570	SCO0622
SCO3571	SCO4653
SCO4180	SCO3869
SCO2140	SCO5426
SCO2950	SCO1505
SCO3859	SCO3095
SCO2140	SCO2073
SCO3320	SCO2151
SCO2792	SCO2883
SCO3571	SCO5178
SCO2792	SCO1946
SCO5785	SCO5784
SCO5570	SCO5499
SCO3320	SCO5625
SCO2792	SCO1937
SCO2140	SCO2916
SCO3320	SCO2076
SCO3549	SCO2082
SCO2792	SCO1114
SCO3202	SCO1543
SCO3202	SCO4585
SCO3571	SCO3907
SCO5085	SCO5892
SCO3859	SCO4858
SCO2950	SCO0216
SCO4180	SCO5058
SCO3549	SCO5725
SCO3859	SCO4078
SCO4180	SCO2034
SCO4180	SCO1213
SCO3202	SCO1375
SCO3320	SCO5743
SCO3320	SCO4809
SCO3320	SCO1866
SCO2792	SCO3859
SCO4180	SCO4858
SCO2792	SCO5290
SCO1576	SCO2595
SCO3571	SCO7510
SCO1480	SCO4277
SCO5085	SCO4225
SCO3320	SCO4721
SCO1576	SCO5877
SCO2140	SCO2615
SCO5085	SCO3343
SCO5570	SCO3854
SCO3320	SCO2087
SCO4908	SCO3714
SCO1576	SCO3024
SCO5405	SCO0928
SCO5570	SCO1907
SCO1480	SCO5005
SCO4180	SCO5365
SCO4180	SCO2155
SCO2792	SCO2974
SCO5570	SCO3883
SCO5085	SCO4296
SCO4180	SCO2150
SCO4180	SCO1406
SCO5877	SCO0922
SCO3320	SCO5805
SCO5085	SCO0400
SCO4908	SCO3194
SCO2950	SCO3571
SCO7341	SCO0488
SCO3063	SCO5261
SCO5085	SCO5084
SCO3320	SCO4732
SCO4180	SCO4542
SCO3859	SCO3298
SCO5570	SCO0247
SCO4180	SCO5731
SCO3320	SCO3124
SCO5085	SCO0922
SCO3571	SCO3337
SCO5071	SCO6932
SCO3320	SCO2597
SCO2950	SCO6482
SCO5570	SCO3053
SCO0204	SCO5743
SCO3859	SCO1762
SCO5570	SCO5741
SCO5085	SCO1810
SCO4180	SCO4825
SCO3320	SCO3880
SCO3320	SCO5360
SCO1489	SCO5396
SCO2950	SCO0217
SCO3859	SCO2458
SCO5216	SCO6694
SCO3859	SCO5740
SCO5085	SCO5090
SCO5243	SCO5244
SCO2792	SCO2192
SCO2792	SCO0247
SCO5820	SCO5476
SCO5877	SCO4254
SCO2792	SCO6013
SCO2140	SCO5698
SCO1489	SCO5930
SCO3859	SCO2138
SCO1489	SCO1384
SCO1576	SCO6754
SCO3859	SCO2018
SCO3571	SCO1212
SCO2950	SCO6975
SCO3859	SCO5522
SCO3320	SCO4231
SCO3859	SCO2562
SCO1576	SCO1762
SCO5570	SCO5500
SCO5405	SCO1638
SCO5082	SCO5088
SCO1576	SCO1490
SCO3571	SCO6094
SCO4180	SCO2966
SCO3571	SCO4180
SCO3571	SCO4077
SCO1576	SCO4526
SCO2792	SCO2147
SCO4180	SCO3543
SCO3571	SCO0222
SCO5085	SCO1541
SCO2792	SCO1759
SCO1489	SCO1488
SCO5570	SCO5135
SCO5085	SCO6165
SCO1576	SCO0141
SCO3859	SCO4614
SCO2950	SCO5875
SCO5804	SCO1921
SCO4180	SCO4645
SCO2792	SCO3856
SCO4180	SCO2648
SCO5085	SCO3110
SCO5085	SCO0220
SCO5570	SCO5111
SCO2792	SCO5357
SCO4180	SCO5558
SCO2792	SCO2606
SCO4180	SCO4067
SCO2792	SCO3619
SCO1576	SCO0805
SCO3320	SCO3404
SCO5260	SCO5114
SCO2950	SCO4808
SCO4180	SCO5500
SCO3549	SCO3420
SCO4180	SCO3419
SCO3571	SCO5547
SCO5085	SCO1088
SCO3320	SCO3869
SCO4180	SCO2132
SCO4907	SCO3651
SCO5877	SCO0382
SCO4180	SCO1935
SCO5804	SCO1926
SCO2792	SCO5694
SCO2792	SCO4509
SCO5582	SCO2523
SCO2120	SCO2101
SCO5570	SCO3649
SCO3571	SCO4403
SCO5206	SCO4983
SCO2950	SCO4137
SCO3859	SCO3878
SCO3571	SCO1598
SCO5085	SCO0924
SCO3859	SCO2549
SCO3571	SCO3058
SCO3571	SCO3190
SCO5804	SCO4770
SCO2792	SCO1936
SCO3571	SCO1934
SCO1576	SCO2093
SCO4907	SCO5708
SCO3320	SCO0246
SCO4180	SCO2060
SCO1576	SCO3115
SCO3859	SCO1598
SCO3320	SCO2484
SCO5552	SCO3116
SCO5085	SCO5088
SCO2950	SCO4966
SCO0194	SCO0187
SCO0204	SCO0169
SCO1480	SCO6637
SCO5085	SCO5089
SCO3859	SCO5370
SCO4180	SCO2624
SCO4180	SCO1215
SCO4180	SCO2640
SCO3320	SCO1600
SCO2127	SCO5147
SCO5085	SCO5091
SCO5085	SCO4425
SCO1489	SCO5747
SCO5570	SCO2037
SCO2140	SCO2972
SCO3571	SCO6060
SCO3356	SCO4904
SCO2792	SCO5149
SCO5085	SCO5520
SCO2792	SCO6493
SCO4180	SCO5739
SCO5071	SCO1804
SCO5552	SCO3115
SCO5570	SCO2314
SCO2140	SCO4550
SCO3571	SCO7404
SCO1576	SCO5361
SCO2792	SCO2610
SCO1576	SCO5777
SCO2792	SCO2549
SCO5570	SCO6757
SCO6265	SCO4293
SCO1489	SCO4722
SCO3571	SCO1663
SCO1489	SCO5593
SCO3320	SCO3298
SCO0561	SCO4402
SCO5570	SCO2789
SCO5570	SCO6754
SCO5819	SCO5175
SCO5085	SCO5092
SCO4180	SCO5737
SCO5085	SCO0923
SCO4180	SCO7022
SCO2950	SCO1254
SCO4180	SCO5501
SCO3320	SCO3337
SCO5570	SCO4079
SCO2792	SCO2580
SCO2792	SCO3405
SCO5552	SCO0216
SCO5552	SCO6108
SCO3571	SCO4231
SCO5085	SCO6225
SCO5082	SCO5075
SCO4159	SCO4837
SCO3859	SCO2129
SCO3320	SCO3822
SCO3859	SCO2879
SCO2950	SCO0220
SCO4908	SCO3048
SCO2950	SCO3182
SCO3859	SCO5703
SCO5085	SCO0395
SCO2140	SCO4750
SCO1568	SCO4739
SCO4180	SCO5289
SCO5570	SCO2019
SCO5085	SCO5081
SCO1576	SCO1514
SCO5877	SCO0397
SCO5570	SCO2879
SCO3063	SCO7644
SCO3320	SCO1296
SCO2792	SCO2225
SCO3859	SCO3876
SCO5552	SCO5542
SCO3320	SCO3881
SCO2792	SCO0741
SCO3320	SCO4734
SCO4159	SCO2095
SCO4180	SCO1798
SCO3320	SCO5029
SCO5405	SCO2155
SCO4180	SCO1657
SCO5552	SCO2037
SCO0204	SCO2085
SCO3063	SCO5703
SCO3320	SCO5111
SCO5570	SCO0681
SCO4159	SCO3127
SCO5877	SCO0924
SCO3320	SCO2383
SCO7341	SCO5922
SCO2950	SCO0214
SCO3571	SCO1921
SCO5085	SCO5890
SCO3859	SCO2147
SCO3571	SCO3124
SCO5085	SCO4293
SCO2140	SCO2279
SCO2950	SCO5625
SCO4180	SCO2156
SCO2950	SCO4762
SCO2792	SCO3844
SCO5085	SCO0392
SCO5570	SCO2084
SCO3859	SCO0622
SCO3320	SCO1494
SCO3320	SCO6659
SCO4159	SCO4645
SCO3859	SCO4990
SCO4907	SCO5720
SCO5405	SCO3619
SCO2950	SCO3678
SCO3571	SCO4775
SCO5877	SCO0384
SCO1489	SCO4282
SCO3320	SCO4825
SCO3859	SCO1510
SCO5552	SCO2579
SCO2950	SCO3724
SCO3571	SCO1578
SCO2792	SCO3873
SCO3571	SCO1600
SCO5570	SCO2138
SCO1839	SCO7246
SCO1576	SCO3895
SCO5570	SCO2788
SCO5877	SCO6195
SCO5723	SCO6624
SCO5082	SCO5089
SCO7341	SCO4578
SCO5877	SCO5885
SCO3320	SCO5547
SCO5819	SCO5177
SCO3571	SCO3182
SCO2792	SCO4161
SCO5570	SCO6100
SCO5085	SCO5683
SCO3320	SCO1598
SCO3571	SCO2504
SCO5804	SCO3881
SCO3859	SCO6225
SCO5552	SCO6756
SCO3320	SCO3580
SCO3320	SCO2882
SCO2950	SCO0213
SCO4180	SCO3546
SCO1678	SCO4205
SCO1576	SCO6124
SCO3320	SCO2580
SCO4228	SCO1906
SCO1576	SCO5380
SCO5570	SCO1484
SCO5552	SCO6862
SCO3571	SCO5876
SCO4180	SCO2380
SCO5570	SCO6098
SCO5082	SCO5091
SCO3320	SCO5545
SCO5570	SCO3859
SCO3320	SCO6662
SCO5570	SCO3184
SCO2792	SCO2158
SCO4180	SCO2147
SCO3320	SCO2789
SCO3320	SCO6755
SCO5570	SCO5740
SCO1576	SCO4215
SCO1480	SCO2078
SCO4180	SCO4235
SCO3571	SCO4825
SCO3571	SCO2951
SCO5570	SCO1483
SCO2140	SCO2627
SCO4425	SCO0409
SCO3571	SCO2776
SCO5570	SCO4825
SCO1489	SCO4662
SCO5804	SCO1924
SCO1576	SCO6125
SCO3571	SCO4857
SCO3859	SCO7286
SCO5570	SCO5804
SCO3859	SCO4770
SCO2140	SCO6261
SCO1576	SCO1222
SCO4180	SCO5142
SCO5071	SCO2518
SCO1489	SCO3662
SCO4180	SCO2038
SCO4180	SCO3970
SCO3320	SCO4469
SCO5804	SCO1925
SCO3859	SCO6493
SCO5085	SCO4266
SCO3320	SCO2314
SCO2950	SCO1521
SCO5570	SCO3318
SCO5552	SCO6661
SCO5405	SCO1808
SCO3549	SCO2235
SCO3859	SCO3381
SCO3320	SCO1907
SCO3571	SCO3823
SCO5570	SCO4855
SCO3320	SCO2138
SCO3859	SCO2913
SCO5243	SCO2523
SCO1489	SCO5198
SCO3571	SCO6096
SCO5405	SCO4209
SCO5804	SCO3319
SCO1480	SCO5723
SCO3859	SCO2792
SCO5082	SCO5087
SCO5085	SCO3111
SCO0204	SCO1173
SCO4908	SCO1749
SCO1576	SCO1343
SCO5552	SCO1576
SCO2950	SCO4824
SCO3859	SCO5289
SCO5552	SCO5720
SCO3571	SCO5554
SCO6265	SCO4036
SCO5877	SCO0387
SCO6008	SCO2935
SCO2792	SCO7820
SCO3571	SCO2150
SCO3859	SCO1798
SCO2792	SCO3794
SCO2792	SCO5491
SCO4907	SCO2991
SCO2140	SCO2080
SCO2792	SCO3848
SCO3859	SCO3421
SCO5071	SCO0321
SCO6265	SCO6757
SCO1576	SCO3920
SCO3571	SCO3801
SCO5570	SCO5626
SCO6265	SCO1410
SCO5085	SCO5891
SCO4180	SCO2126
SCO3571	SCO4475
SCO3320	SCO4730
SCO3859	SCO2971
SCO3571	SCO1494
SCO2958	SCO0898
SCO3571	SCO3724
SCO2792	SCO5545
SCO5570	SCO2085
SCO2792	SCO5569
SCO3571	SCO2620
SCO3375	SCO0231
SCO5570	SCO2390
SCO1576	SCO1980
SCO4180	SCO4162
[truncated: 21,909 more rows]
